# Supplementary material for: Extending the biocatalytic scope of regiocomplementary flavin-dependent halogenase enzymes
Source: PubMed Central journal article supplement (PMC5659210; doi:10.1039/c5sc00913h), 2015-04-10
Supplement: SC-006-C5SC00913H-s001.pdf [file SC-006-C5SC00913H-s001.pdf]

## Supporting Information

### Extending the Biocatalytic Scope of Regiocomplementary Flavin- Dependent Halogenase Enzymes

Sarah A. Shepherd,<sup>a,b</sup> Chinnan Karthikeyan,<sup>a,b</sup> Jonathan Latham,<sup>a,b</sup> Anna-Winona Struck,<sup>a,b</sup>  
Mark L. Thompson,<sup>a,b</sup> Binuraj R.K. Menon,<sup>a,b</sup> Matthew Q. Styles,<sup>a,b</sup> Colin Levy,<sup>b,c</sup> David  
Leys<sup>b,c</sup> and Jason Micklefield<sup>a,b,\*</sup>

<sup>a</sup>*School of Chemistry*, <sup>b</sup>*Manchester Institute of Biotechnology*, and <sup>c</sup>*Faculty of Life Sciences*,  
*The University of Manchester, 131 Princess Street, Manchester M1 7DN, UK.*

#### Content

Page S1-S6 Experimental

Page S7 – S9 Supplementary References

Page S10-S20 Supplementary Figures & Tables

Page S21-S62 HPLC, NMR, UV and MS data for halogenase reaction products.

## Experimental

**General** All chemical reagents and solvents were purchased from Sigma-Aldrich Company Ltd, Fisher Scientific UK Ltd, or Alfa Aesar, a Johnson Matthey Company. All chemicals were used without further purification with the exception of anthranilic acid which was HPLC purified before use in assays.

**5-chlorotryptophan**<sup>28</sup> was prepared according to the general procedure described in the manuscript experimental section with tryptophan and PyrH to give 5-chlorotryptophan (87% yield).  $\lambda_{\max}$  (H<sub>2</sub>O/CH<sub>3</sub>CN) 226 and 286 nm; <sup>1</sup>H NMR (400 MHz, D<sub>2</sub>O)  $\delta$  7.57 (1H, d,  $J_{4,6}$  = 2.0 Hz, ArH4), 7.31 (1H, d,  $J_{7,6}$  = 8.7 Hz, ArH7), 7.17 (1H, s, ArH2), 7.07 (1H, dd,  $J_{6,7}$  = 8.7 Hz,  $J_{6,4}$  = 2.0 Hz, ArH6), 3.87 (1H, dd,  $J_{9,8A}$  = 8.0 Hz,  $J_{9,8B}$  = 4.9 Hz, H9), 3.28 (1H, dd,  $J_{8A,8B}$  = 15.7 Hz,  $J_{8A,9}$  = 4.9 Hz, H8<sub>A</sub>), 3.12 (1H, dd,  $J_{8B,8A}$  = 15.7 Hz,  $J_{8B,9}$  = 8.0 Hz, H8<sub>B</sub>); <sup>13</sup>C NMR (500/125 MHz, D<sub>2</sub>O, HMQC, HMBC)  $\delta$  137.6 (ArC7a), 130.8 (ArC3a) 129.3 (ArC2), 127.2 (ArC5), 125.1 (ArC6), 120.4 (ArC4), 116.1 (ArC7), 110.2 (ArC3), 57.9 (C9), 29.2 (C8); LRMS-ESI (m/z) 239.0 (<sup>35</sup>Cl), 241.0 (<sup>37</sup>Cl) [M+H]; HRMS-ESI (m/z): calcd for [M-NH<sub>3</sub>]<sup>+</sup> C<sub>11</sub>H<sub>9</sub>NO<sub>2</sub><sup>35</sup>Cl 222.0317 and C<sub>11</sub>H<sub>9</sub>NO<sub>2</sub><sup>37</sup>Cl 224.0287 found 222.0229 and 224.0247

**7-chlorotryptophan**<sup>31</sup> was prepared according to the general procedure described in the manuscript experimental section with tryptophan and PrnA to give 7-chlorotryptophan (84% yield).  $\lambda_{\max}$  (H<sub>2</sub>O/CH<sub>3</sub>CN) 220 and 280 nm; <sup>1</sup>H NMR (400 MHz, D<sub>2</sub>O)  $\delta$  7.51 (1H, d,  $J_{4,5}$  = 8.0 Hz, ArH4), 7.11 (1H, s, ArH2), 7.15 (1H, d,  $J_{6,5}$  = 7.6 Hz, ArH6), 7.09 (1H, t,  $J_{5,4}$  = 8.0 Hz,  $J_{5,6}$  = 7.6 Hz, ArH5), 3.89 (1H, dd,  $J_{9,8A}$  = 7.7 Hz,  $J_{9,8B}$  = 4.9 Hz, H9), 3.31 (1H, dd,  $J_{8A,8B}$  = 15.3 Hz,  $J_{8A,9}$  = 4.9 Hz, H8<sub>A</sub>), 3.15 (1H, dd,  $J_{8B,8A}$  = 15.3 Hz,  $J_{8B,9}$  = 7.7 Hz, H8<sub>B</sub>); <sup>13</sup>C NMR (400/101 MHz, MeOD, HMQC, HMBC)  $\delta$  170.4 (C10), 133.9 (ArC7a), 128.9 (ArC3a), 125.1 (ArC2), 120.9 (ArC6), 119.4 (ArC5), 116.5 (ArC4), 107.9 (ArC3), 53.0 (C9), 26.2(C8); LRMS-ESI m/z 239.1 (<sup>35</sup>Cl), 241.1 (<sup>37</sup>Cl) [M+H]; HRMS-ESI (m/z): calcd for [M+H] C<sub>11</sub>H<sub>12</sub>N<sub>2</sub>O<sub>2</sub><sup>35</sup>Cl 239.0587 and C<sub>11</sub>H<sub>12</sub>N<sub>2</sub>O<sub>2</sub><sup>37</sup>Cl 241.0558, found 239.0566 and 241.0535.

**3-chlorokynurenine**<sup>S31</sup> was prepared according to the general procedure described in the manuscript experimental section with kynurenine and PrnA to give 3-chlorokynurenine (84% yield).  $\lambda_{\max}$  (H<sub>2</sub>O/CH<sub>3</sub>CN) 228, 264 and 368 nm; <sup>1</sup>H NMR (400 MHz, MeOD)  $\delta$  7.81 (1H, dd,

$J_{6,5} = 8.2$  Hz,  $J_{6,4} = 1.3$  Hz, ArH6), 7.52 (dd,  $J_{4,5} = 7.7$  Hz,  $J_{4,6} = 1.3$  Hz, 1H, ArH4), 6.67 (1H, dd,  $J_{5,6} = 8.2$  Hz,  $J_{5,4} = 7.7$  Hz, ArH5) 4.26 (1H, dd,  $J_{9,8A} = 7.3$  Hz,  $J_{9,8B} = 3.5$  Hz, H9), 3.78 (1H, dd,  $J_{8A,8B} = 18.6$  Hz,  $J_{8A,9} = 3.5$  Hz, H8<sub>A</sub>), 3.70 (1H, dd,  $J_{8B,8A} = 18.6$  Hz,  $J_{8B,9} = 7.3$  Hz, H8<sub>B</sub>);  $^{13}\text{C}$  NMR (101 MHz, MeOD)  $\delta$  200.9 (C7), 173.5 (C10), 149.0 (ArC2), 136.8 (ArC4), 132.1 (ArC6), 122.5 (ArC3), 119.5 (ArC1), 117.1 (ArC5), 51.7 (C9), 41.3 (C8); LRMS-ESI ( $m/z$ ): 243.1 ( $^{35}\text{Cl}$ ), 245.1 ( $^{37}\text{Cl}$ ) [M+H]; HRMS-ESI ( $m/z$ ): calcd for [M+H]  $\text{C}_{10}\text{H}_{12}\text{N}_2\text{O}_3$   $^{35}\text{Cl}$  243.0536 and  $\text{C}_{10}\text{H}_{12}\text{N}_2\text{O}_3$   $^{37}\text{Cl}$  245.0507, found 243.0515 and 245.0484.

**5-chlorokynurenine**<sup>S31</sup> was prepared according to the general procedure described in the manuscript experimental section with kynurenine and PyrH to give 5-chlorokynurenine (76% yield).  $\lambda_{\text{max}}$  (H<sub>2</sub>O/CH<sub>3</sub>CN) 230, 258 and 378 nm;  $^1\text{H}$  NMR (500 MHz, D<sub>2</sub>O)  $\delta$  7.85 (1H, d,  $J_{6,4} = 2.8$  Hz, ArH6), 7.38 (1H, dd,  $J_{4,3} = 9.4$  Hz,  $J_{4,6} = 2.8$  Hz, ArH4), 6.87 (1H, d,  $J_{3,4} = 9.4$  Hz, ArH3), 4.16 (1H, dd,  $J_{9,8A} = 7.4$  Hz,  $J_{9,8B} = 5.0$  Hz, H9), 3.68 (2H, m, H8<sub>A</sub>+ H8<sub>B</sub>);  $^{13}\text{C}$  NMR (500MHz/125 MHz, D<sub>2</sub>O, HSQC)  $\delta$  138.2 (ArC4), 133.6 (ArC6), 122.4 (ArC3), 53.4 (C9), 42.0 (C8); LRMS-ESI  $m/z$  243.0, 245.0 [M+H] HRMS-ESI ( $m/z$ ): calcd for [M+H]  $\text{C}_{10}\text{H}_{12}\text{N}_2\text{O}_3$   $^{35}\text{Cl}$  243.0536 and  $\text{C}_{10}\text{H}_{12}\text{N}_2\text{O}_3$   $^{37}\text{Cl}$  245.0507, found 243.0513 and 245.0482.

**3-chloroanthranilamide**<sup>S32</sup> was prepared according to the general procedure described in the manuscript experimental section with anthranilamide and PrnA to give 3-chloroanthranilamide (14% yield).  $\lambda_{\text{max}}$  (H<sub>2</sub>O/CH<sub>3</sub>CN) 220, 242 and 330 nm;  $^1\text{H}$  NMR (400 MHz, MeOD)  $\delta$  7.52 (1H, dd,  $J_{6,5} = 7.5$  Hz,  $J_{6,4} = 1.4$  Hz, ArH6), 7.38 (1H, dd,  $J_{4,5} = 7.9$  Hz,  $J_{4,6} = 1.4$  Hz, ArH4), 6.62 (1H, dd,  $J_{5,6} = 7.5$  Hz,  $J_{5,4} = 7.9$  Hz, ArH5); LRMS-ESI ( $m/z$ ) 171.0, 173.1 [M+H]; HRMS-ESI ( $m/z$ ): calcd for [M+H]  $\text{C}_7\text{H}_8\text{N}_2\text{O}$   $^{35}\text{Cl}$  171.0325 and  $\text{C}_7\text{H}_8\text{N}_2\text{O}$   $^{37}\text{Cl}$  173.0296, found 171.0308 and 173.0277

**5-chloroanthranilamide**<sup>S33</sup> was prepared according to the general procedure described in the manuscript experimental section with anthranilamide and PyrH to give 5-chloroanthranilamide (19% yield).  $\lambda_{\text{max}}$  (H<sub>2</sub>O/CH<sub>3</sub>CN) 216, 254 and 340 nm;  $^1\text{H}$  NMR (400 MHz, MeOD)  $\delta$  7.55 (1H, d,  $J_{6,4} = 2.3$  Hz, ArH6), 7.17 (1H, dd,  $J_{4,3} = 8.7$  Hz,  $J_{4,6} = 2.3$  Hz, ArH4), 6.74 (1H, d,  $J_{3,4} = 8.7$  Hz, ArH3).  $^{13}\text{C}$  NMR (400MHz/101 MHz, MeOD, HSQC)  $\delta$  132.0 (ArC4), 127.8 (ArC6), 117.9 (ArC3); LRMS-ESI ( $m/z$ ) 171.0, 173.0 [M+H]; HRMS-ESI ( $m/z$ ): calcd for [M+H]  $\text{C}_7\text{H}_8\text{N}_2\text{O}$   $^{35}\text{Cl}$  171.0325 and  $\text{C}_7\text{H}_8\text{N}_2\text{O}$   $^{37}\text{Cl}$  173.0296, found 171.0307 and 173.0277.

**3-chloroanthranilic acid**<sup>S34</sup> was prepared according to the general procedure described in the manuscript experimental section with anthranilic acid and PrnA E450K to give 3-chloroanthranilic acid (12% yield).  $\lambda_{\max}$  (H<sub>2</sub>O/CH<sub>3</sub>CN) 220, 244 and 338 nm; <sup>1</sup>H NMR (400 MHz, MeOD)  $\delta$  7.84 (1H, dd,  $J_{6,5}$  = 8.1 Hz,  $J_{6,4}$  = 1.5 Hz, ArH6), 7.42 (1H, dd,  $J_{4,5}$  = 7.9 Hz,  $J_{4,6}$  = 1.5 Hz, ArH4), 6.62 (1H, dd,  $J_{5,6}$  = 8.1 Hz,  $J_{5,4}$  = 7.9 Hz, ArH5); <sup>13</sup>C NMR (400MHz/101 MHz, MeOD, HSQC, HMBC)  $\delta$  169.8 (C7), 147.0 (ArC1), 133.3 (ArC4), 130.1 (ArC6), 119.3 (ArC3), 114.9 (ArC5), 111.5 (ArC2); LRMS-ESI m/z 172.0, 173.9 [M+H]; HRMS-ESI (m/z): calcd for [M+H] C<sub>7</sub>H<sub>7</sub>NO<sub>2</sub><sup>35</sup>Cl 172.0165 and C<sub>7</sub>H<sub>7</sub>NO<sub>2</sub><sup>37</sup>Cl 174.0136, found 172.0148 and 174.0116.

**5-chloroanthranilic acid**<sup>S33</sup> was prepared according to the general procedure described in the manuscript experimental section with anthranilic acid and PyrH to give 5-chloroanthranilic acid (9.4% yield)  $\lambda_{\max}$  (H<sub>2</sub>O/CH<sub>3</sub>CN) 220, 256 and 340 nm; <sup>1</sup>H NMR (400 MHz, MeOD)  $\delta$  7.75 (1H, d,  $J_{6,4}$  = 2.6 Hz, ArH6), 7.20 (1H, dd,  $J_{4,6}$  = 2.6 Hz,  $J_{4,3}$  = 8.9 Hz, ArH4), 6.74 (1H, d,  $J_{3,4}$  = 8.9 Hz, ArH3); LRMS-ESI m/z 172.0, 173.9 [M+H]; HRMS-ESI (m/z): calcd for [M+H] C<sub>7</sub>H<sub>7</sub>NO<sub>2</sub><sup>35</sup>Cl 172.0165 and C<sub>7</sub>H<sub>7</sub>NO<sub>2</sub><sup>37</sup>Cl 174.0136, found 172.0149 and 174.0117.

Chlorination of 2-amino-4-methylbenzamide was carried out according to the procedure described in the manuscript experimental section with starting material 2-amino-4-methylbenzamide and enzyme PrnA to give a mixture of 3 and 5-chlorinated products. The products were separated by HPLC to give product 2-amino-3-chloro-4-methylbenzamide (6.5% yield) and 2-amino-5-chloro-4-methylbenzamide (9.8% yield). **2-amino-3-chloro-4-methylbenzamide** -  $\lambda_{\max}$  (H<sub>2</sub>O/CH<sub>3</sub>CN) 220, 250 and 328 nm; <sup>1</sup>H NMR (400 MHz, MeOD)  $\delta$  7.43 (1H, d,  $J_{6,5}$  = 8.0 Hz, ArH6), 6.59 (1H, d,  $J_{5,6}$  = 8.0 Hz, ArH5), 2.36 (3H, s, CH<sub>3</sub>); LRMS-ESI m/z 185.0, 187.0 [M+H]; HRMS-ESI (m/z): calcd for [M+H] C<sub>8</sub>H<sub>10</sub>N<sub>2</sub>O<sup>35</sup>Cl 185.0482 and C<sub>8</sub>H<sub>10</sub>N<sub>2</sub>O<sup>37</sup>Cl 187.0452, found 185.0464 and 187.0433. **2-amino-5-chloro-4-methylbenzamide** -  $\lambda_{\max}$  (H<sub>2</sub>O/CH<sub>3</sub>CN) 218, 256 and 338 nm; <sup>1</sup>H NMR (500 MHz, MeOD)  $\delta$  7.57 (1H, s, ArH6), 6.84 (1H, s, ArH3), 2.31 (3H, s, CH<sub>3</sub>); <sup>13</sup>C NMR (125 MHz/500 MHz, MeOD, HSQC, HMBC)  $\delta$  144.5 (C2), 131.5 (C6), 122.8 (C3), 122.4 (C5), 22.2 (CH<sub>3</sub>); LRMS-ESI m/z 185.0, 187.0 [M+H<sup>+</sup>]; HRMS-ESI (m/z): calcd for [M+H] C<sub>8</sub>H<sub>10</sub>N<sub>2</sub>O<sup>35</sup>Cl 185.0482 and C<sub>8</sub>H<sub>10</sub>N<sub>2</sub>O<sup>37</sup>Cl 187.0452, found 185.0462 and 187.0432.

Chlorination of 2-amino-*N*-ethylbenzamide was carried out according to the procedure described in the manuscript experimental section with starting material 2-amino-*N*-ethylbenzamide and enzyme PrnA to give a mixture of 3 and 5-chlorinated products. The products were separated by HPLC to give 2-amino-3-chloro-*N*-ethylbenzamide and 2-amino-5-chloro-*N*-ethylbenzamide. Yields not recorded. **2-amino-3-chloro-*N*-ethylbenzamide** -  $\lambda_{\max}$  (H<sub>2</sub>O/CH<sub>3</sub>CN) 216 and 324 nm; <sup>1</sup>H NMR (400 MHz, MeOD)  $\delta$  7.53 (1H, dd,  $J_{6,5}$  = 7.8 Hz,  $J_{6,4}$  = 1.4 Hz, ArH6), 7.46 (1H, dd,  $J_{4,5}$  = 7.9 Hz,  $J_{4,6}$  = 1.4 Hz, ArH4), 6.59 (1H, dd,  $J_{5,4}$  = 7.9 Hz,  $J_{5,6}$  = 7.8 Hz, ArH5), 3.39 (2H, q,  $J_{9,10}$  = 7.2 Hz, C9H<sub>2</sub>), 1.24 (3H, t,  $J_{10,9}$  = 7.2 Hz, C10H<sub>3</sub>); LRMS-ESI *m/z* 199.0, 201.0 [M+H<sup>+</sup>]. **2-amino-5-chloro-*N*-ethylbenzamide** -  $\lambda_{\max}$  (H<sub>2</sub>O/CH<sub>3</sub>CN) 218, 254 and 336 nm; <sup>1</sup>H NMR (400 MHz, MeOD)  $\delta$  7.50 (1H d,  $J_{6,4}$  = 2.5 Hz, ArH6), 7.21 (1H, dd,  $J_{4,3}$  = 8.7 Hz,  $J_{4,6}$  = 2.5 Hz, ArH4), 6.82 (1H, d,  $J_{3,4}$  = 8.7 Hz, ArH3), 3.37 (2H, q,  $J_{9,10}$  = 7.3 Hz, CH<sub>2</sub>), 1.22 (3H, t,  $J_{10,9}$  = 7.3 Hz, C10H<sub>3</sub>); <sup>13</sup>C NMR (400 MHz/101 MHz, MeOD, HMQC)  $\delta$  131.1 (C4), 127.1 (C6), 118.8 (C3), 34.0 (C9) 13.4 (C10); LRMS-ESI *m/z* 199.0, 201.0 [M+H<sup>+</sup>]; HRMS-ESI (*m/z*): calcd for [M+H] C<sub>9</sub>H<sub>12</sub>N<sub>2</sub>O<sup>-35</sup>Cl 199.0638 and C<sub>9</sub>H<sub>12</sub>N<sub>2</sub>O<sup>-37</sup>Cl 201.0609, found 199.0620 and 201.0588.

***N*-(4-chlorophenyl)anthranilic acid**<sup>S35</sup> was prepared according to the general procedure described in the manuscript experimental section with *N*-phenylanthranilic acid and PrnA to give *N*-(4-chlorophenyl)anthranilic acid (7% yield)  $\lambda_{\max}$  (H<sub>2</sub>O/CH<sub>3</sub>CN) 222, 284 and 354 nm; <sup>1</sup>H NMR (800 MHz, MeOD)  $\delta$  7.96 (1H, d,  $J_{7,8}$  = 7.5 Hz, ArH7), 7.25 (2H, d,  $J_{3,2}$  = 8.8 Hz, ArH3), 7.18 (2H, d,  $J_{2,3}$  = 8.8 Hz, ArH2), 7.28-7.23 (2H, m, ArH9+10), 6.76 (1H, t,  $J_{8,7}$  = 7.5 Hz, ArH8 ); <sup>13</sup>C NMR (800 MHz/201 MHz, MeOD, HSQC, HSQC TOCSY)  $\delta$  131.8 (C7), 130.9 (C9), 128.8 (C3), 120.5 (C2), 117.4 (C8), 113.7 (C10); LRMS-ESI *m/z* 248.0, 250.0 [M+H]; HRMS-ESI (*m/z*): calcd for [M-H] C<sub>13</sub>H<sub>9</sub>NO<sub>2</sub><sup>-35</sup>Cl 246.0327 and C<sub>13</sub>H<sub>9</sub>NO<sub>2</sub><sup>-37</sup>Cl 248.0297, found 246.0363 and 248.0457

**Enzyme Preparation, Crystallization, and Soaking.** For crystallographic trials, E450K and F454K variant enzymes for PrnA halogenase from *Pseudomonas fluorescens* were prepared by overexpressing in Origami™ 2(DE3) Singles™ competent cells from Novagen. Bacterial cells containing the pet28b\_PrnA plasmid (Hexa His tagged at C and N terminal) were grown in 2YT medium at 37°C for 2 h, before decreasing the temperature to 24°C until OD<sub>600</sub> 0.6. Recombinant protein overexpression was induced with IPTG (0.1 mM) and the cells

incubated at 18°C for a further 24 h prior to harvesting by centrifugation (4°C, 20 min, 4000 x g.). Proteins were purified initially using an Ni<sup>2+</sup> sepharose affinity tag procedure (as described previously), followed by loading onto a 140 ml Sephadex 200 size exclusion chromatography column (pre-equilibrated with 50 mM potassium phosphate, 500 mM NaCl, pH 7.2). Monomeric homogeneous variant enzyme solution was subsequently diluted (12.5 mg/ml) in crystallization buffer (20 mM HEPES, 100 mM NaCl, pH 7.2 buffer) and mixed in a 1:1 ratio with the precipitant solution (commercially available protein crystallization screen solution Morpheus®, single reagent, tube Number c3 from Molecular Dimensions). The composition of the precipitant solution was as follows: 1.0 M Imidazole and MES Buffer Mix at pH 6.5, containing 0.09 M nitrate phosphate sulfate salt mix (NaNO<sub>3</sub>; Na<sub>2</sub>HPO<sub>4</sub>; (NH<sub>4</sub>)<sub>2</sub>SO<sub>4</sub>) and 60% w/v glycerol and polyethylene glycol 4K). Crystals were grown by vapour diffusion at 4°C overnight.

**Data Collection, Model Building, and Refinement.** Data were collected at Diamond Light Source from single cryofrozen crystals of PrnA variant F454K and E450K crystals to a resolution of 2.4Å and 2.3Å respectively. (Table S3).

All data were processed and scaled using XDS and the structures solved by molecular replacement in Phaser (Search model 2AQJ). Iterative cycles of rebuilding and refinement were carried out in COOT and Phenix, validation with MOLPROBITY was integrated into the iterative rebuild process. Further validation of the final model was carried out using PDB\_REDO. The crystal structures for F454K and E450K are deposited in the protein data bank (pdb files 4Z44 and 4Z43).

## Supplementary References

- S1 S. S. Antonysamy, B. Aubol, J. Blaney, M. F. Browner, A. M. Giannetti, S. F. Harris, N. Hébert, J. Hendle, S. Hopkins, E. Jefferson, et al., *Bioorg. Med. Chem. Lett.* 2008, **18**, 2990–5.
- S2 D. Joseph-McCarthy, K. Parris, A. Huang, A. Failli, D. Quagliato, E. G. Dushin, E. Novikova, E. Severina, M. Tuckman, P. J. Petersen, et al., *J. Med. Chem.* 2005, **48**, 7960–9.
- S3 N. Koay, L. Campeau, *J. Heterocycl. Chem.* 2011, **48**, 473–478.
- S4 B. G. Shearer, H. S. Patel, A. N. Billin, J. M. Way, D. a Winegar, M. H. Lambert, R. X. Xu, L. M. Leesnitzer, R. V Merrihew, S. Huet, et al., *Bioorg. Med. Chem. Lett.* 2008, **18**, 5018–22.
- S5 P. Filippakopoulos, S. Picaud, O. Fedorov, M. Keller, M. Wrobel, O. Morgenstern, F. Bracher, S. Knapp, *Bioorg. Med. Chem.* 2012, **20**, 1878–86.
- S6 K. Ozaki, Y. Yamada, T. Oine, *J. Med. Chem.* 1985, **28**, 568–576.
- S7 M. Pippel, B. D. Allison, V. K. Phuong, L. Li, M. F. Morton, C. Prendergast, X. Wu, N. P. Shankley, M. H. Rabinowitz, *Bioorg. Med. Chem. Lett.* 2009, **19**, 6373–5.
- S8 M. Pippel, K. Boyce, H. Venkatesan, V. K. Phuong, W. Yan, T. D. Barrett, G. Lagaud, L. Li, M. F. Morton, C. Prendergast, et al., *Bioorg. Med. Chem. Lett.* 2009, **19**, 6376–8.
- S9 U. Schindler, H. Strobel, K. Schönafinger, *Mol. Pharmacol.* 2006, **69**, 1260–1268.
- S10 A. M. Doody, A. L. Antosh, W. J. Brown, *Biochem. Biophys. Res. Commun.* 2009, **388**, 695–9.
- S11 A. Pajor, N. Sun, *Biochemistry* 2013, **52**, 2924–2932.
- S12 G. P. Lahm, T. M. Stevenson, T. P. Selby, J. H. Freudenberger, D. Cordova, L. Flexner, C. a Bellin, C. M. Dubas, B. K. Smith, K. a Hughes, et al., *Bioorg. Med. Chem. Lett.* 2007, **17**, 6274–9.
- S13 G. P. Lahm, T. P. Selby, J. H. Freudenberger, T. M. Stevenson, B. J. Myers, G. Seburyamo, B. K. Smith, L. Flexner, C. E. Clark, D. Cordova, *Bioorg. Med. Chem. Lett.* 2005, **15**, 4898–906.
- S14 G. M. Karp, *J. Org. Chem.* 1995, **60**, 5814–5819.
- S15 C. Gnamm, A. Jeanguenat, A. C. Dutton, C. Grimm, D. P. Kloer, A. J. Crossthwaite, *Bioorg. Med. Chem. Lett.* 2012, **22**, 3800–6.
- S16 K. Kimura, T. Kitagawa, O. Uchida, *Method of Producing Benzoxazinone-Based Compound*, 2009, Patent WO 2009/041715 A1.

- S17 N. Griebenow, A. Buchmüller, P. Kolkhof, H. Bischoff, *Substituted Benzoxepino-Isoxazoles and Use Thereof*, 2007, WO 2008/003424 A1.
- S18 B. Aquila, L. Dakin, J. Ezhuthachan, J. Lee, P. Lyne, T. Pontz, *Substituted Quinazolones as Anti-Cancer Agents*, 2008, US 2008/0275022 A1.
- S19 A. Krasinski, S. Punna, S. Ungashe, Q. Wang, Y. Zeng, *Fused Heteroaryl Pyridyl and Phenyl Benzenesulfonamides as CCR2 Modulators for the Treatment of Inflammation*, 2011, US 2011/0319433 A1.
- S20 N. Ip, F. Ip, Y. Hu, Y. Han, S. Chung, *Heterodimers And Methods Of Using Them*, 2009, US 7,605,265 B2.
- S21 A. Nardi, M. Grunnet, J. Demnitz, T. D. Jensen, P. Christophersen, D. S. Jones, *Novel Cinnamic Amide Derivatives Useful as Ion Channel Modulators*, 2007, WO 2008/074755 A2.
- S22 P. Chen, A. Daugan, R. L. M. Gosmini, D. Igo, L. Katrincic, P. Martres, E. Nicodeme, *Compounds Which Increase Apolipoprotein A-1 Production and Uses Thereof in Medicine*, 2006, WO 2006032470 A1.
- S23 M. Hadd, M. Holladay, M. Rowbottom, *Quinazoline Compounds and Methods of Use Thereof*, 2012, WO 2012/030948 A1.
- S24 T. W. Butler, A. F. J. Fliri, R. J. Gallaschun, B. P. Jones, J. A. Ragan, *Tetrahydroquinazoline-2, 4-Diones and Therapeutic Uses Thereof*, 2001, EP 1 083 178 A1.
- S25 P. D. Adams, P. V. Afonine, G. Bunkoczi, V. B. Chen, I. W. Davis, N. Echols, J. J. Headd, L. W. Hung, G. J. Kapral, R. W. Grosse-Kunstleve, A. J. McCoy, N. W. Moriarty, R. Oeffner, R. J. Read, D. C. Richardson, J. S. Richardson, T. C. Terwilliger, P. H. Zwart, *Acta Crystallographica Section D-Biological Crystallography* 2010, **66**, 213-221.
- S26 V. B. Chen, W. B. Arendall, J. J. Headd, D. A. Keedy, R. M. Immormino, G. J. Kapral, L. W. Murray, J. S. Richardson, D. C. Richardson, *Acta Crystallographica Section D-Biological Crystallography*, 2010, **66**, 12-21.
- S27 P. Emsley, K. Cowtan, *Acta Crystallographica Section D-Biological Crystallography*, 2004, **60**, 2126-2132.
- S28 R. P. Joosten, F. Long, G. N. Murshudov, A. Perrakis, *IUCrJ*, 2014, **1**, 213-220.
- S29 W. Kabsch, *Acta Crystallographica Section D-Biological Crystallography* 2010, **66**, 125-132.
- S30 A. J. McCoy, R. W. Grosse-Kunstleve, P. D. Adams, M. D. Winn, L. C. Storoni, R. J. Read, *J Appl Crystallogr*, 2007, **40**, 658-674.



- S31 C. Maitrani, R. S. Phillips, *Bioorg. Med. Chem.* 2013, **21**, 4670–7.
- S32 A. Nathubhai, R. Patterson, T. J. Woodman, H. E. C. Sharp, M. T. Y. Chui, H. H. K. Chung, S. W. S. Lau, J. Zheng, M. D. Lloyd, A. S. Thompson, et al., *Org. Biomol. Chem.* 2011, **9**, 6089–99.
- S33 H. Zhao, H. Fu, R. Qiao, *J. Org. Chem.* 2010, **75**, 3311–6.
- S34 S. Tani, N. Yadomatsu, A. Ikumi, Y. Hirano, T. Ido, *Nitrobenzene Compound Manufacturing Method*, 2014, EP 2 754 651 A1.
- S35 A. O. Adeniji, B. M. Twenter, M. C. Byrns, Y. Jin, M. Chen, J. D. Winkler, T. M. Penning, *J. Med. Chem.* 2012, **55**, 2311–2323.

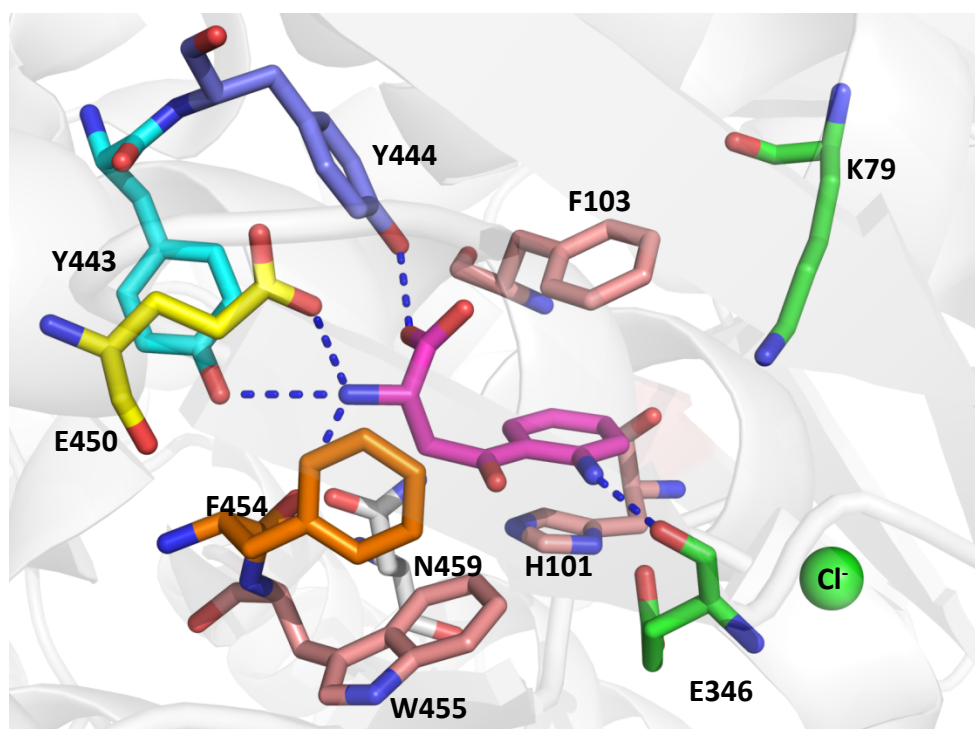

**Figure S1** – Kynurenine (magenta) docked into PnA crystal structure (2AQJ) showing possible active site interactions. Key active site residues K79 (green), H101 (pink), F103 (pink), E346 (green), Y443 (cyan), Y444 (blue), E450 (yellow), F454 (orange), W455 (pink) and N459 (grey).

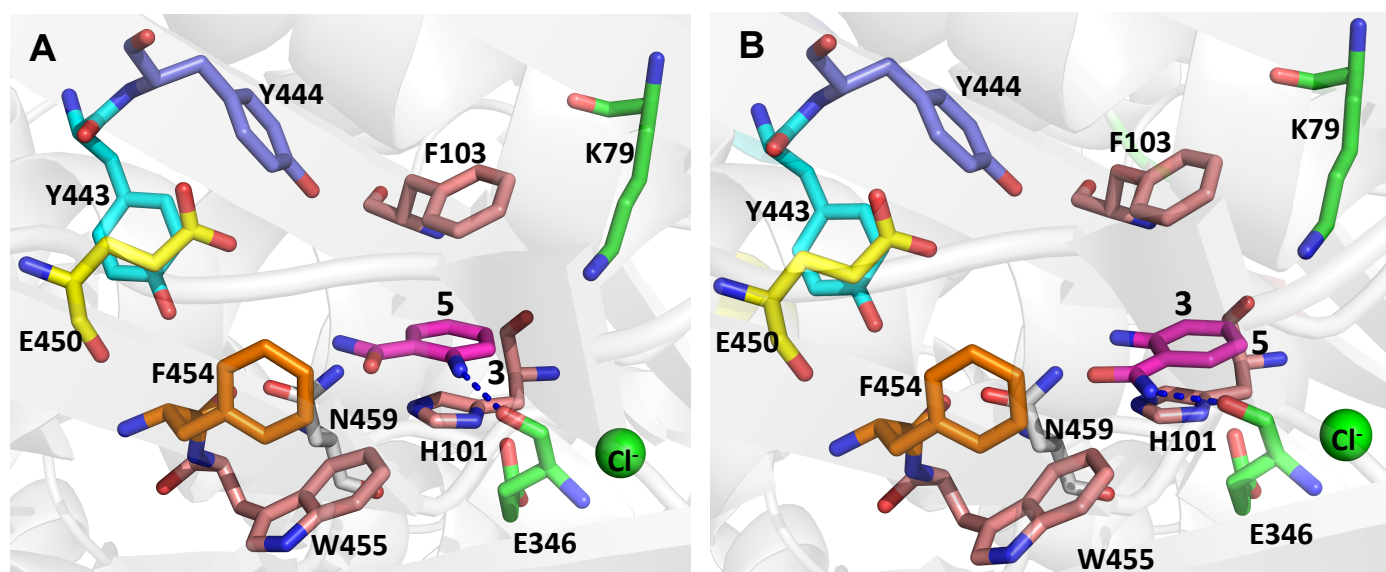

**Figure S2** - Anthranilamide (magenta) docked into PnA crystal structure (2AQJ) showing possible active site interactions. **(A)** Orientation of substrate favouring halogenation at the 3-position of anthranilamide, **(B)** Orientation of substrate favouring halogenation at the 5-position of anthranilamide. Key active site residues K79 (green), H101 (pink), F103 (pink), E346 (green), Y443 (cyan), Y444 (blue), E450 (yellow), F454 (orange), W455 (pink), N459 (grey).

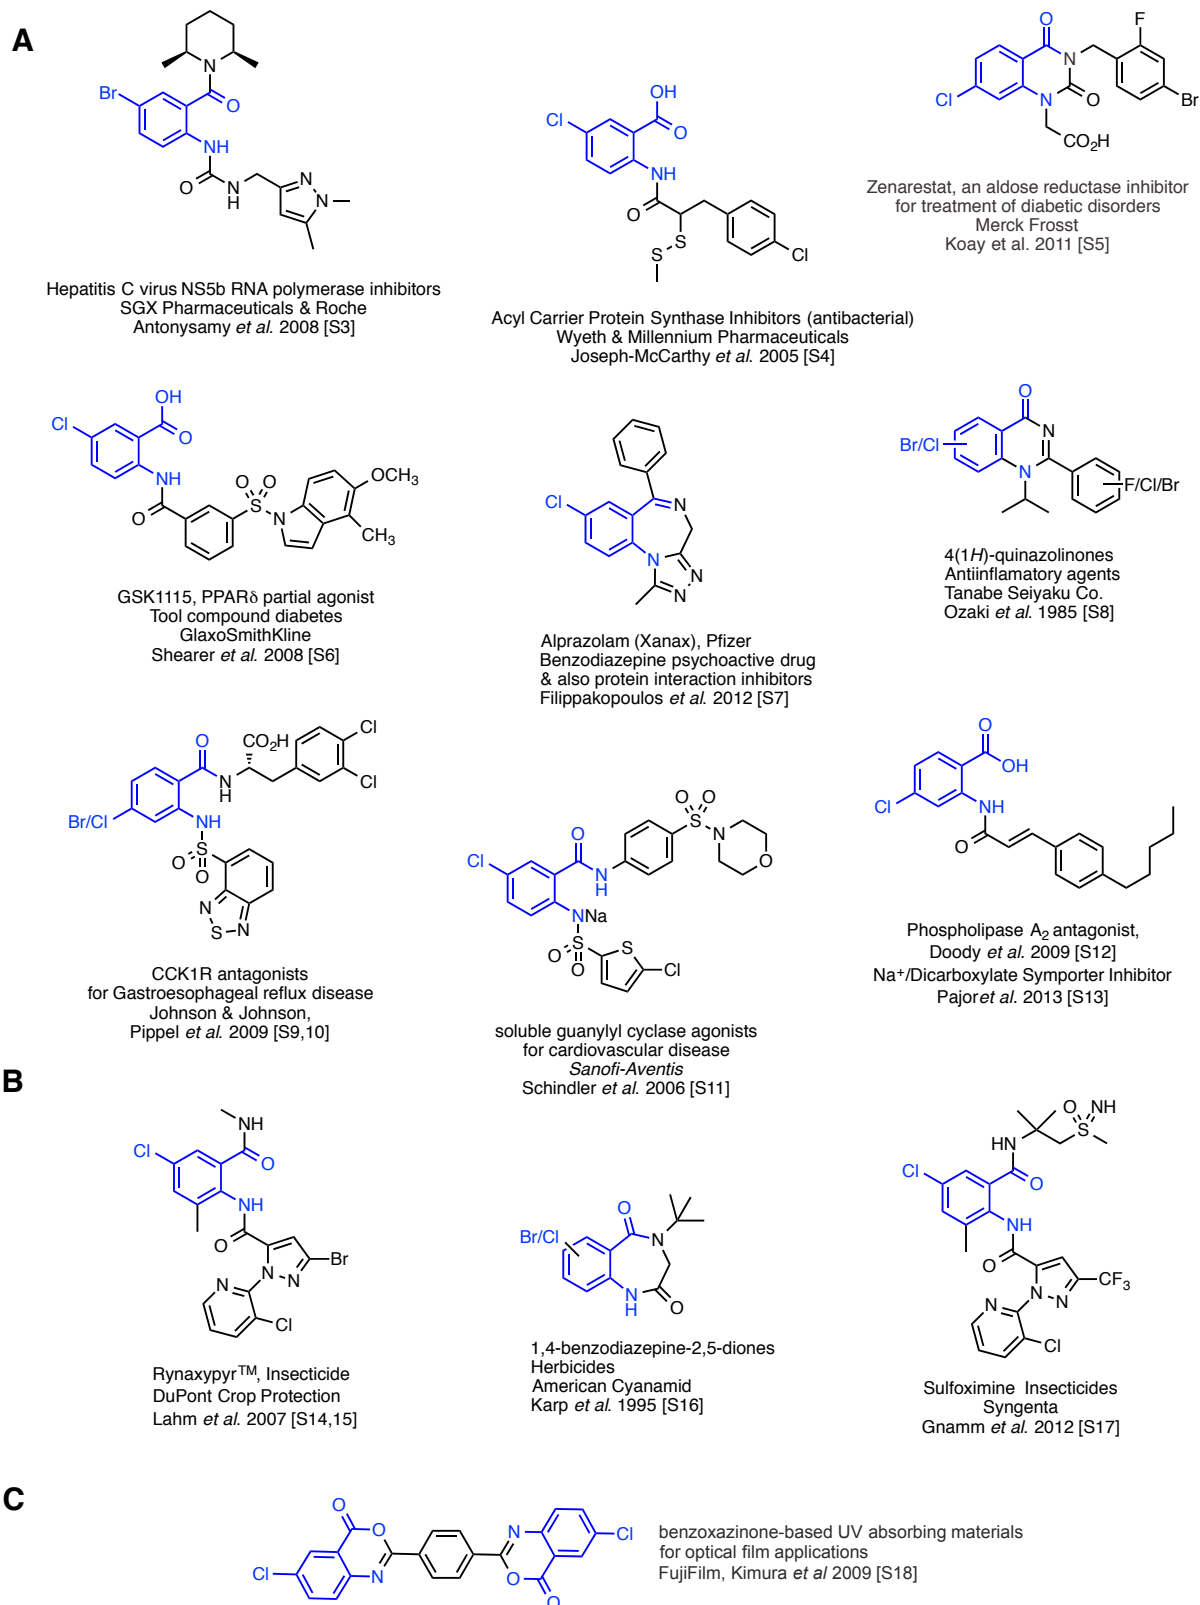

**Figure S3.** Halogenated anthranilic acids derivatives have been reported widely in the scientific and patent literature and are of considerable industrial importance. The diversity of important biological targets [S1-S15] illustrated above would suggest that halo anthranilic acid represent a privileged bioactive structure: **(A)** Some examples of pharmaceuticals in use and in development that are halo anthranilic acid derivatives [S1-S11]; **(B)** Agrochemicals derived from from halo anthranilic acids [S12-S15] including DuPont's "blockbuster" insecticide Rynaxypyr (chlorantraniliprole); **(C)** Chloro anthranilic acid based materials (FujiFilm) [S16]; Other examples where halo anthranilic acid derivatives have been used industry are also cited [S17-S24].

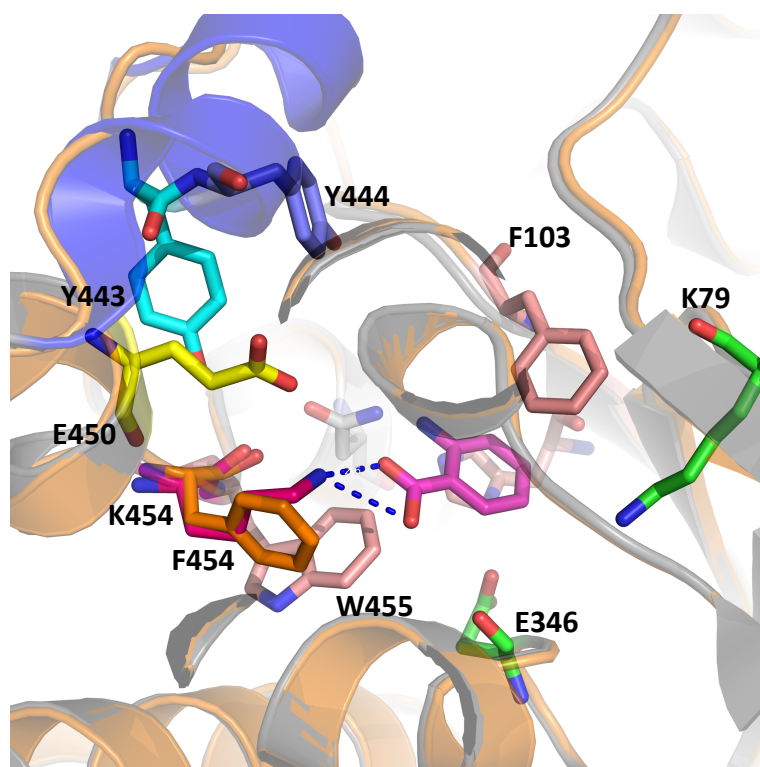

**Figure S4.** X-ray crystal structures of PrnA wild-type (PDB 2AQJ) in grey cartoon aligned with PrnA F454K (PDB 4Z44) in orange cartoon, with anthranilic acid **4** docked in an alternative binding mode (shown in magenta). The region in blue is a helical region in the wild type compared to a loop in the F454K structure. Only key active site residues are displayed, with mutant residue K454 shown as red sticks. The additional contact between the carboxylate group of **4** and K454, may enable an alternative substrate binding mode opposite to the one shown in Figure 4; in this case the amino group of **4** is oriented away from E346 at the opposite side of the substrate binding pocket, which would favour C5-halogenation. This would account for the increase in C5-halogenation of F454K, compared with the wild-type enzyme. In the wild-type enzyme an H-bond between the amino group of **4** and E346 is likely to be the major contact with the substrate which would lead to predominately C3 halogenation.

| PrnA Mutant | % 4a | % 4b | % Conversion (4a, 4b) |
|-------------|------|------|-----------------------|
| Wild type   | 16   | 84   | 1.7                   |
| E450K       | 7    | 93   | 14.2                  |
| E450R       | 18   | 82   | 4.9                   |
| F454K       | 38   | 62   | 7.5                   |
| F454R       | 46   | 54   | 3.0                   |
| E450K F454K | 54   | 46   | 27.6                  |
| E450K F454R | 62   | 38   | 16.7                  |
| E450R F454K | 44   | 56   | 16.2                  |

**Table S1** - Results from PrnA mutants with Anthranilic acid, showing % conversion of 5-chloroanthranilic acid (4a) and 3-chloroanthranilic (4b) as well as total % conversion

|                         |                                                       |
|-------------------------|-------------------------------------------------------|
| <i>prnA</i> F           | 5'-AAAAAACATATGATGAACAAGCCAATCAAGAA-3'                |
| <i>prnA</i> R           | 3'-AAAAAAGCGGCCCGCCTACTGGCGTTCCTGAGCC-5'.             |
| <i>fre</i> F            | 5'-AAAAAAGGTACCATGACAACCTTAAGCTGTAAA-3'               |
| <i>fre</i> R            | 3'-AAAAA <u>ACTCGAGT</u> CAGATAAATGCAAACGCATC-5'      |
| <i>prnA</i> E450K F     | 5'-CCACGTATCACGAGACCTTCGACTACAAATTCAAG-3'             |
| <i>prnA</i> E450K R     | 5'-GCCGTTCAACCAGAAGTTCTTGAATTTGTAGTC-3'               |
| <i>prnA</i> F454K       | 5'-CGACTACGAATTC AAGAATAAATGGTTGAACGGCAACTACT-3'      |
| <i>prnA</i> F454R       | 5'-CGACTACGAATTC AAGAATCGCTGGTTGAACGGCAACTACT-3'      |
| <i>prnA</i> Y444K       | 5'-CGTTCGACGATTCCACGTACAAGAGACCTTCGACTACGAATT-3'      |
| <i>prnA</i> Y444R       | 5'-CGTTCGACGATTCCACGTACCGCGAGACCTTCGACTACGAATT-3'     |
| <i>prnA</i> Y443K       | 5'-GTCGTTTCGACGATTCCACGAAATACGAGACCTTCGACTACG-3'      |
| <i>prnA</i> Y443R       | 5'-GTCGTTTCGACGATTCCACGCGCTACGAGACCTTCGACTACG-3'      |
| <i>prnA</i> E450K F454K | 5'-CTACGAGACCTTCGACTACAAATTCAAGAATAAATGGTTG-3'        |
| <i>prnA</i> E450K F454R | 5'-CTACGAGACCTTCGACTACAAATTCAAGAATCGCTGGTTG-3'        |
| <i>prnA</i> E450R F454K | 5'-GTACTACGAGACCTTCGACTACCGTTTCAAGAATAAATGGTTGAACG-3' |

**Table S2** – Primers used in this study

| Data collection           | F454K (4Z44)<br>FAD and Cl | E450K (4Z43)<br>FAD and Cl  |
|---------------------------|----------------------------|-----------------------------|
| Wavelength (Å)            | 0.977                      | 0.977                       |
| Resolution range (Å)      | 68.84-2.20 (2.28-2.20)     | 30.85-2.29 (2.37-2.29)      |
| Space group               | P 43 21 2                  | P 43 21 2                   |
| Unit cell                 | 68.1 68.1 275.38 90 90 90  | 68.74 68.74 276.17 90 90 90 |
| Unique reflections        | 33920 (3298)               | 30949 (3030)                |
| Completeness (%)          | 99.96 (99.82)              | 99.92 (99.93)               |
| Mean I/sigma(I)           | 8.31 (3.80)                | 22.16 (3.44)                |
| Wilson B-factor           | 31.37                      | 47.95                       |
| R-work                    | 0.1795                     | 0.2075                      |
| R-free                    | 0.2325                     | 0.2578                      |
| Number of atoms           | 4561                       | 4220                        |
| macromolecules            | 4158                       | 4067                        |
| ligands                   | 59                         | 53                          |
| water                     | 344                        | 100                         |
| RMS(bonds)                | 0.008                      | 0.009                       |
| RMS(angles)               | 1.13                       | 1.21                        |
| Ramachandran favored (%)  | 97                         | 94.2                        |
| Ramachandran outliers (%) | 0.19                       | 0.40                        |
| Clashscore                | 2.41                       | 7.71                        |
| Average B-factor          | 26.00                      | 51.2                        |
| macromolecules            | 25.70                      | 51.3                        |
| ligands                   | 24.60                      | 46.5                        |
| solvent                   | 30.10                      | 48.9                        |

**Table S3** - Crystallographic data and refinement statistics <sup>[S25-29]</sup>

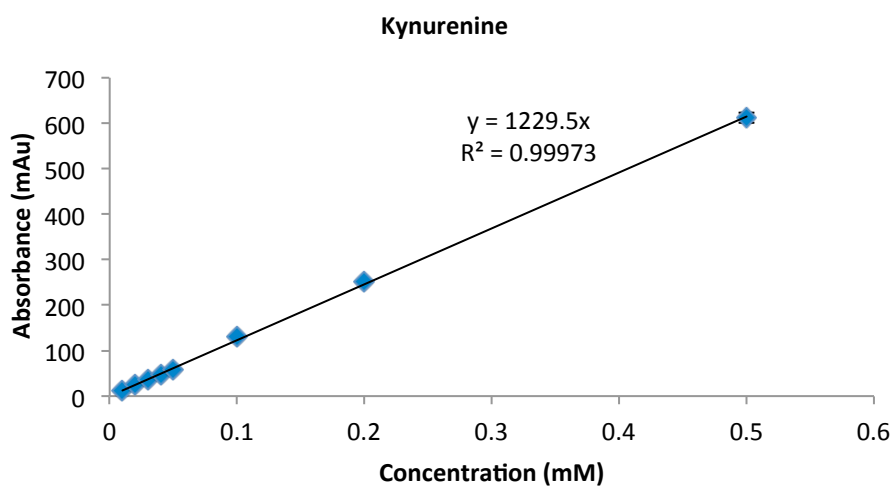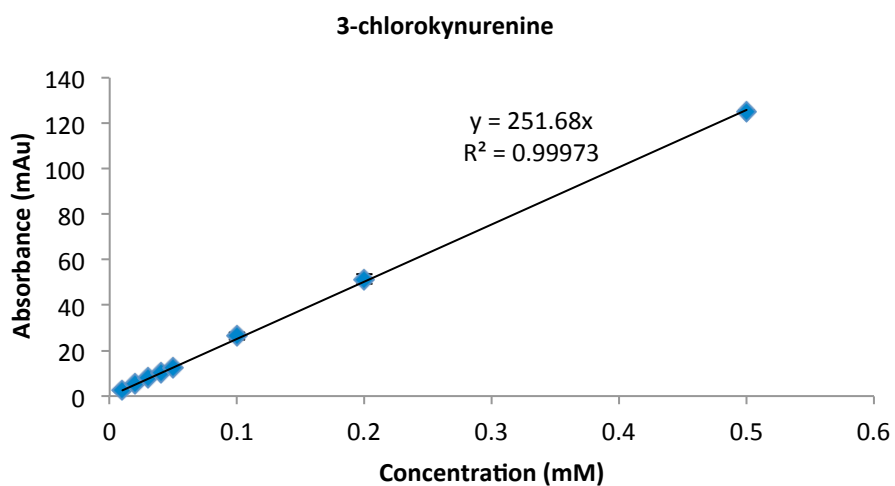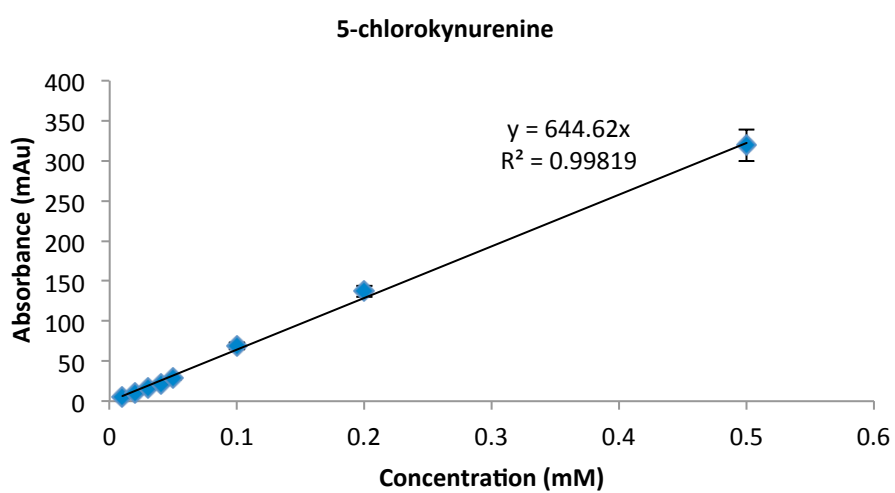

Figure S5 Kynurenine HPLC calibrations

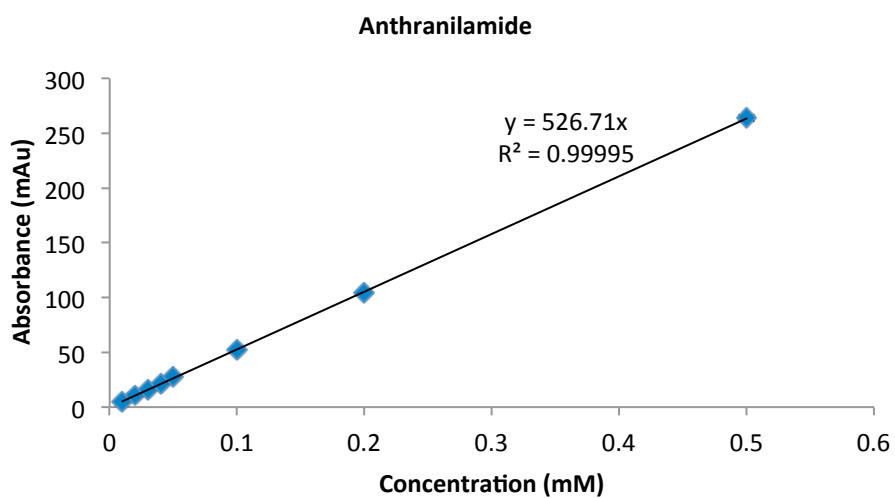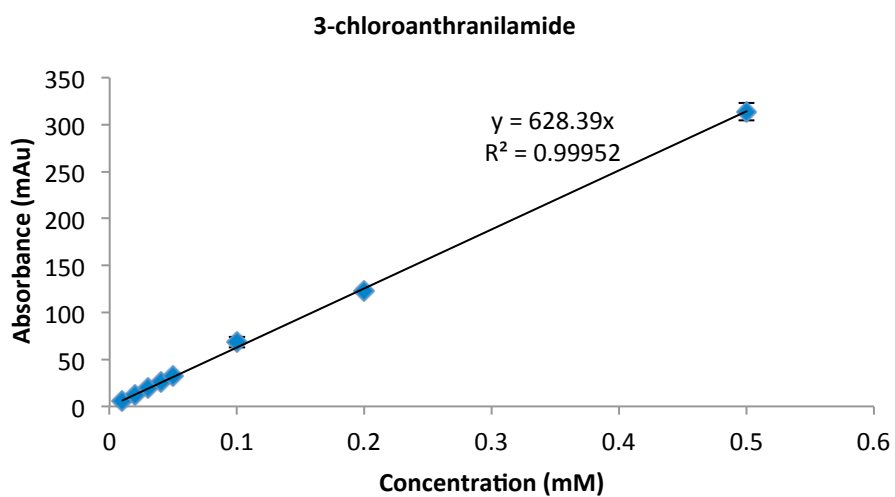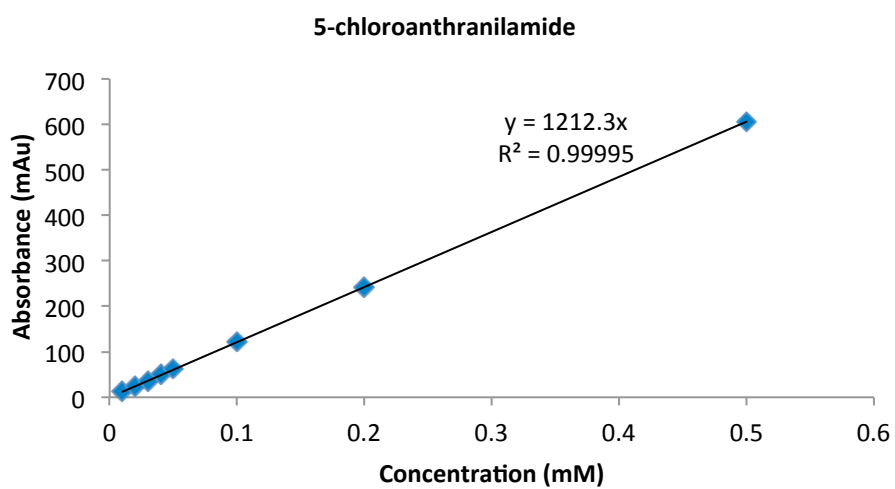

**Figure S6** Anthranilamide HPLC calibrations



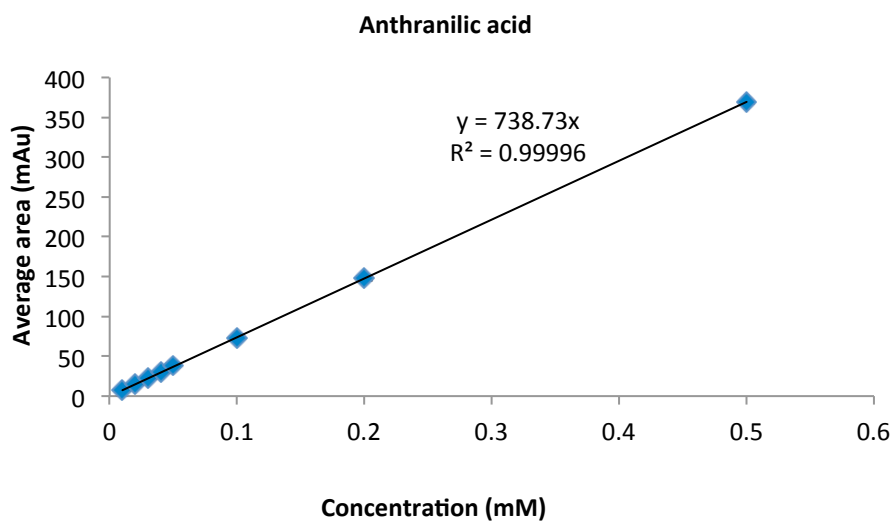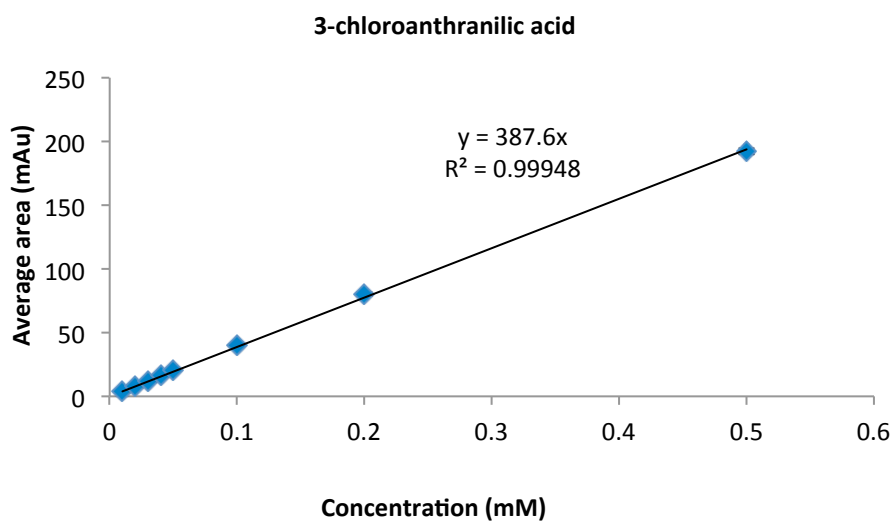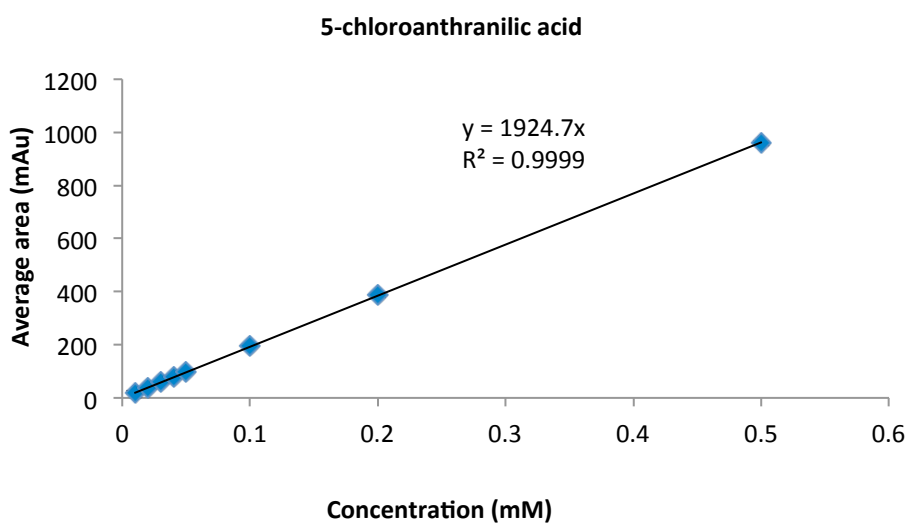

**Figure S7** Anthranilic acid HPLC calibrations

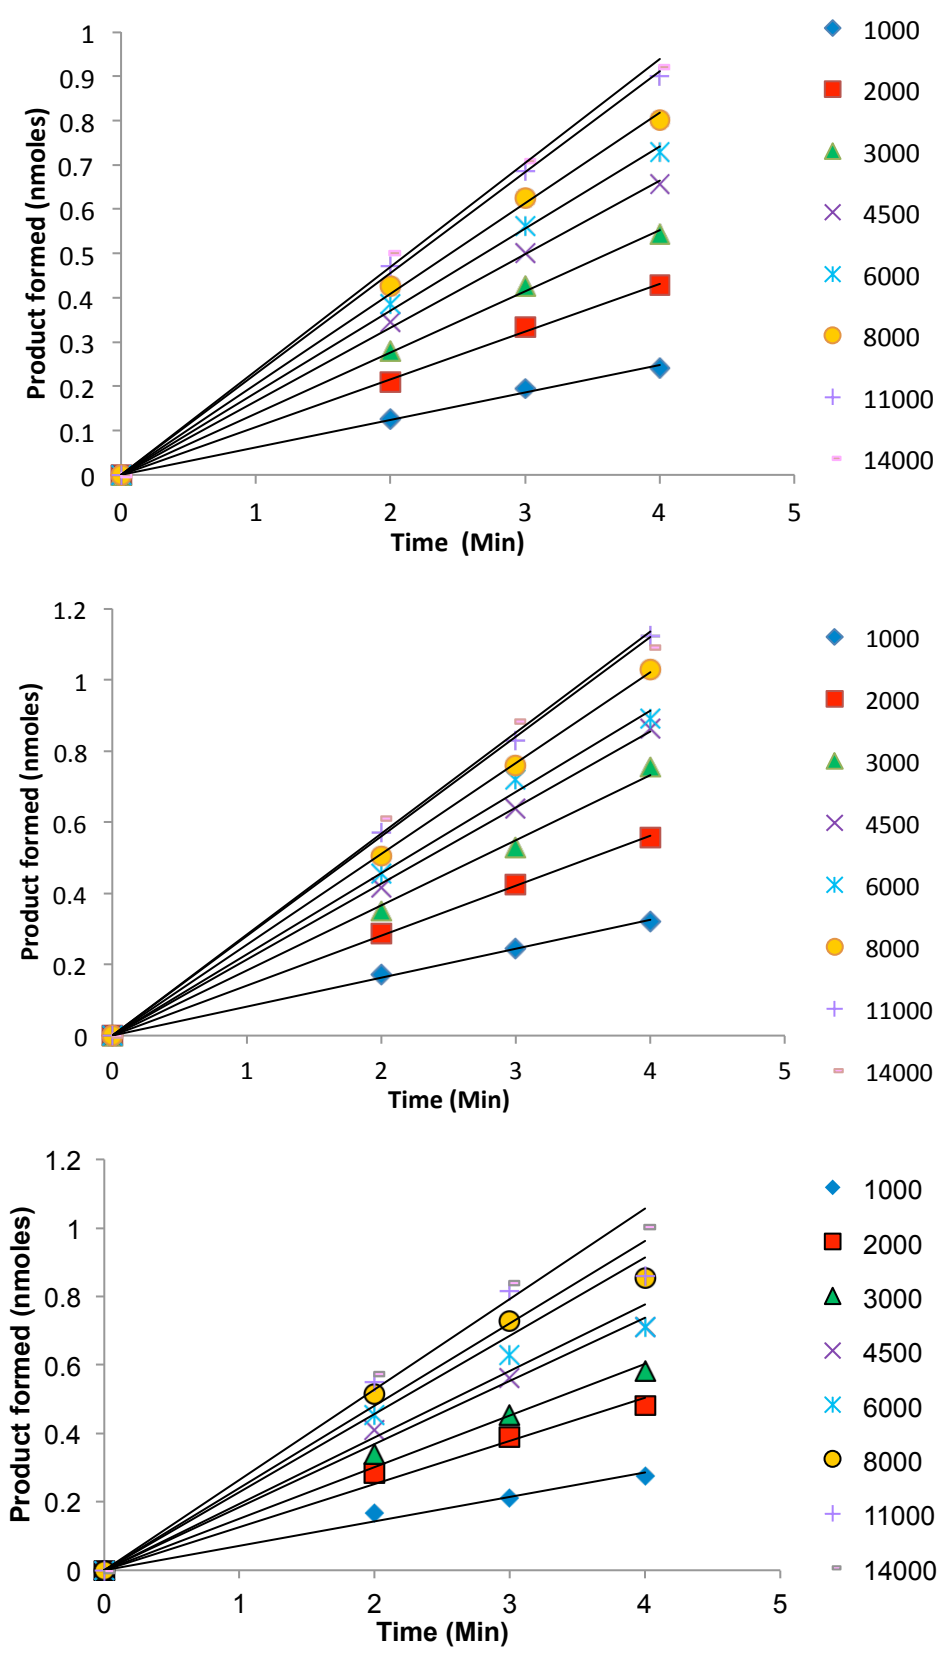

Figure S8 Representative kinetic data - Rate graphs - PrnA wild-type with anthranilamide (3)

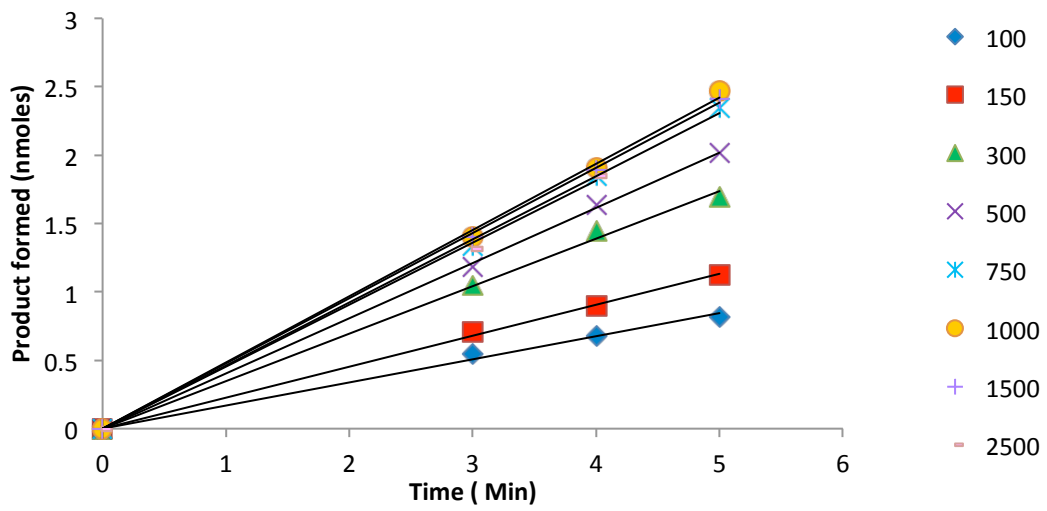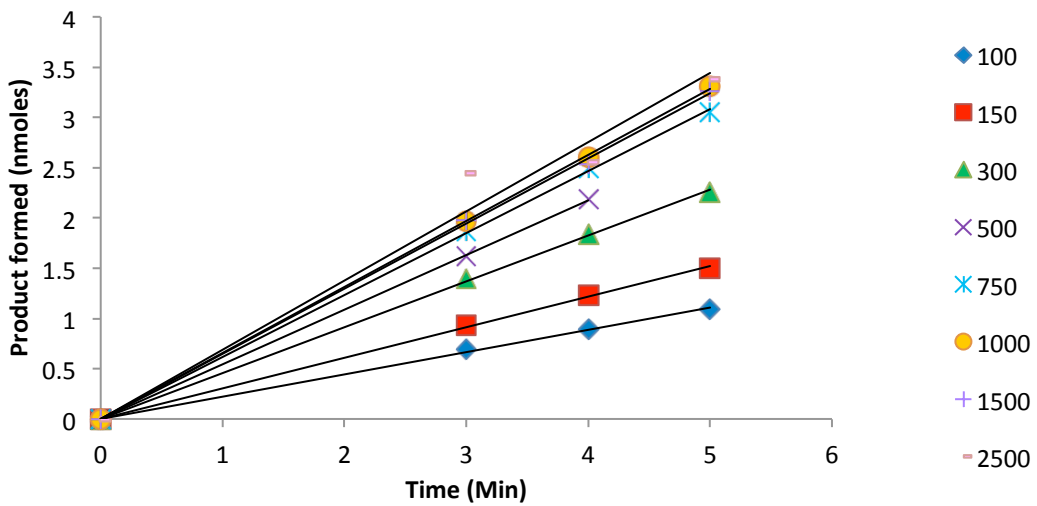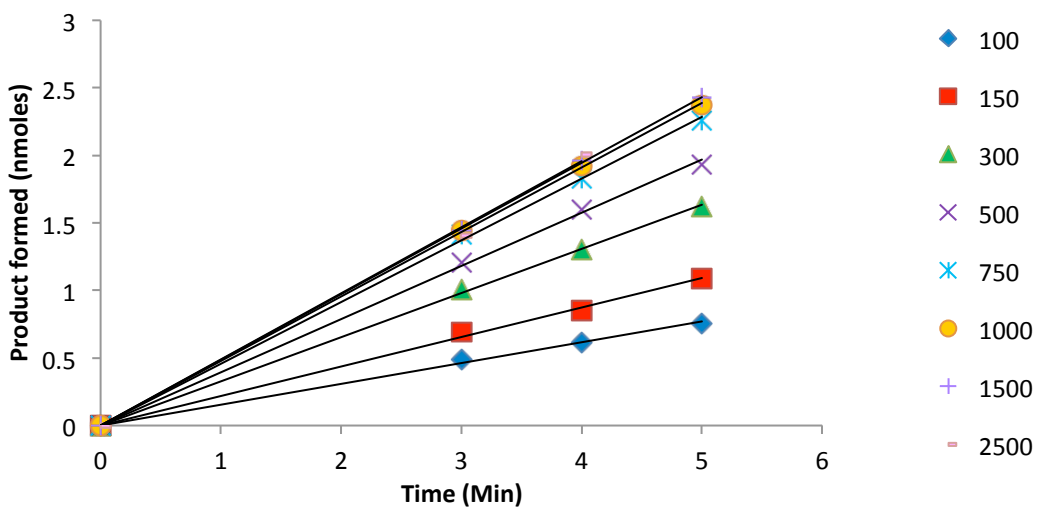

Figure S9 Representative kinetic data - Rate graphs - PrnA E450K F454K with anthranilic acid (4)

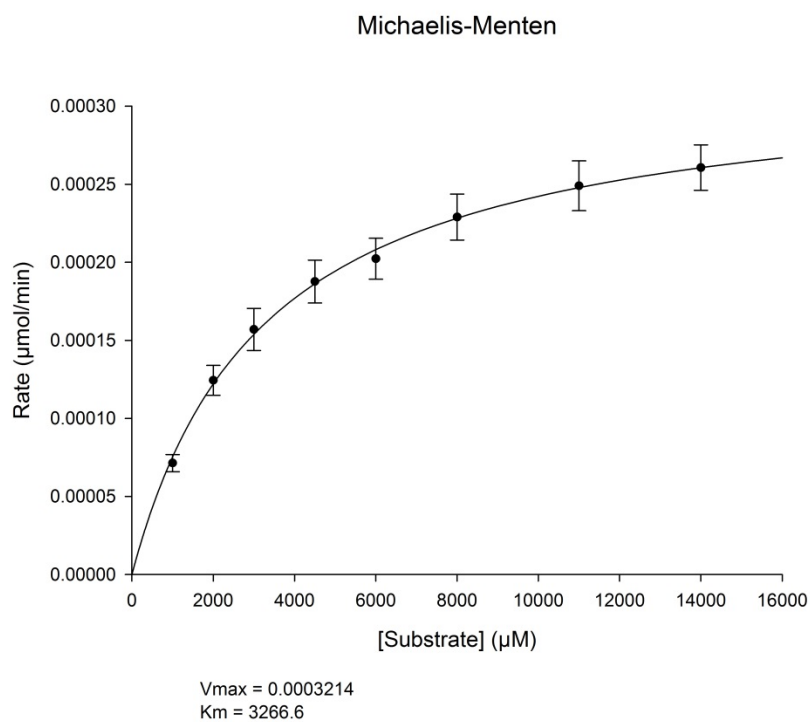

**Figure S10** - Michaelis-Menten graph of PrnA wild-type with anthranilamide (**3**)

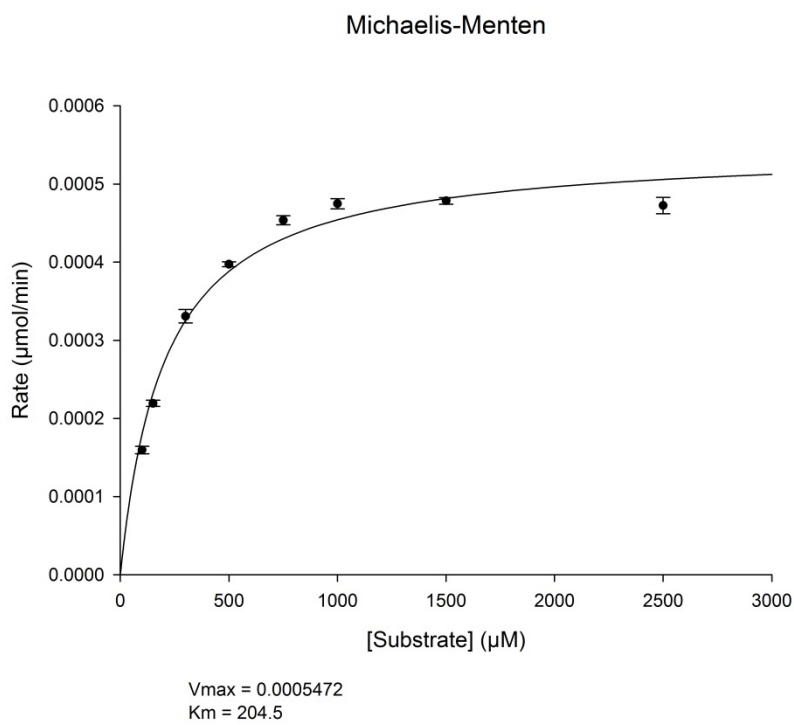

**Figure S11** - Michaelis-Menten graph of PrnA E450K F454K with anthranilic acid (**4**)

# Original data

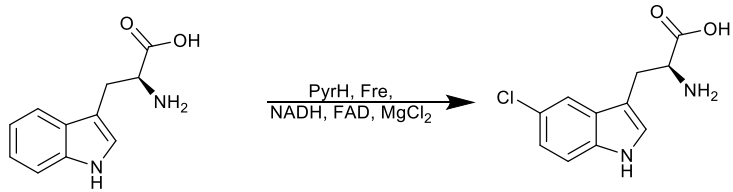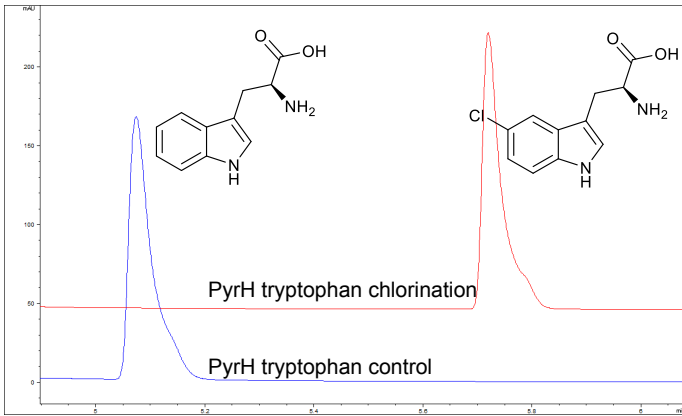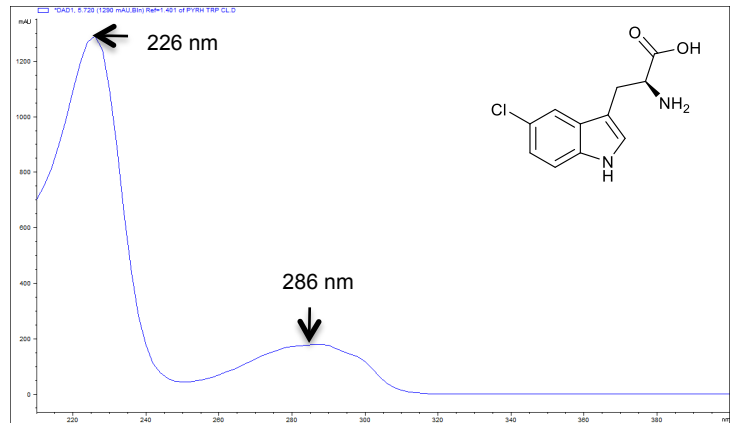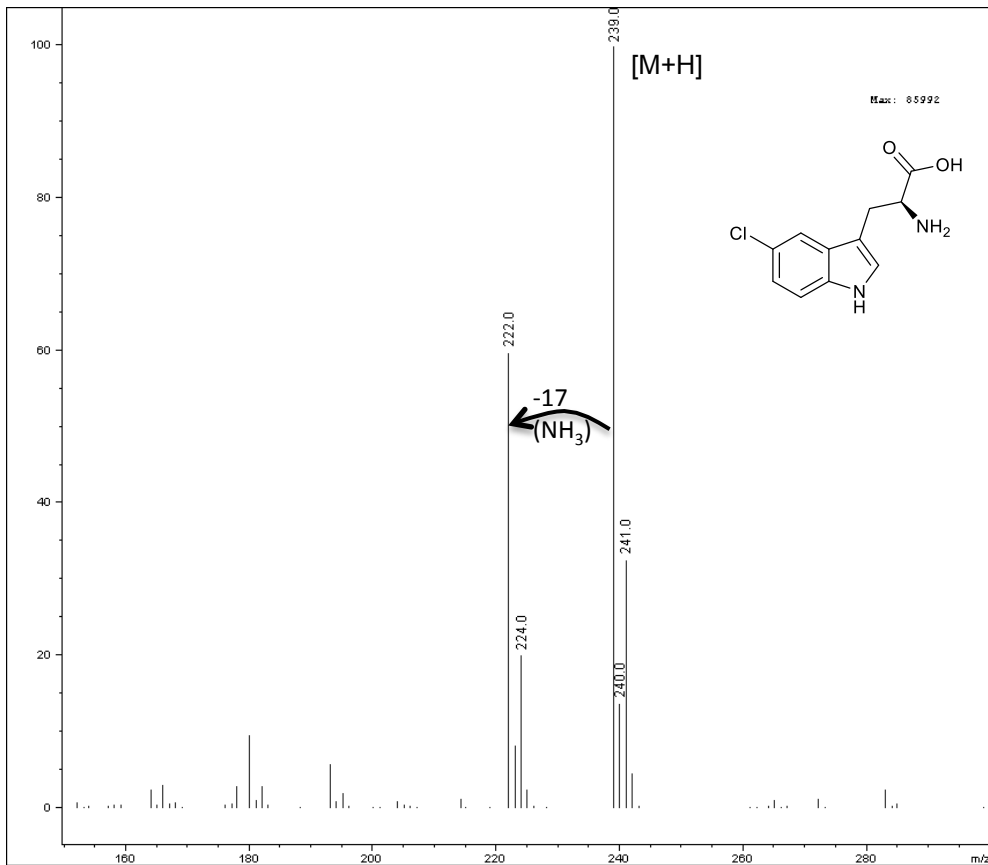

PryH Trp

20140926\_RAS\_004 23 (0.382) AM (Cen,4, 20.00, Ar,5000.0,556.28,1.00); Sb (15,10.00 ); Sm (SG, 3x5.00); Cm (23:32)

TOF MS ES+  
1.49e5

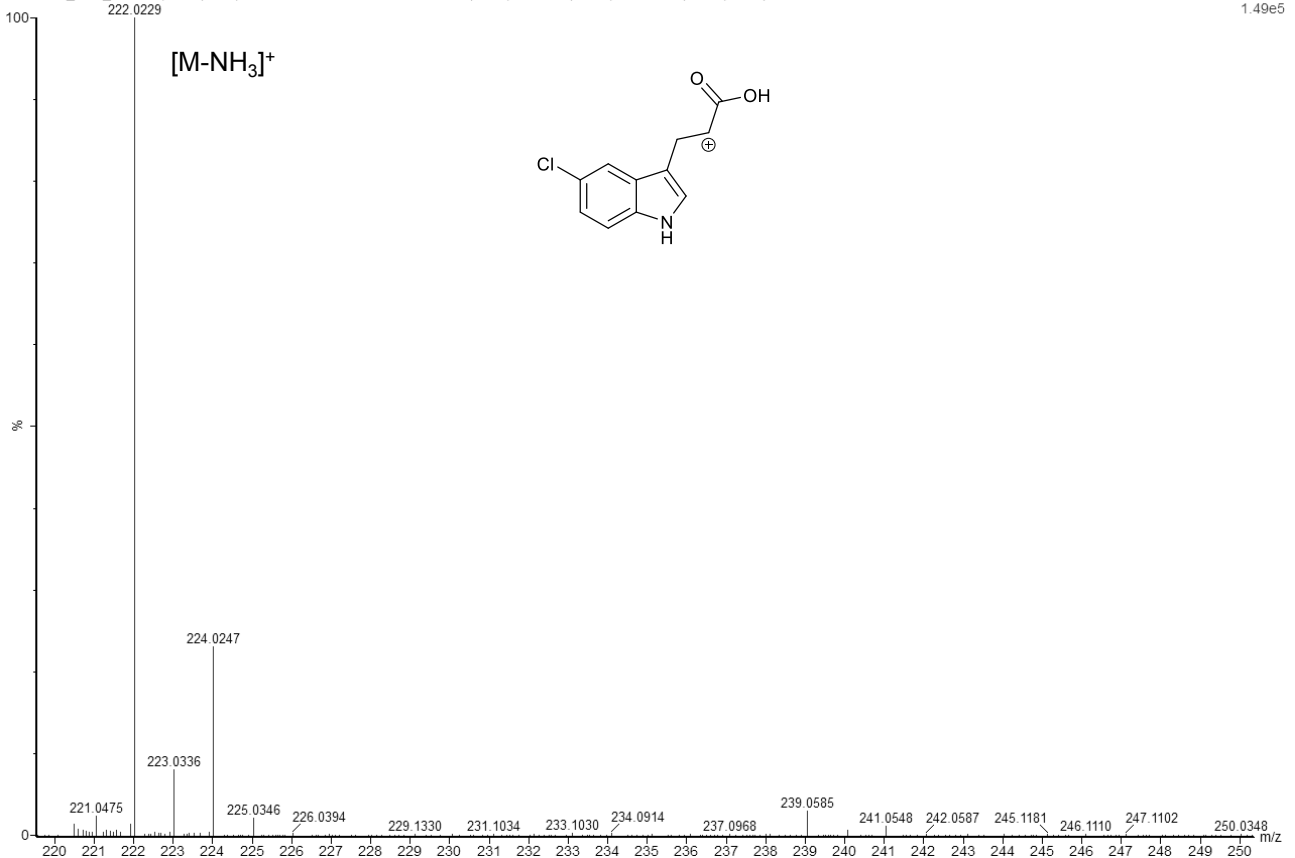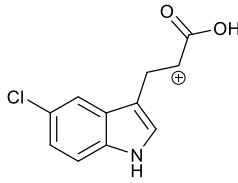

PyrH Tryptophan Cl

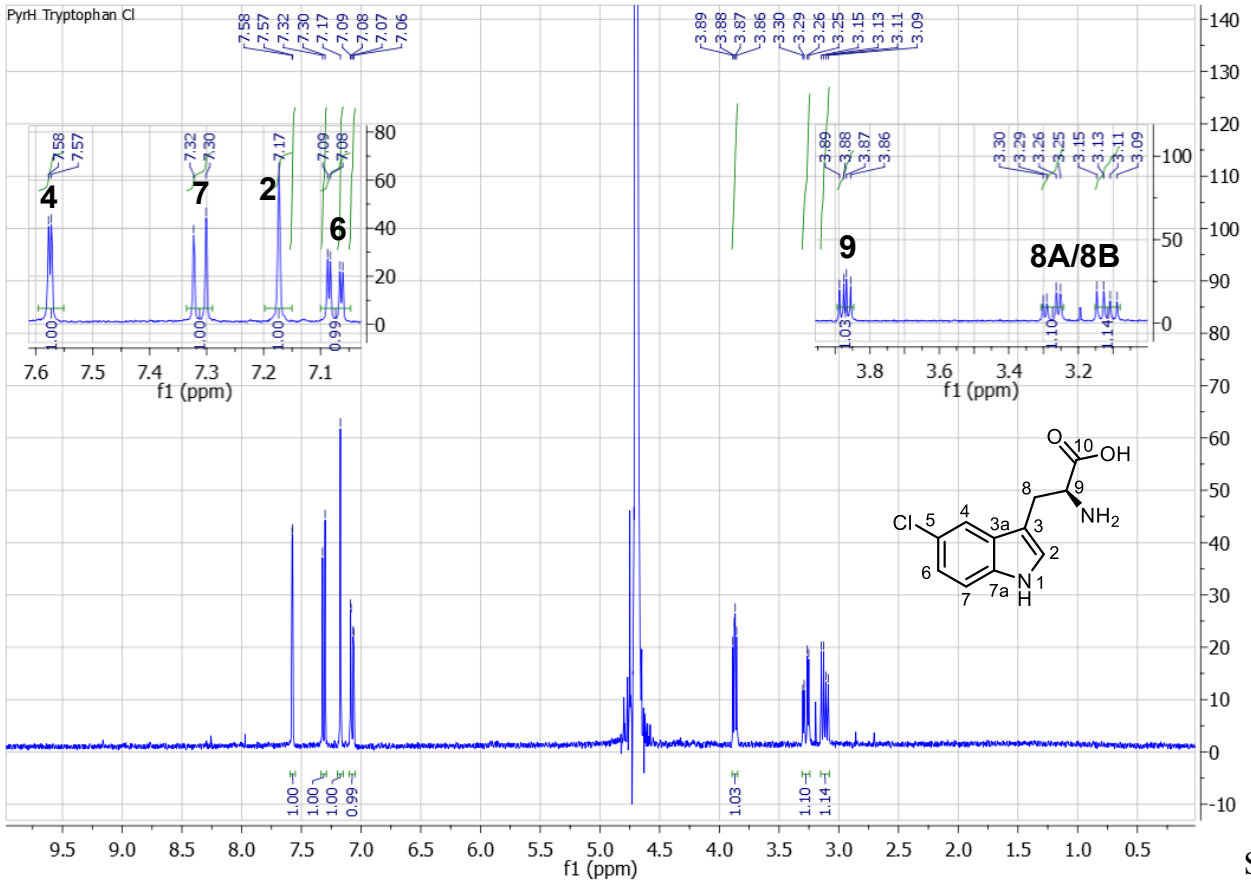

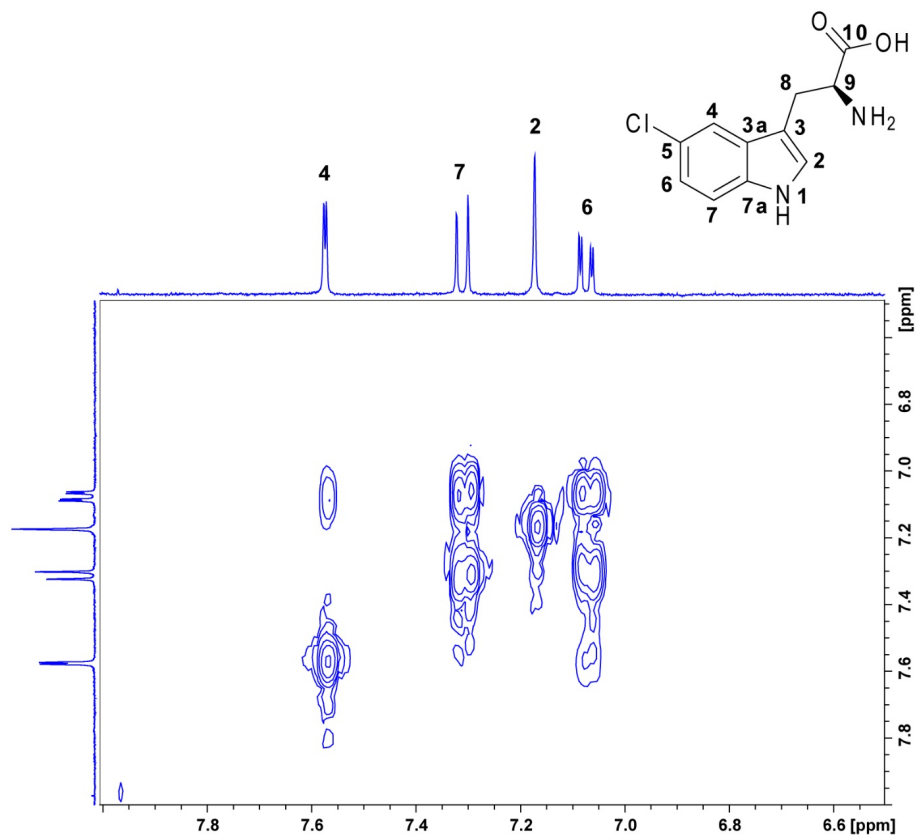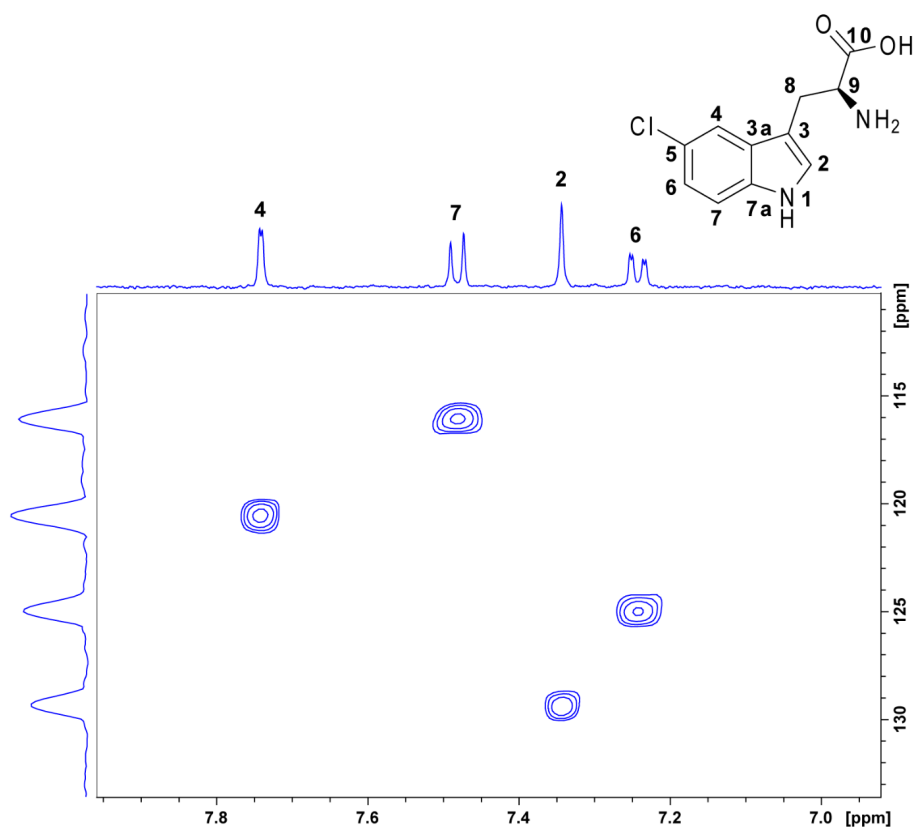

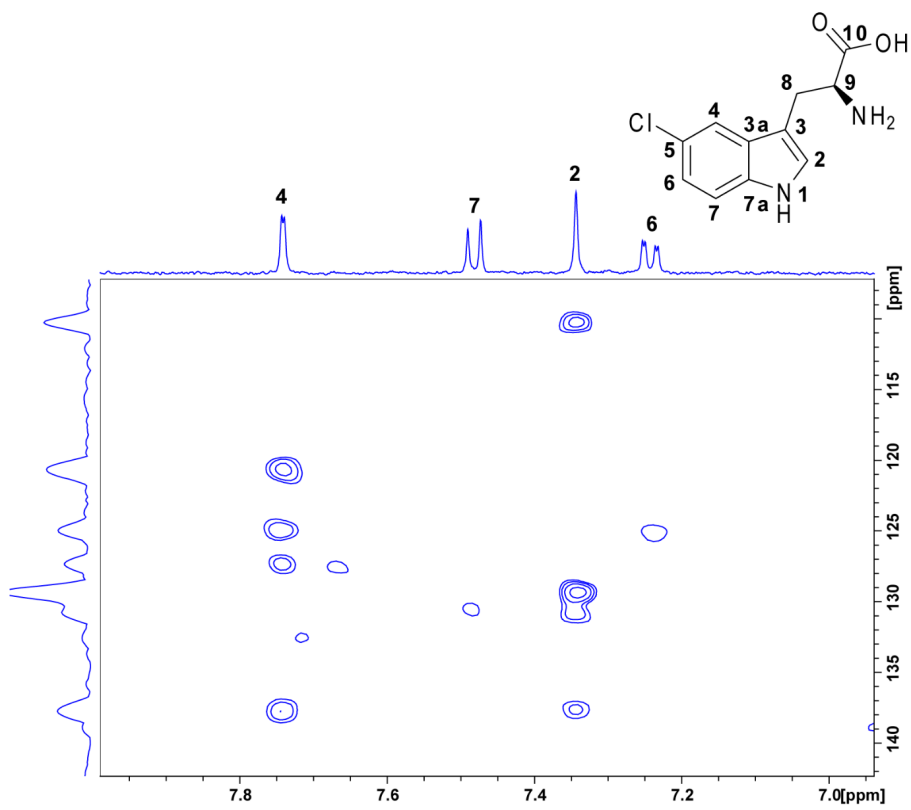

HMBC of 5-chlorotryptophan



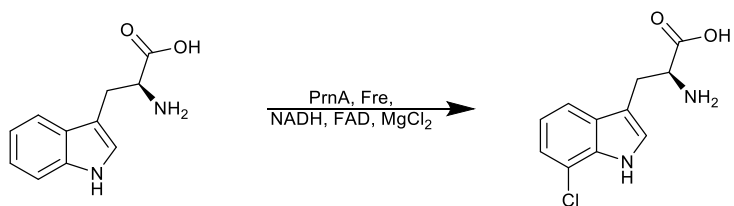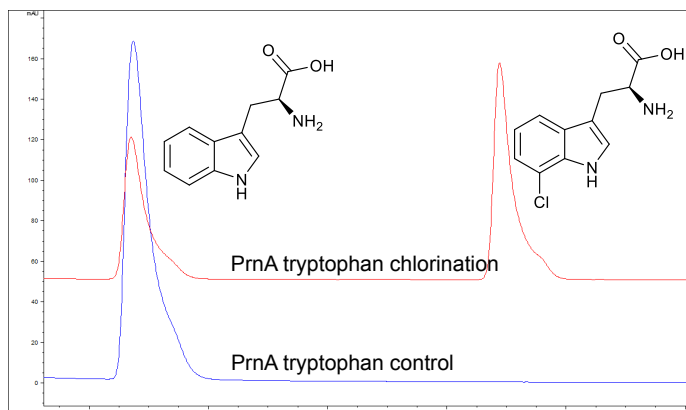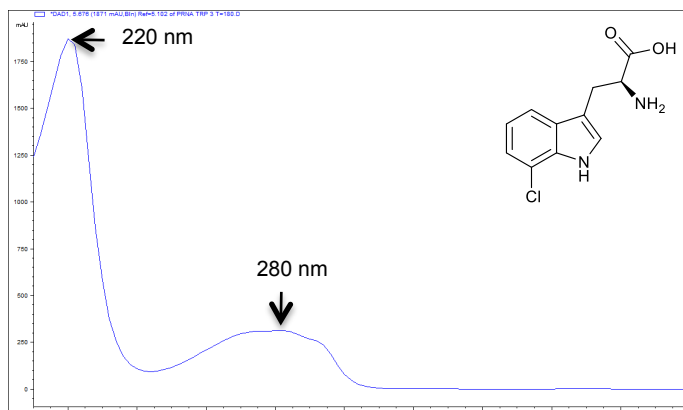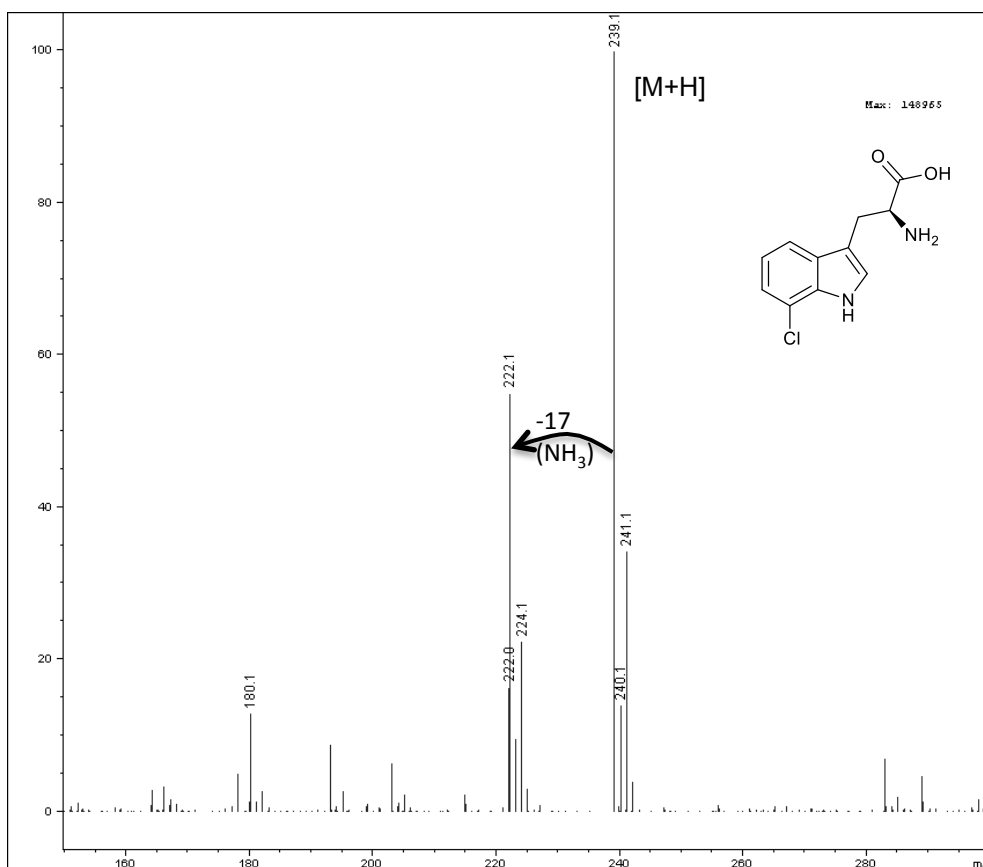

PmA\_Trp\_Cl #310 RT: 2.41 AV: 1 NL: 2.81E8  
T: FTMS + p ESI Full ms [80.00-500.00]

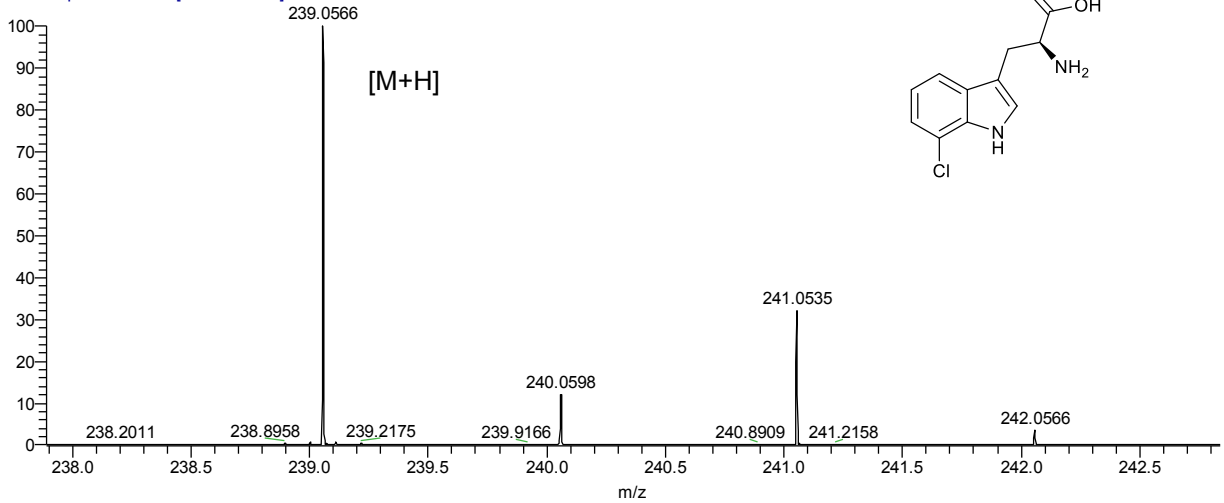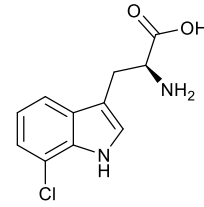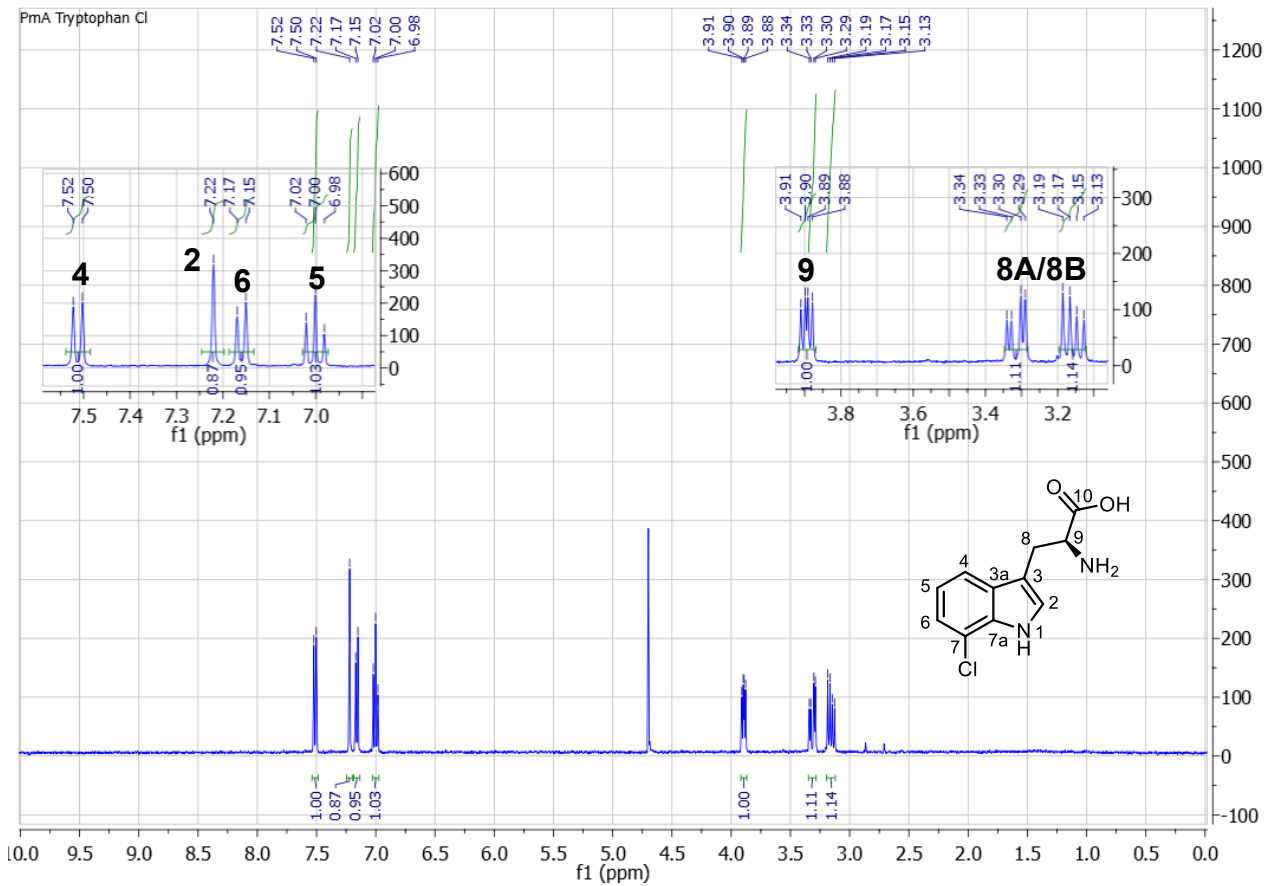

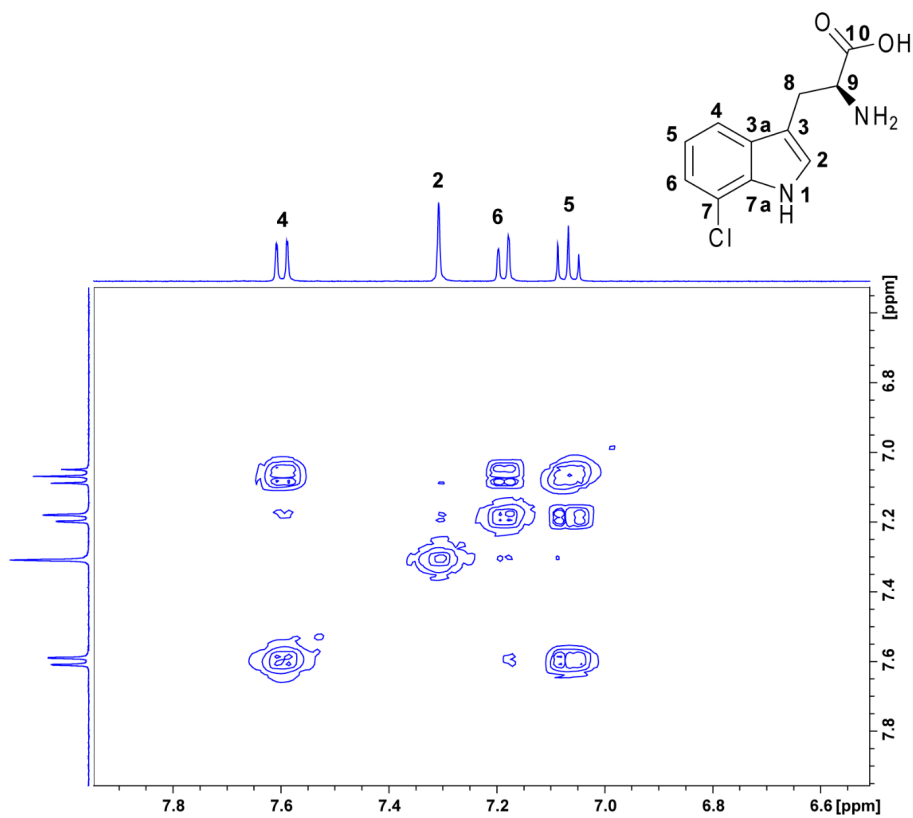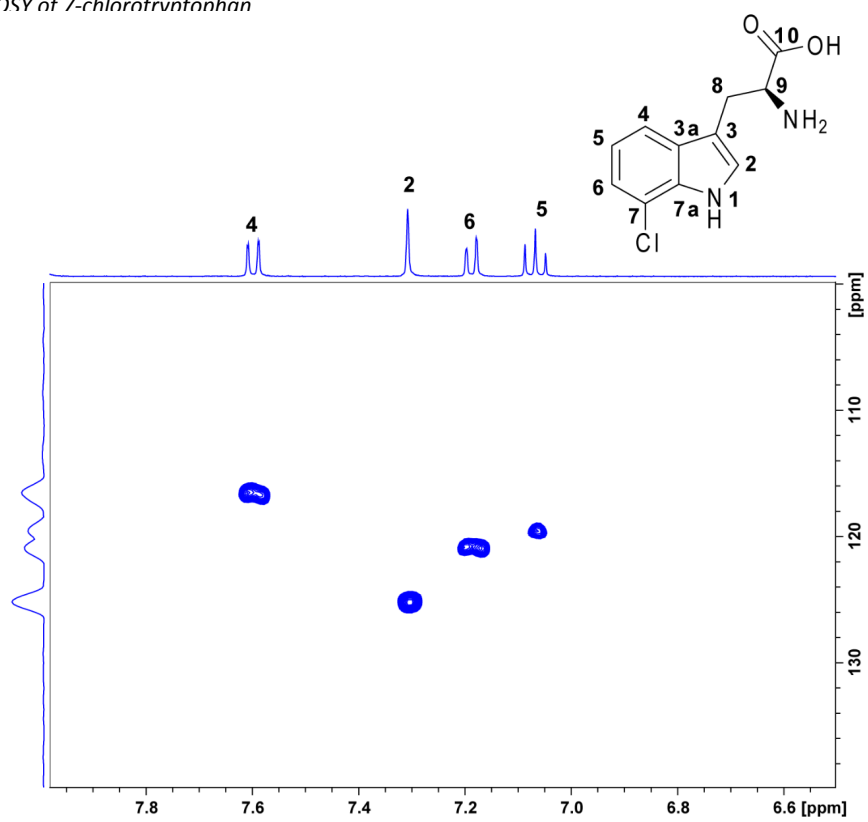

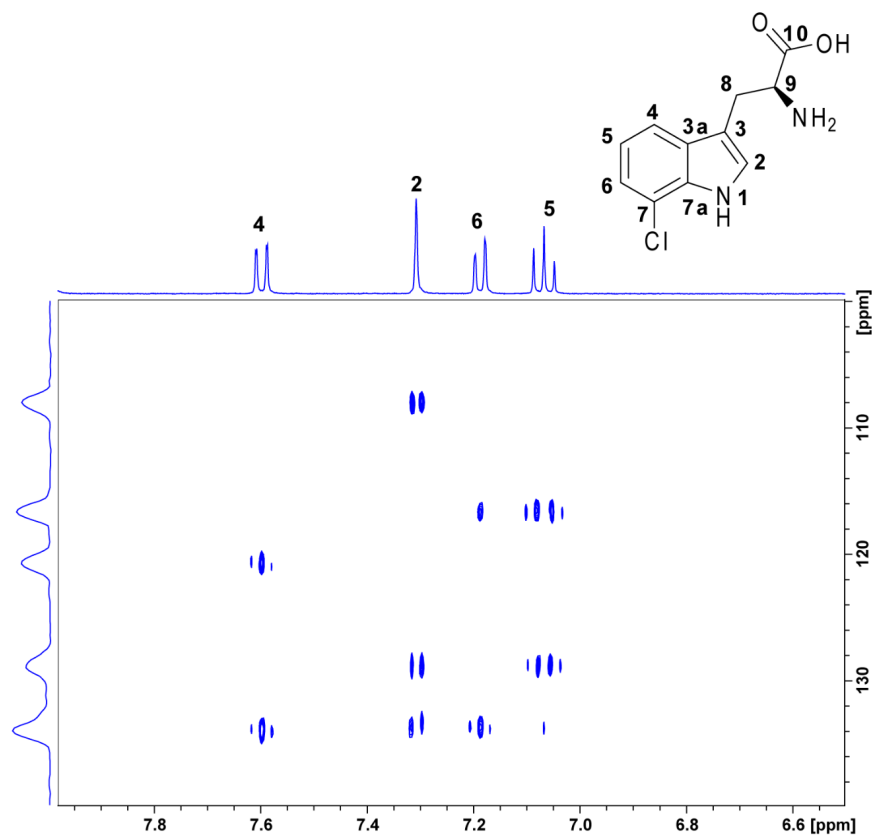

HMBC of 7-chlorotryptophan

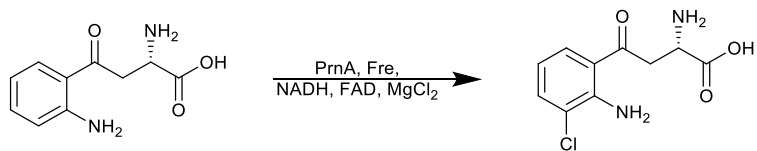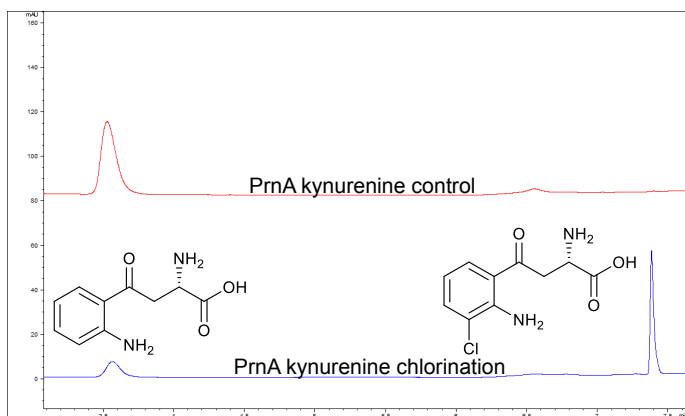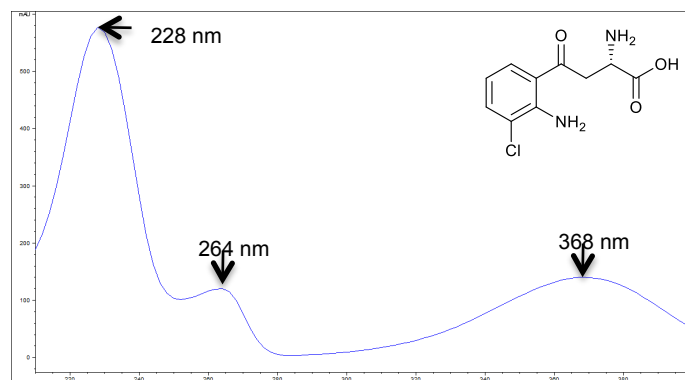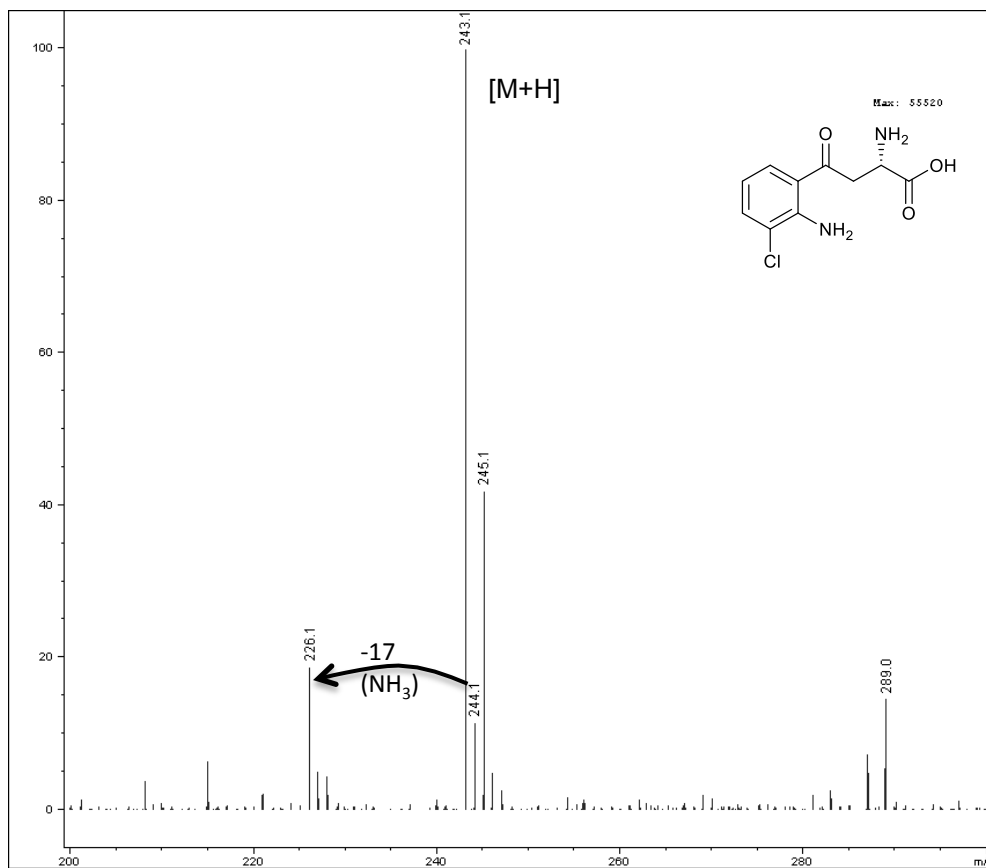

PmA\_3Kyn\_Cl #263 RT: 2.05 AV: 1 NL: 2.71E8  
T: FTMS + p ESI Full ms [80.00-500.00]

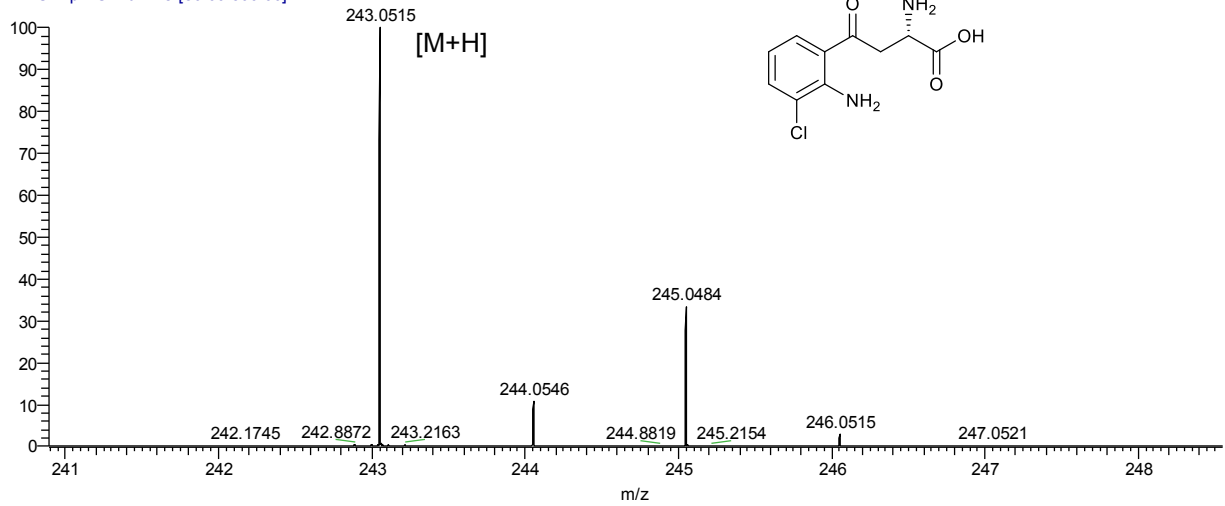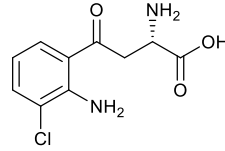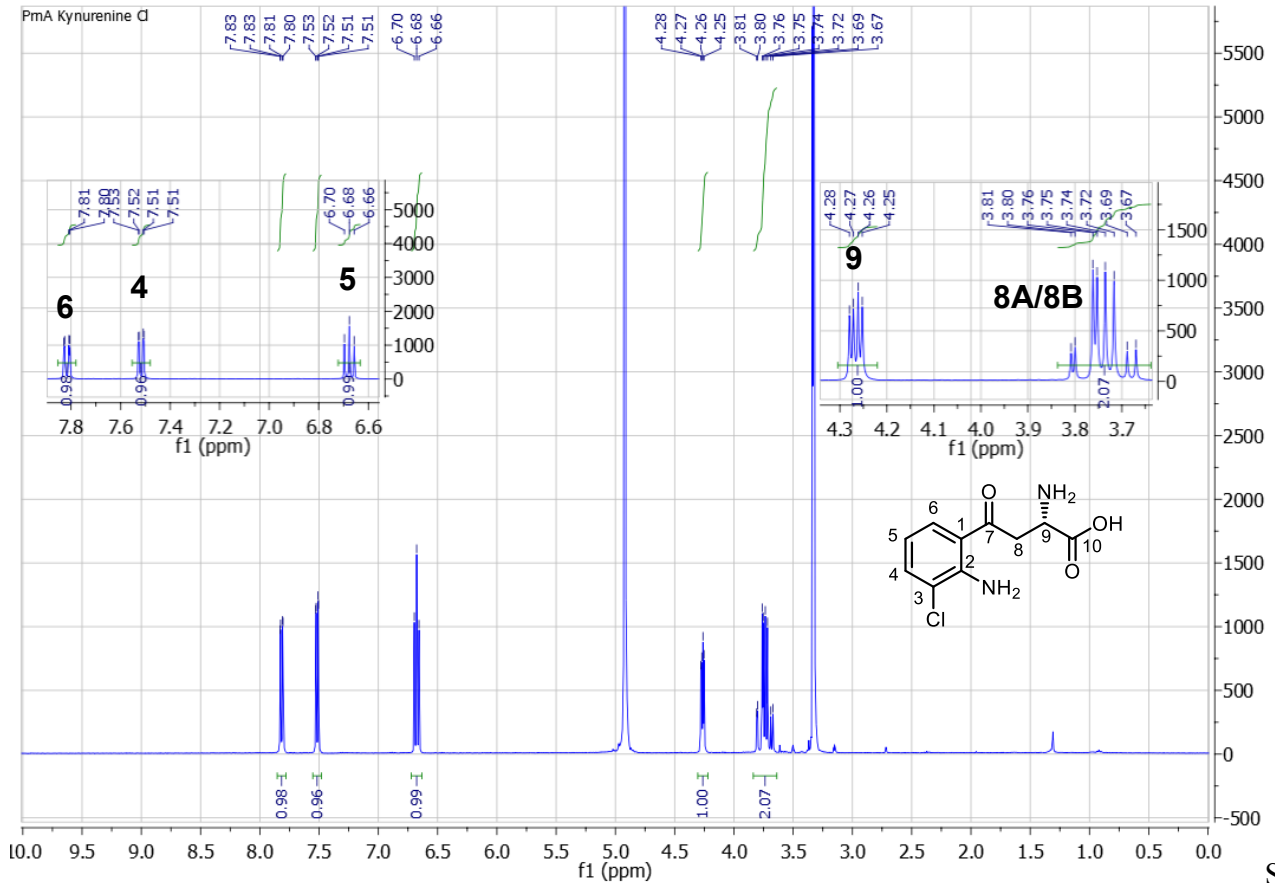

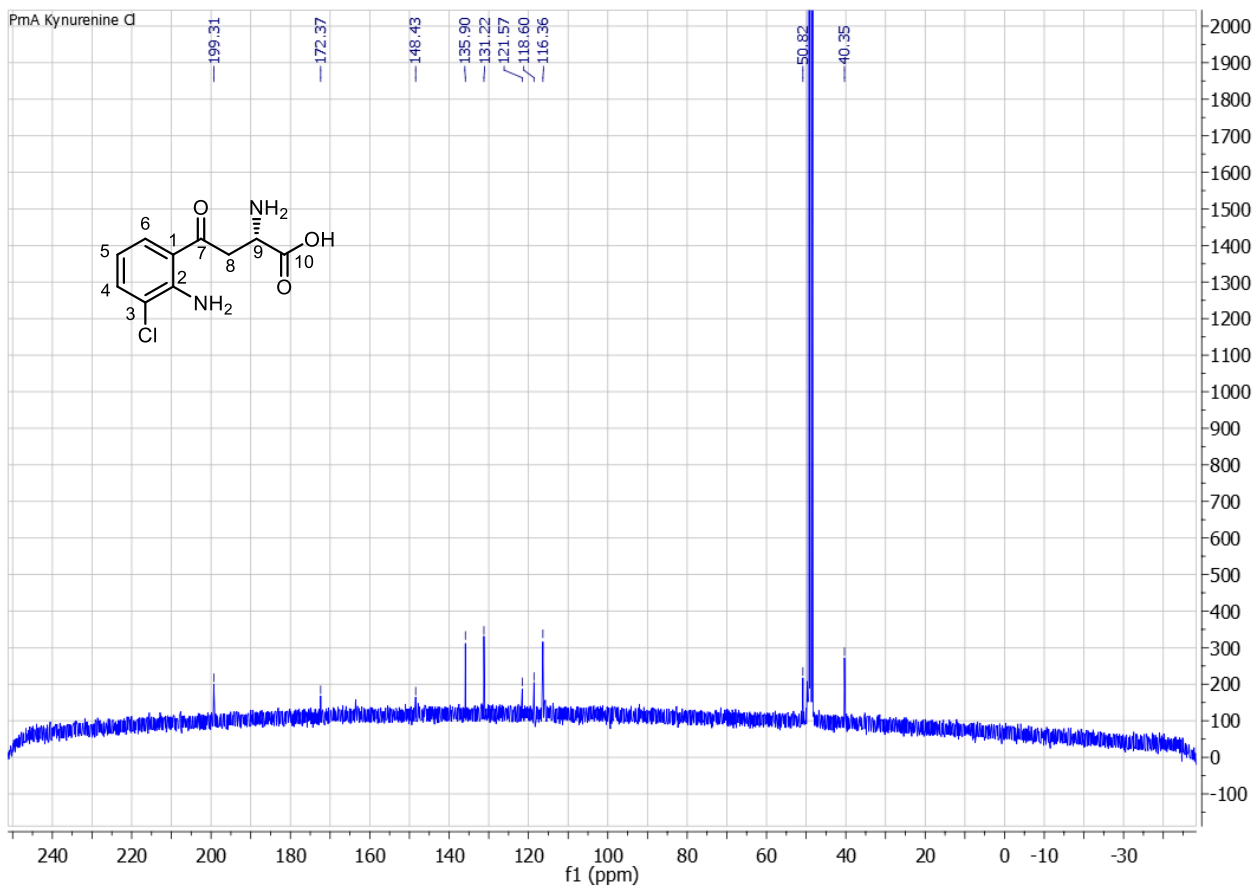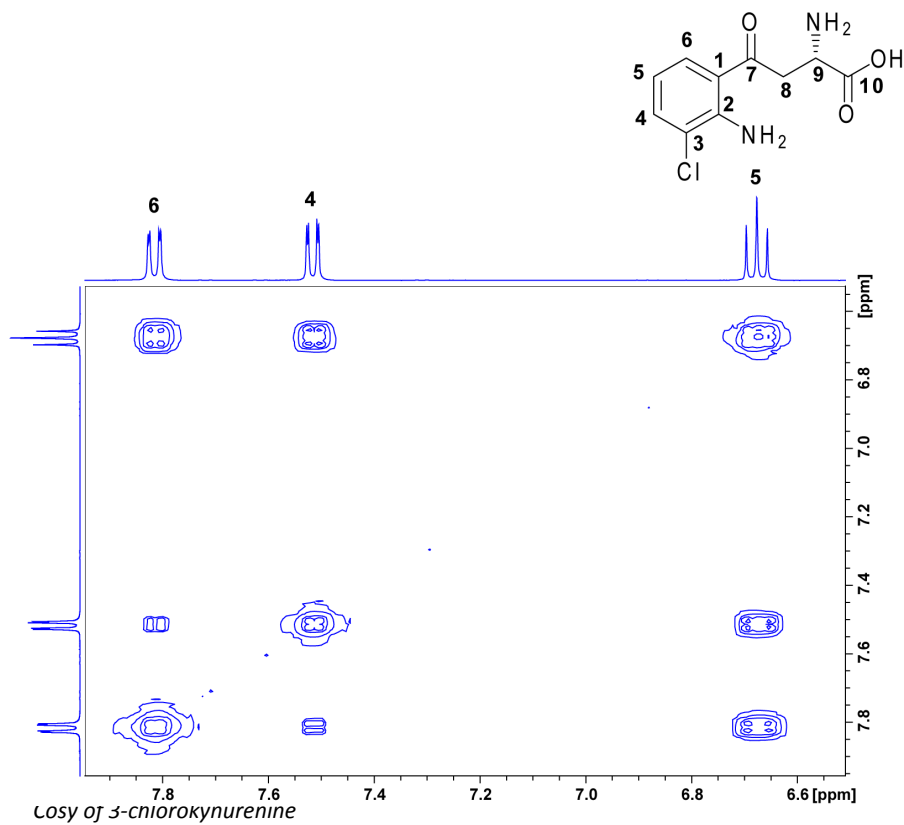

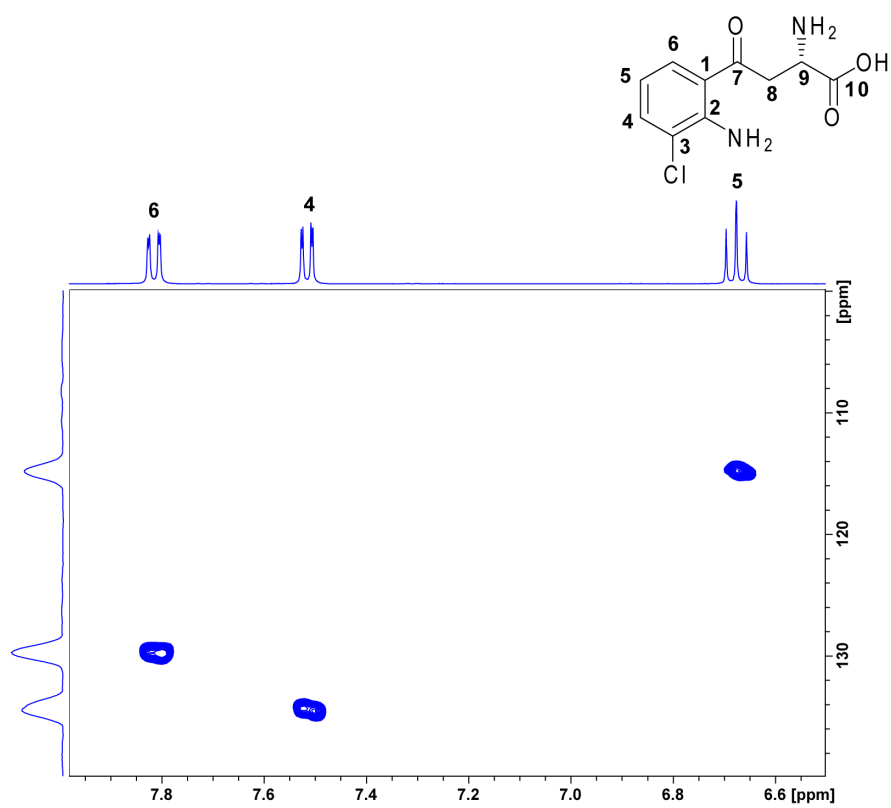

HMQC of 3-chlorokynurenine



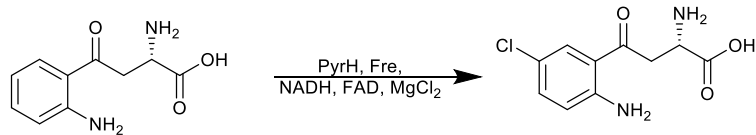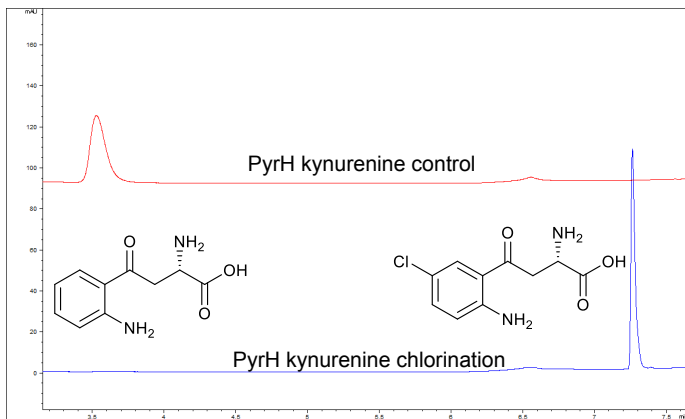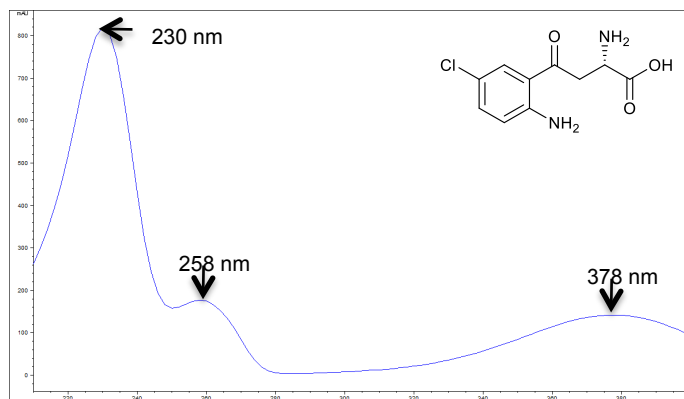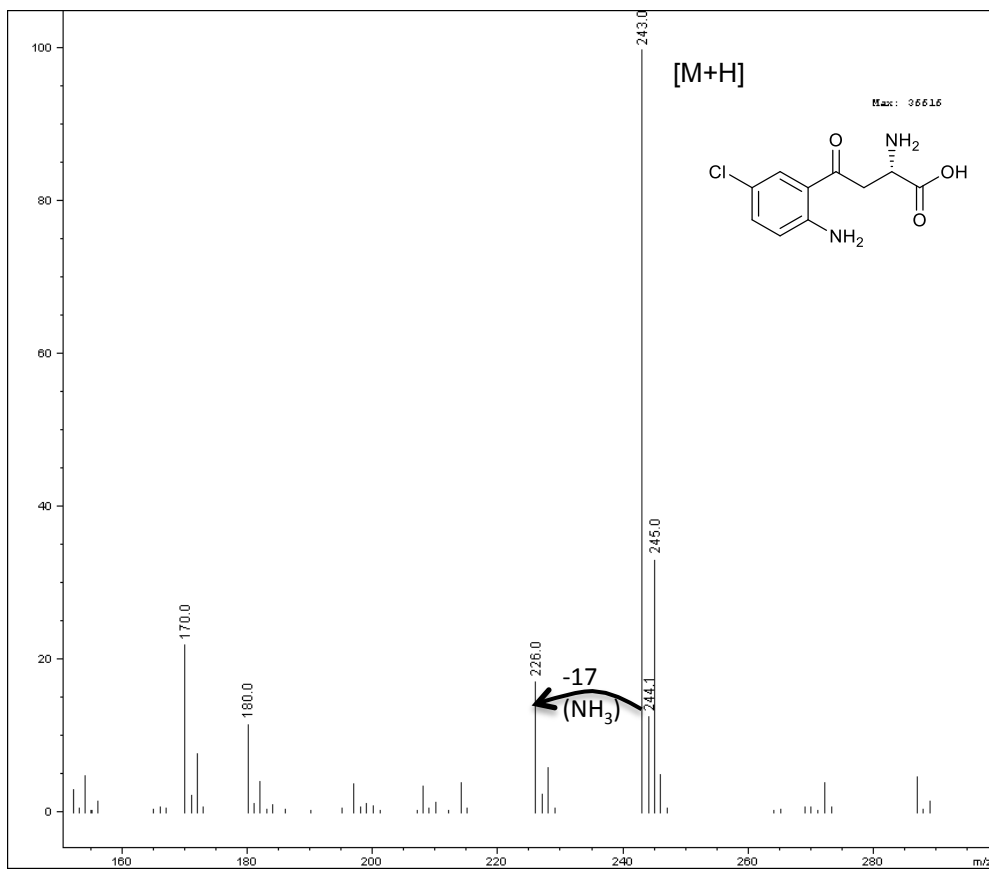

PyrH\_5Kyn\_Cl #261 RT: 2.03 AV: 1 NL: 1.93E8  
T: FTMS + p ESI Full ms [80.00-500.00]

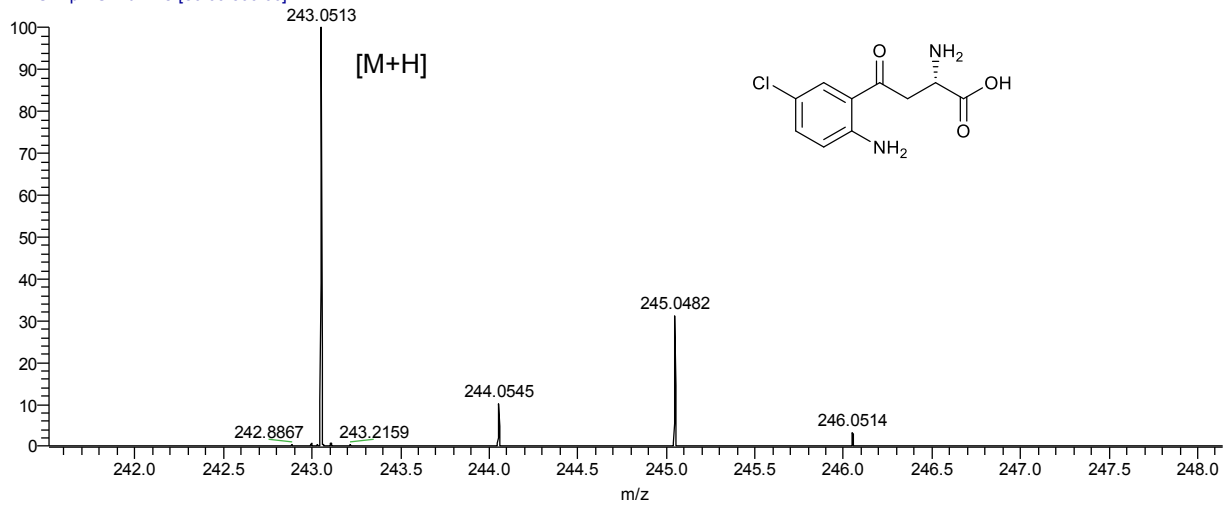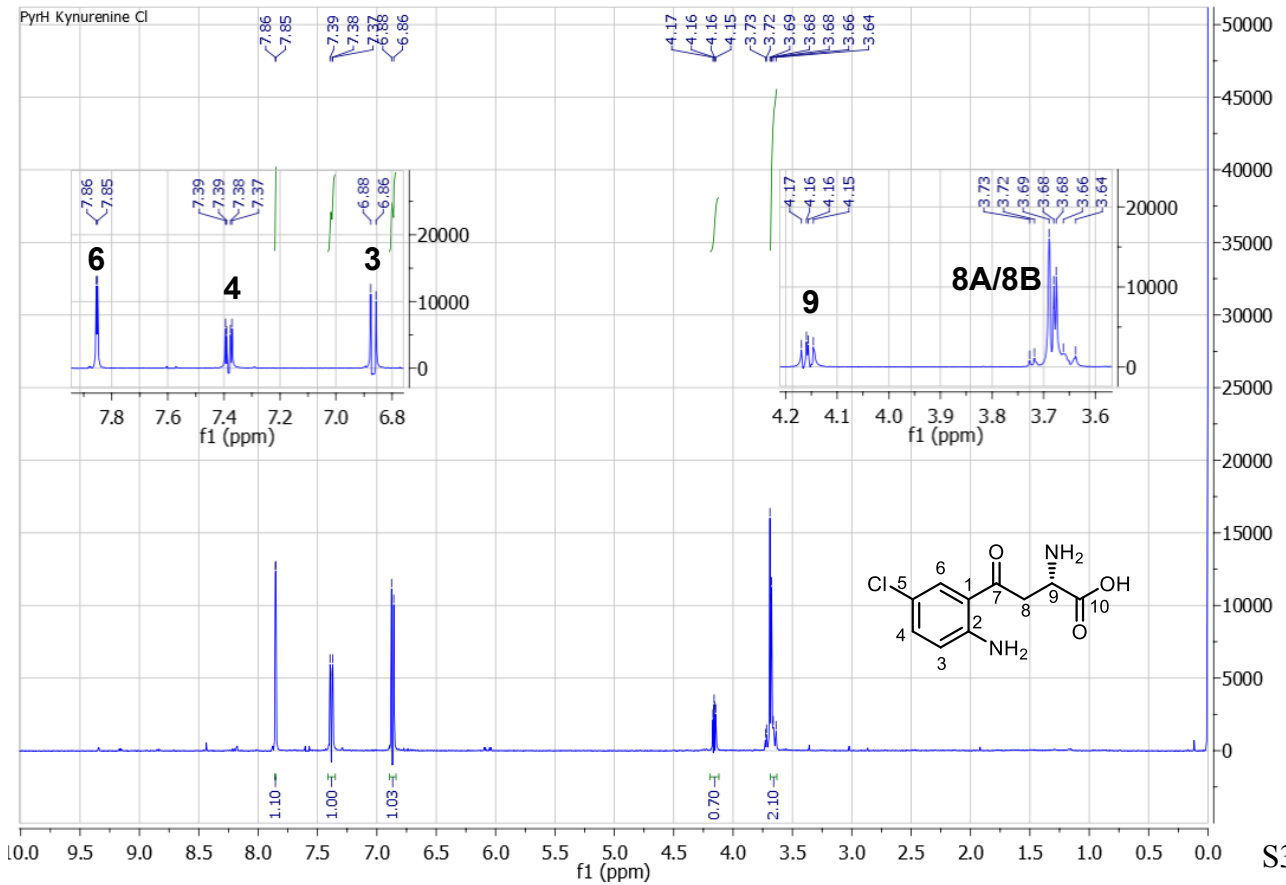

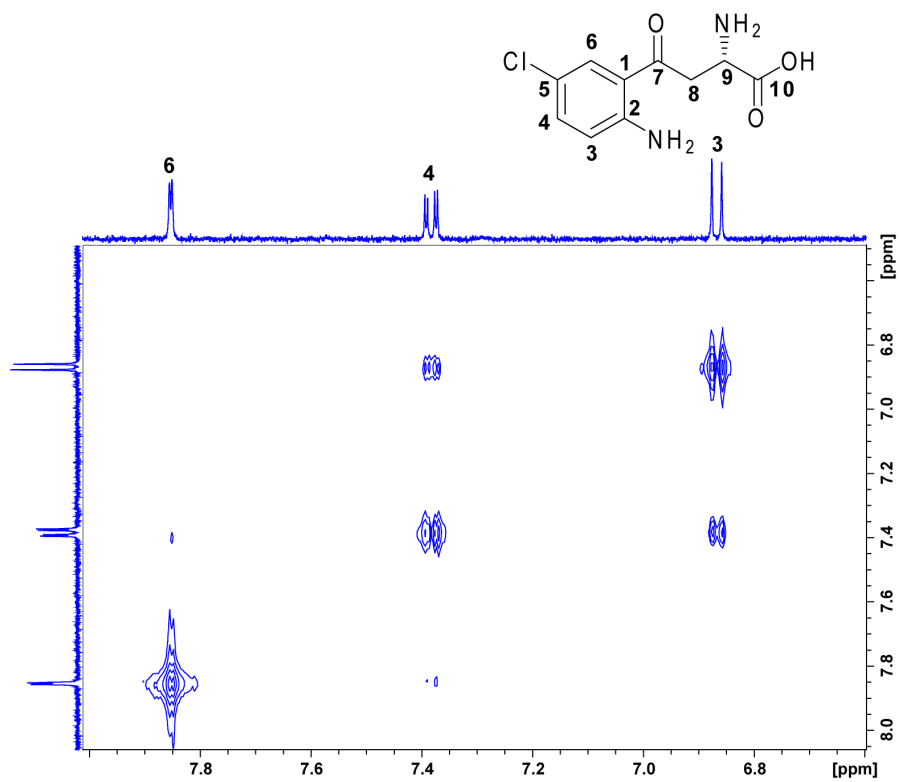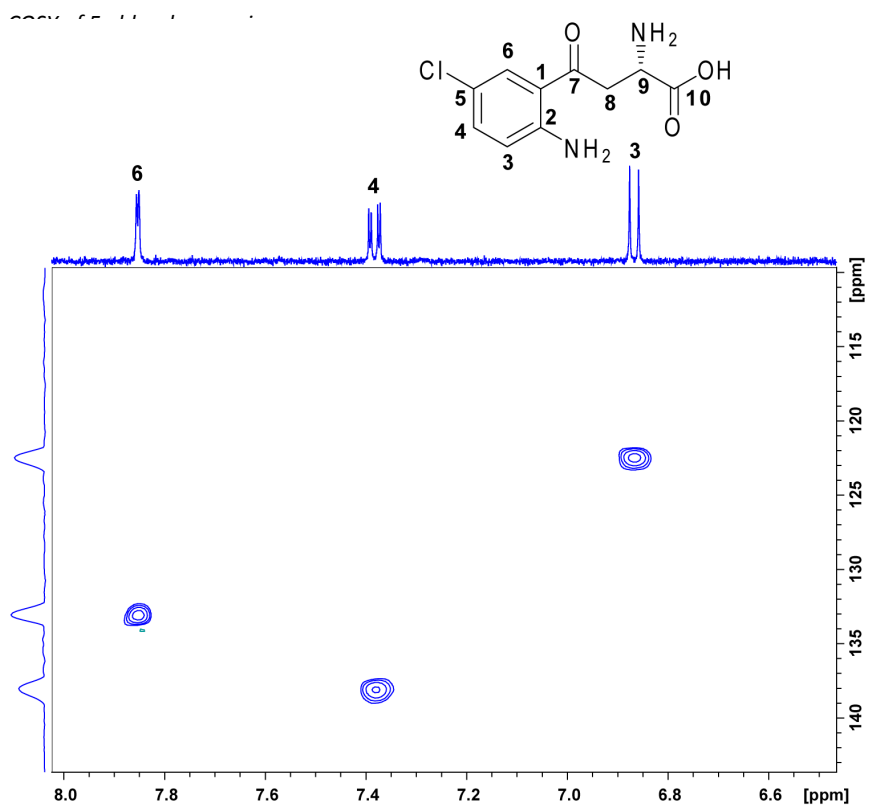

HSQC of 5-chlorokynurenine

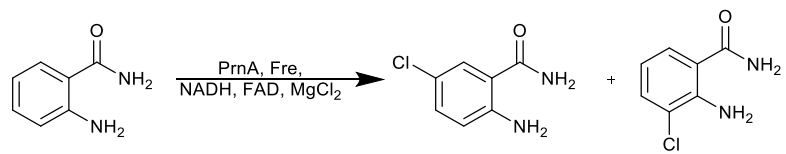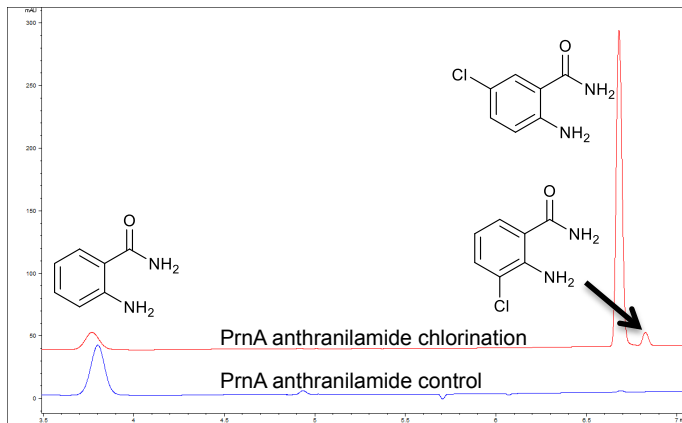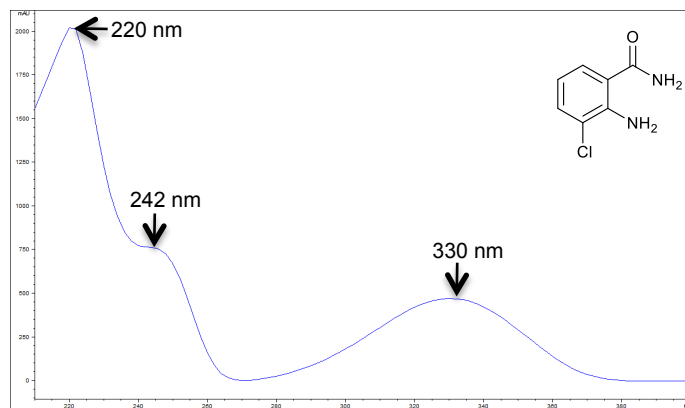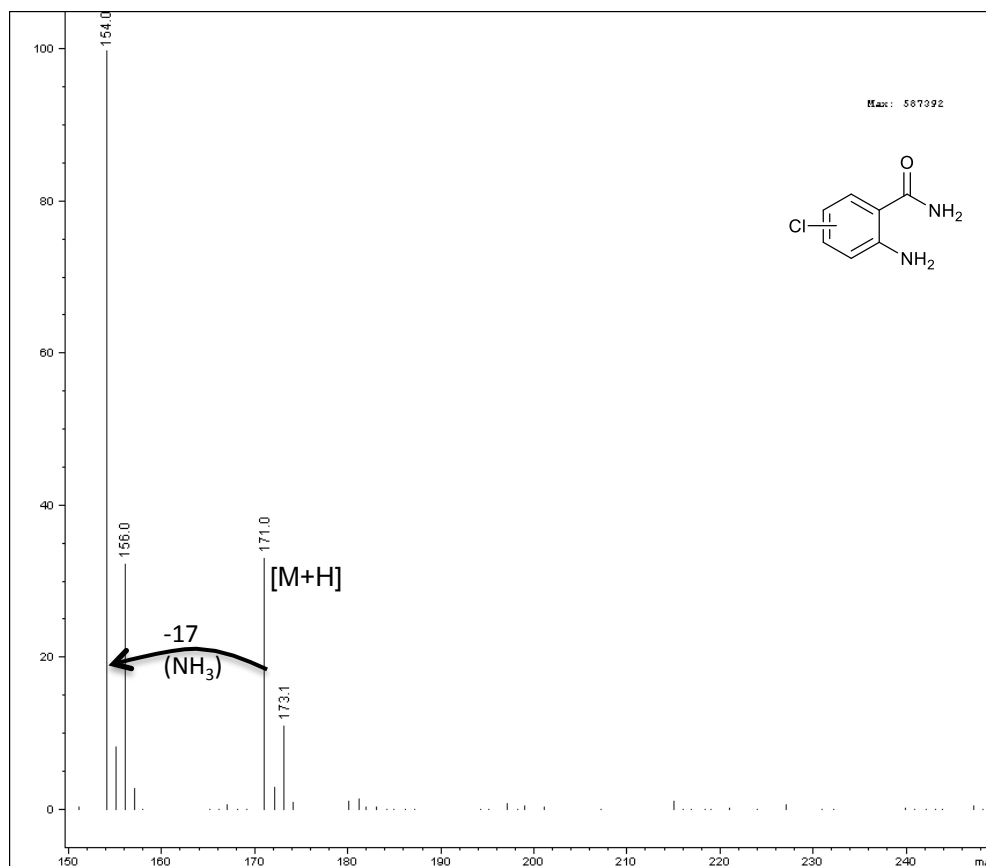

PmA\_3Anth\_Cl #399 RT: 3.11 AV: 1 NL: 7.25E8  
T: FTMS + p ESI Full ms [80.00-500.00]

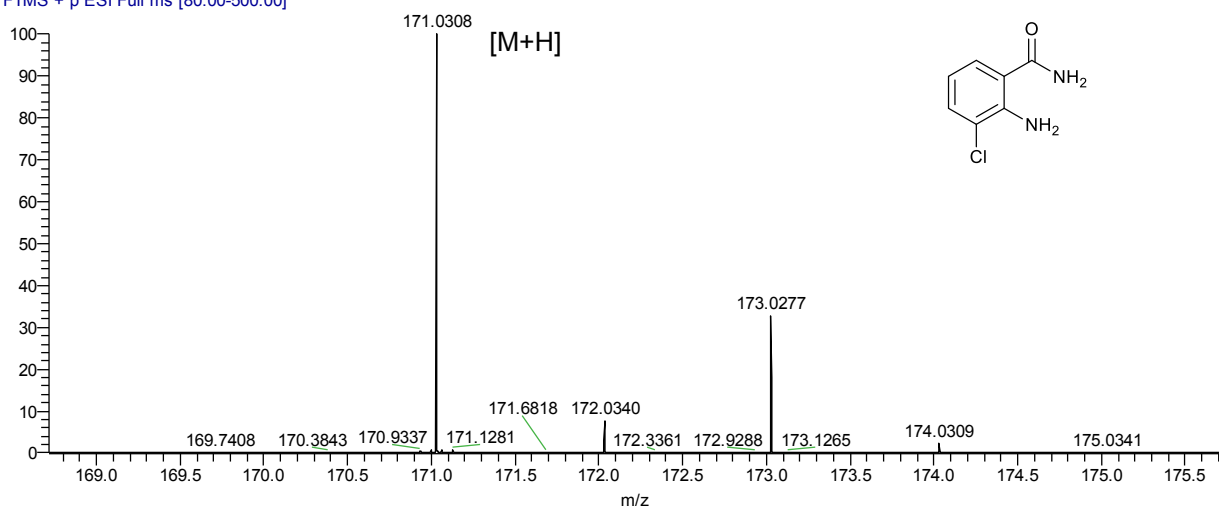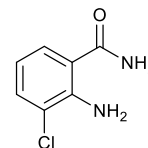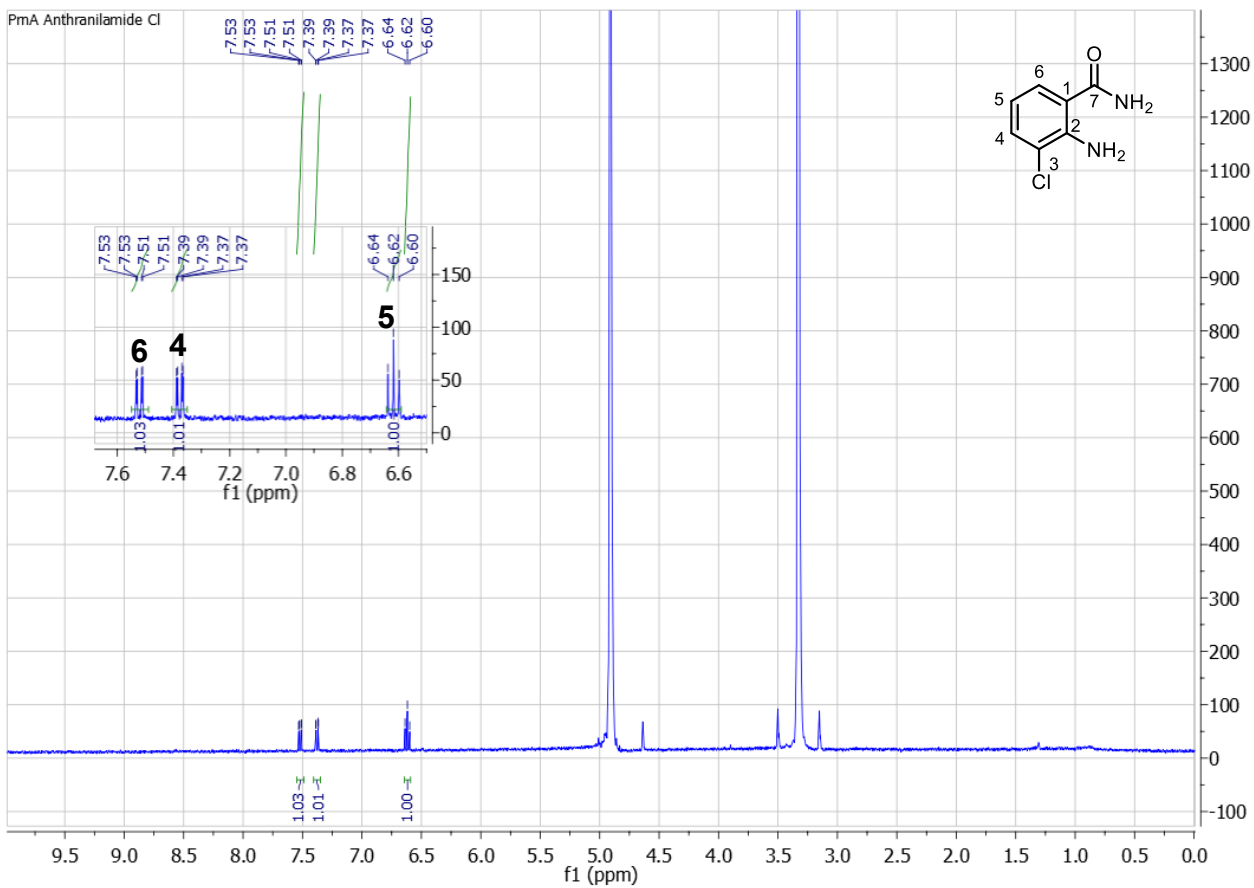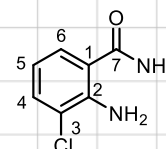

PmA\_5Anth\_Cl #399 RT: 3.11 AV: 1 NL: 1.97E8  
T: FTMS + p ESI Full ms [80.00-500.00]

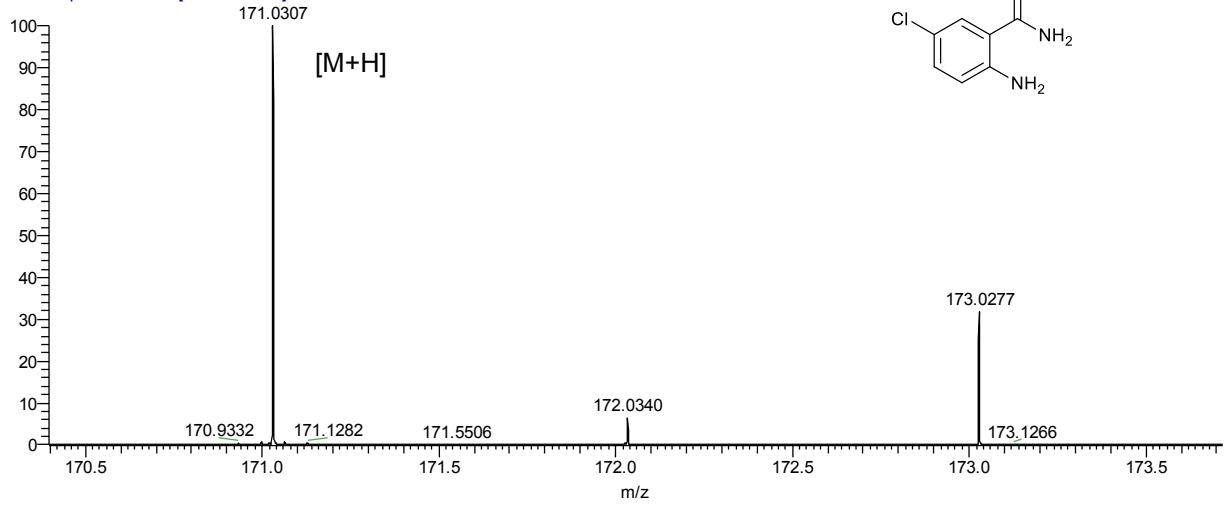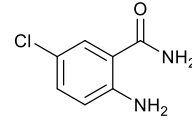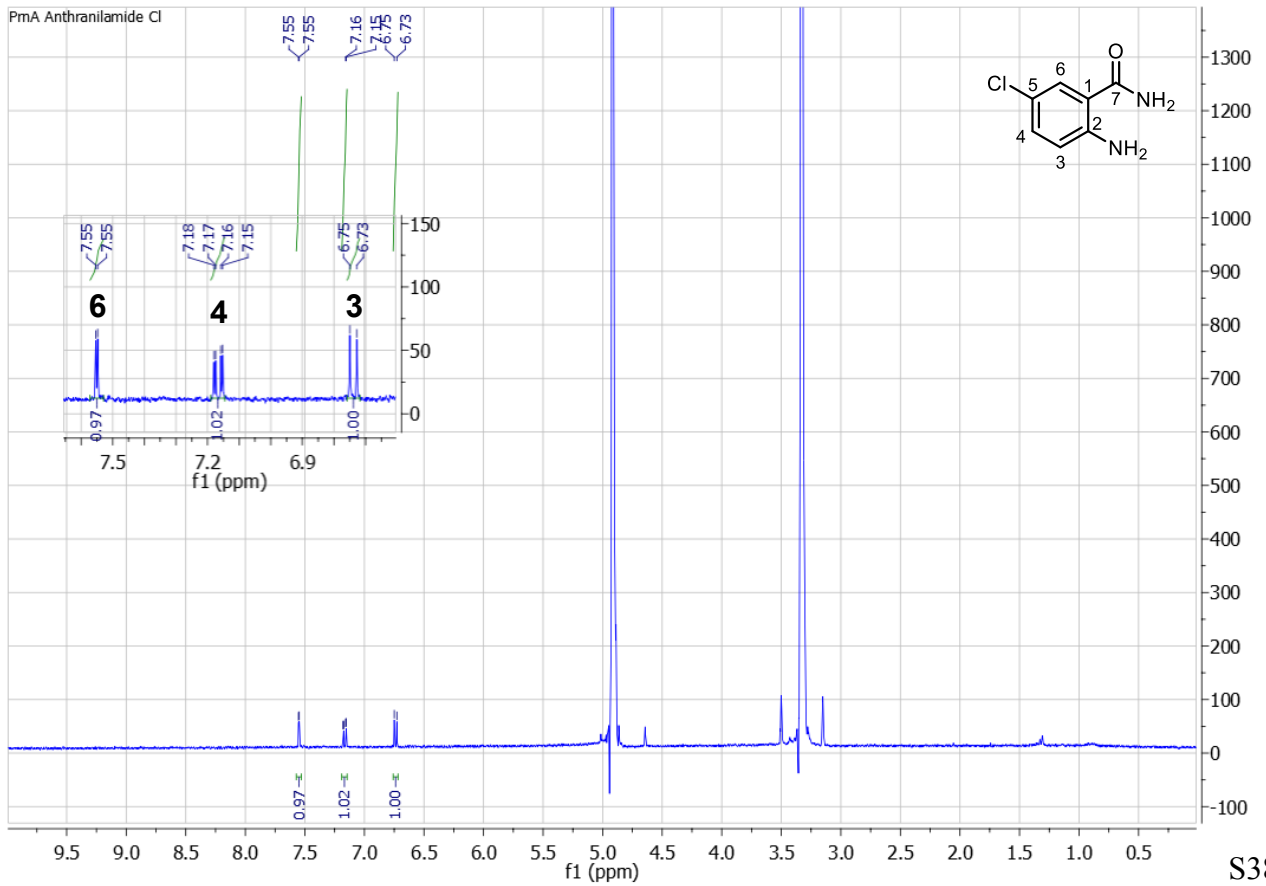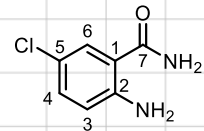

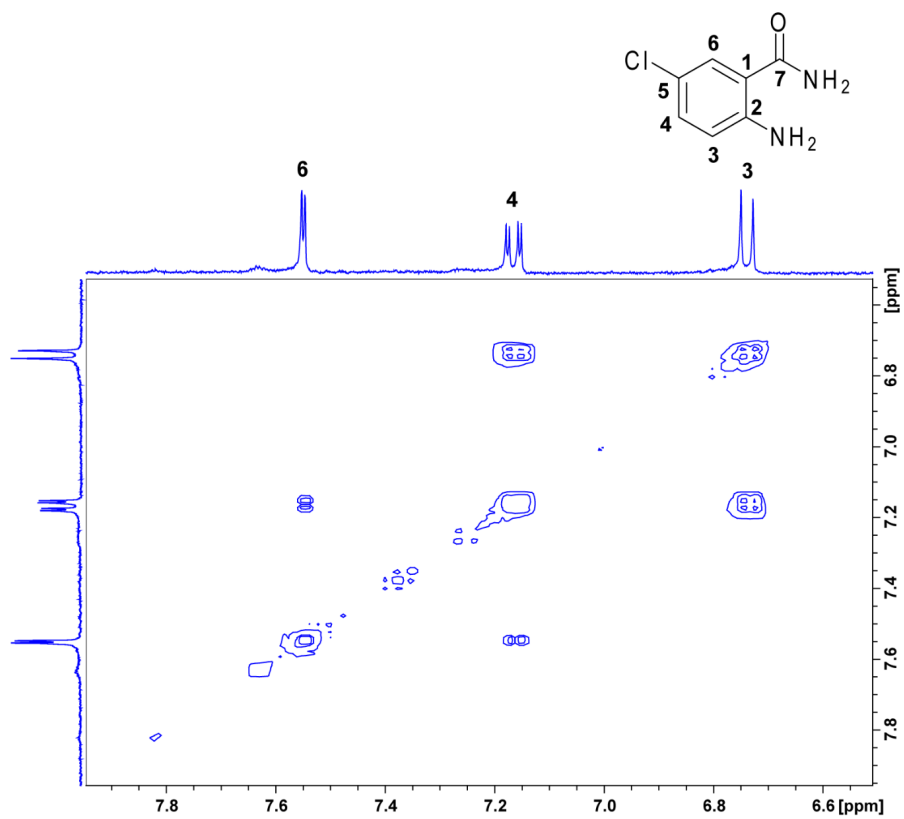

COSY of 5-chloroanthranilamide

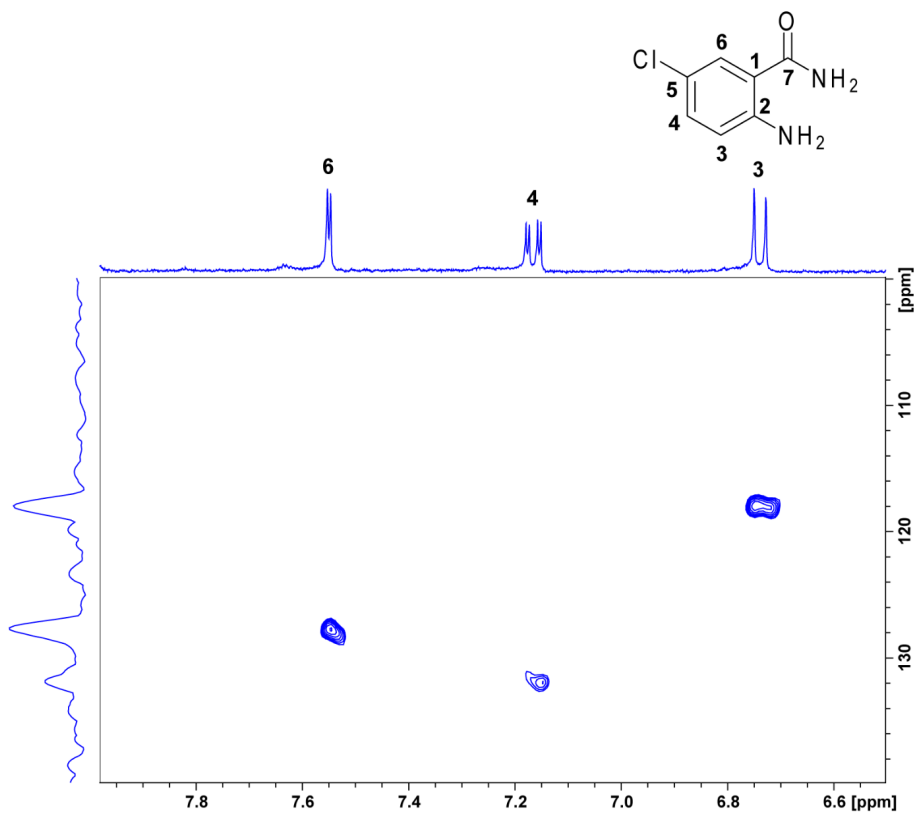

HMBC of 5-chloroanthranilamide

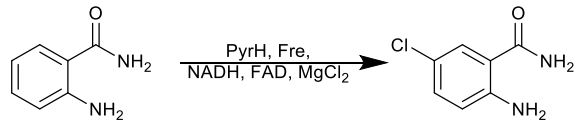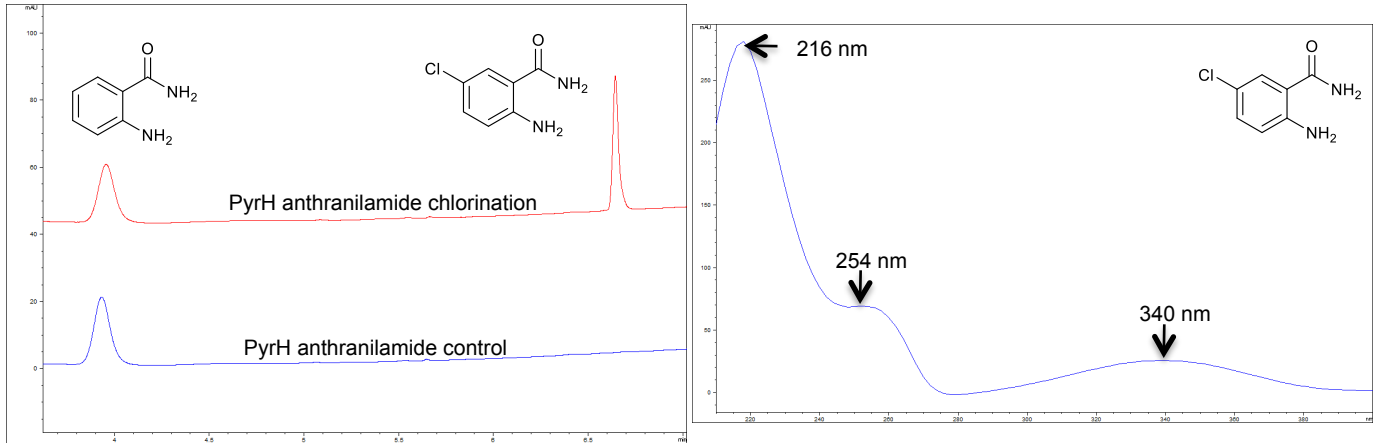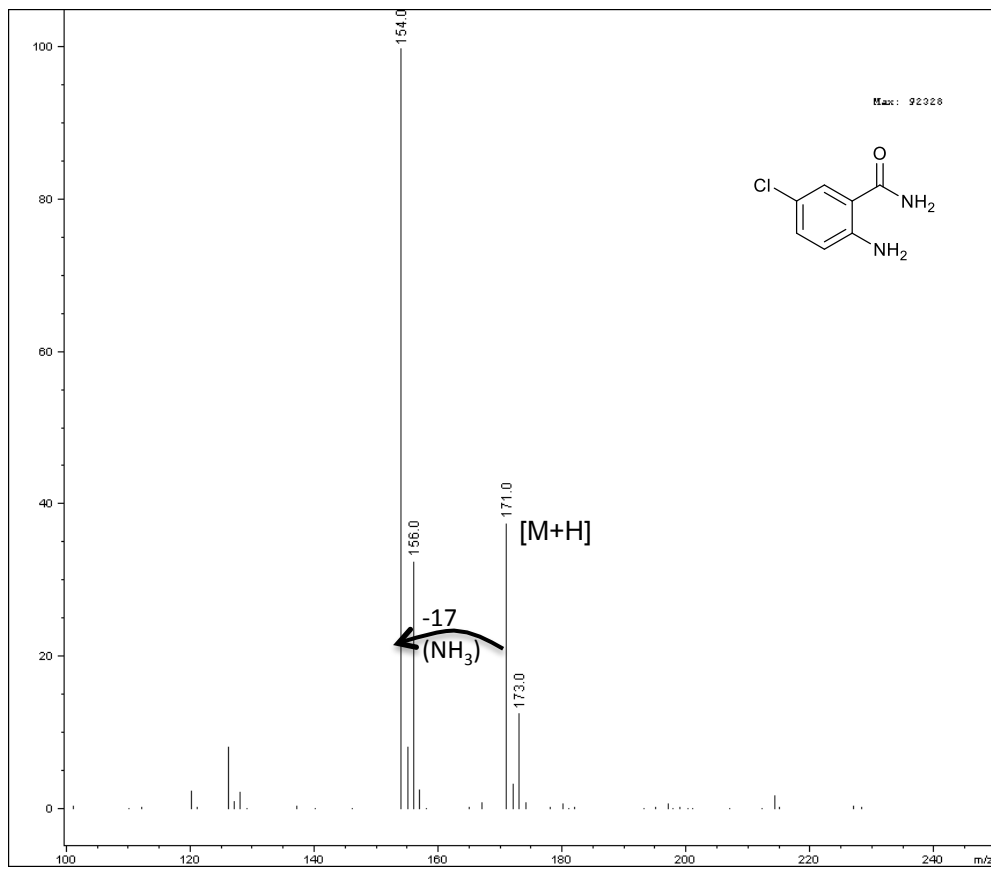



PyrH\_5Anth\_Cl #398 RT: 3.10 AV: 1 NL: 4.04E6  
T: FTMS + p ESI Full ms [80.00-500.00]

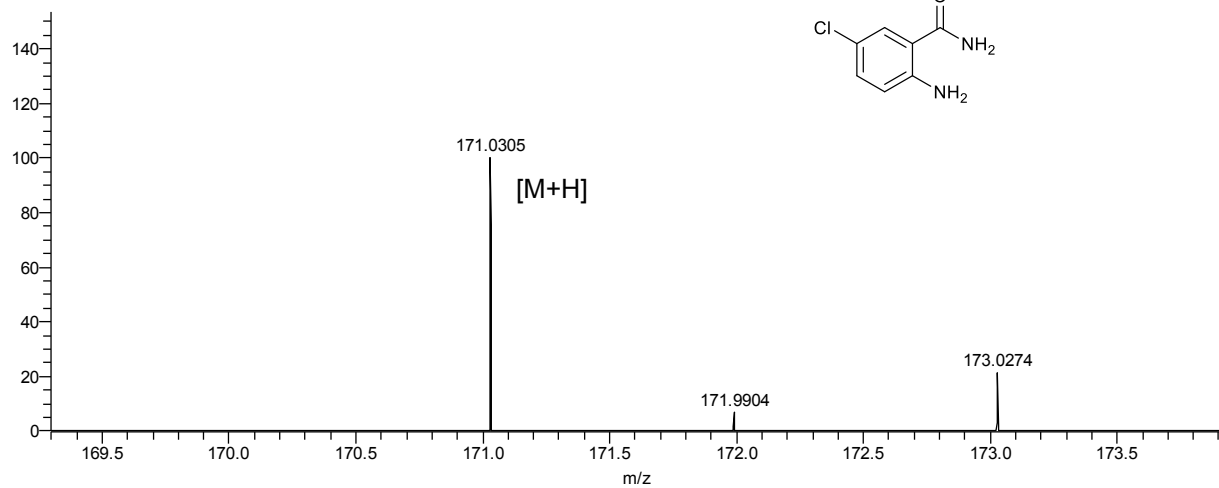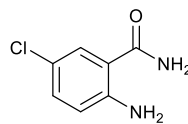

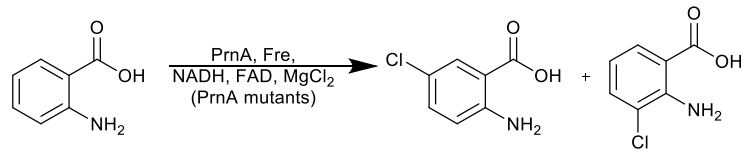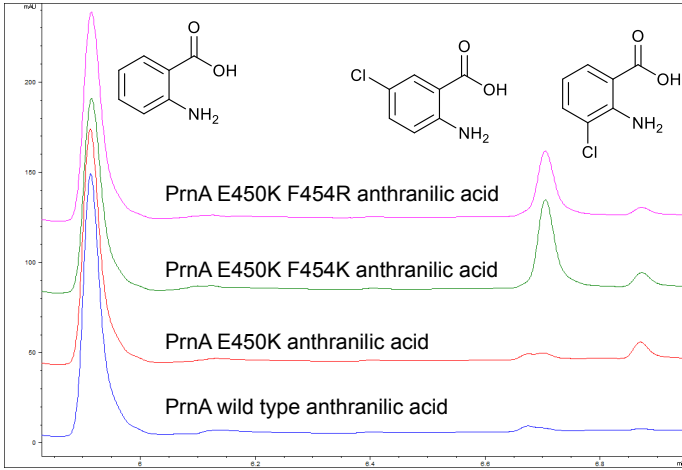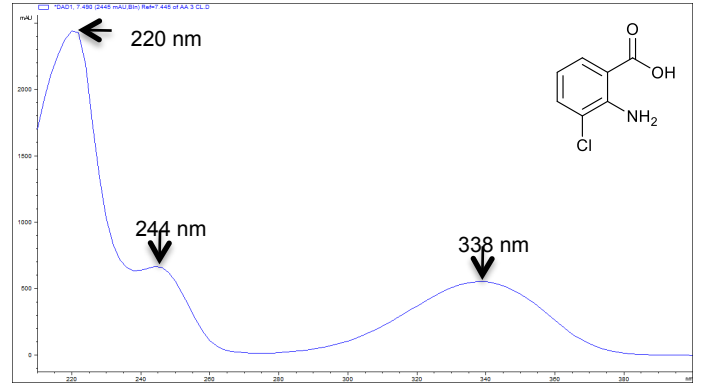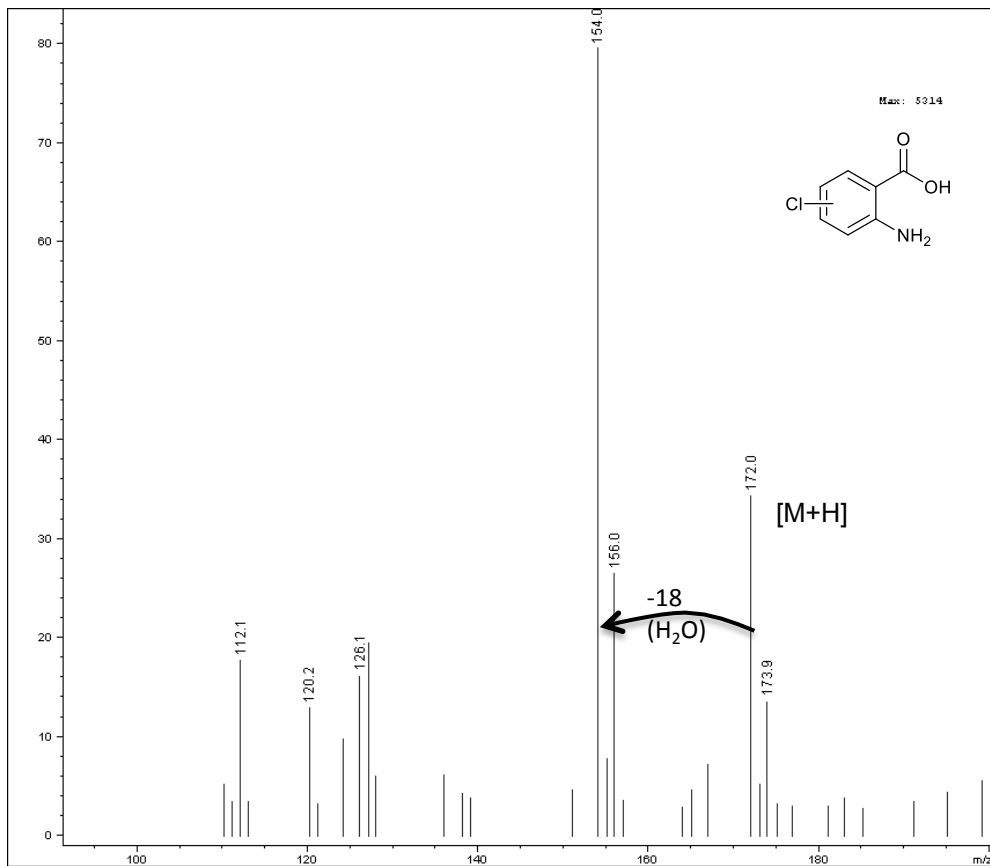

PmA\_3AA\_Cl #527 RT: 4.11 AV: 1 NL: 5.81E8  
T: FTMS + p ESI Full ms [80.00-500.00]

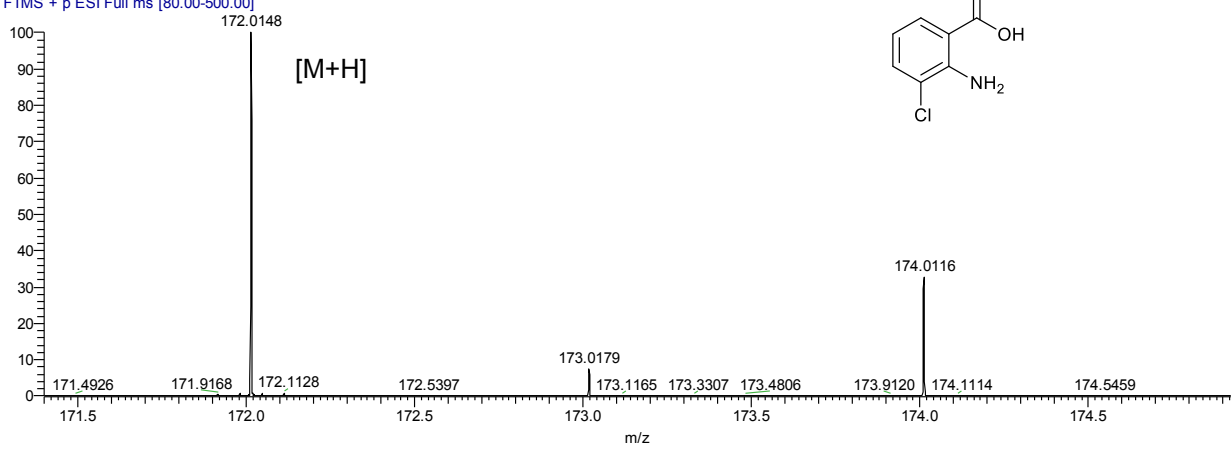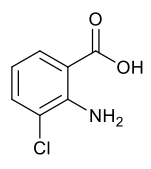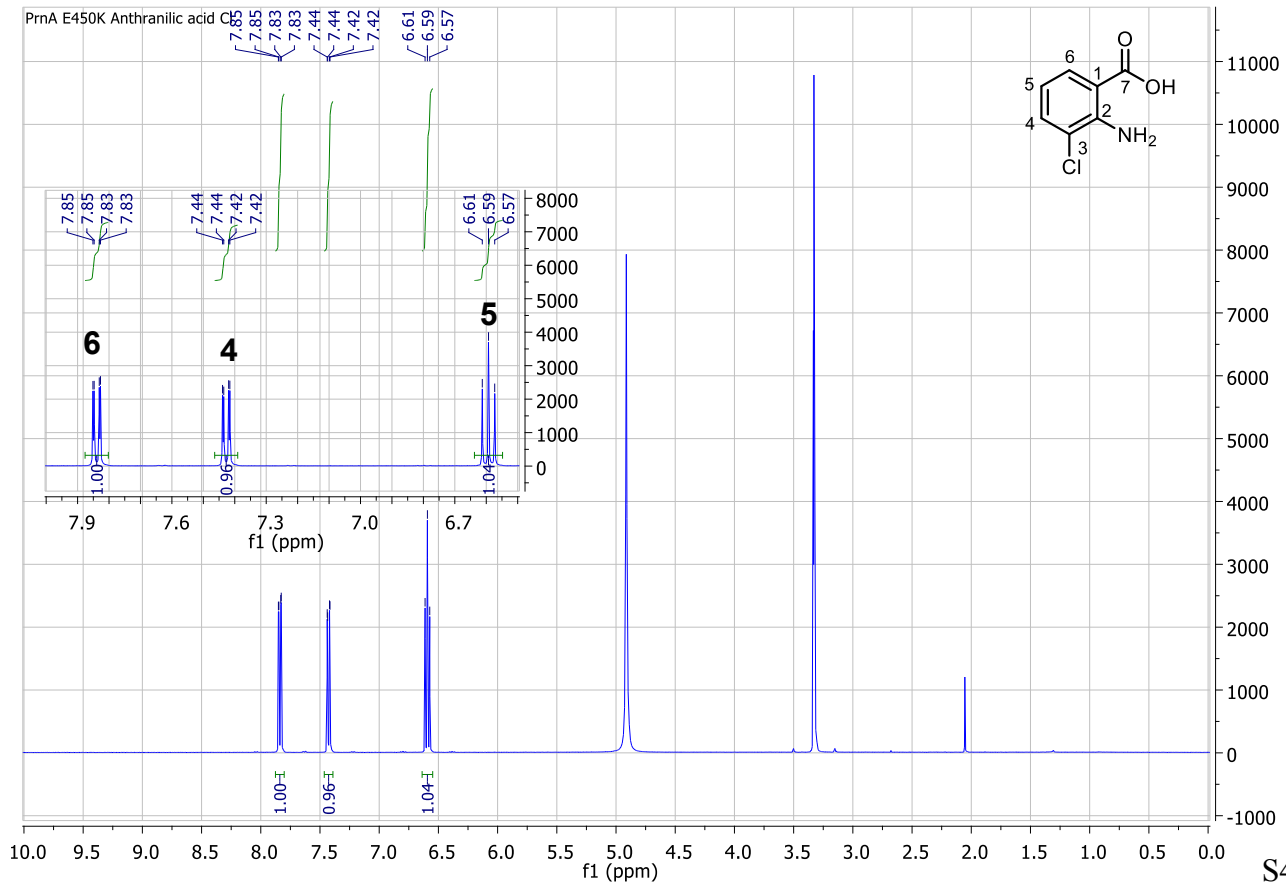

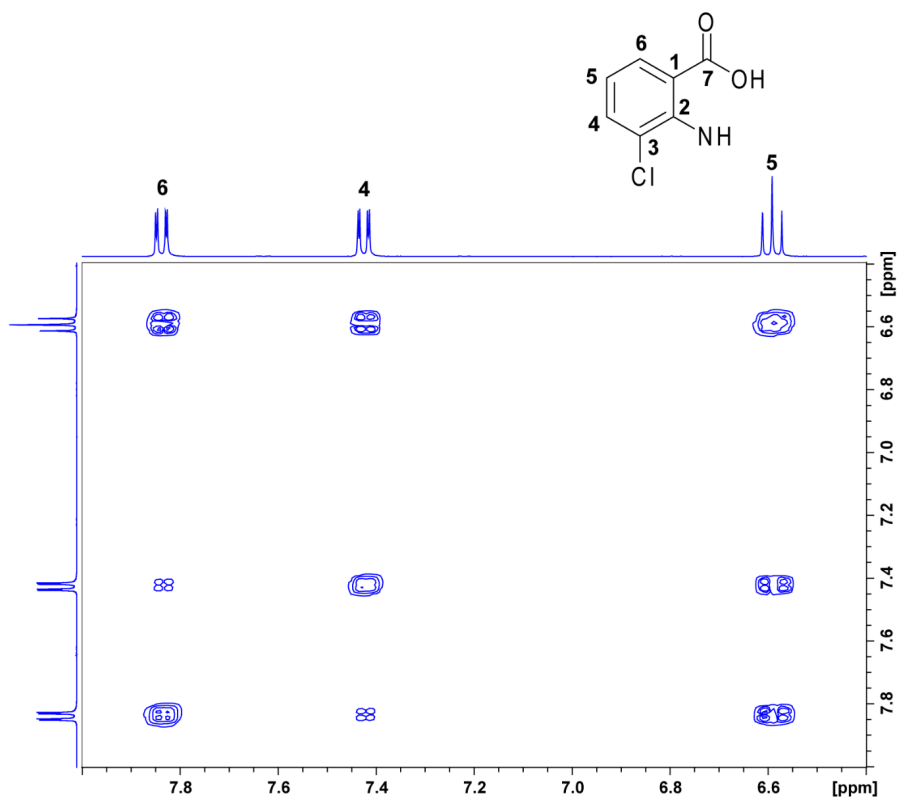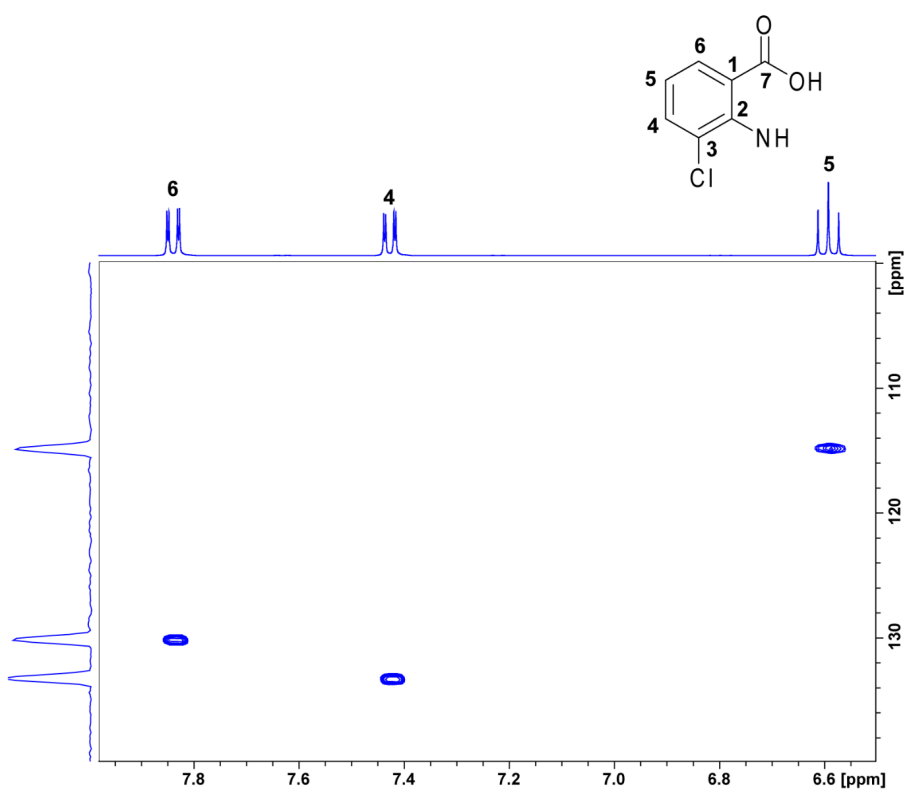

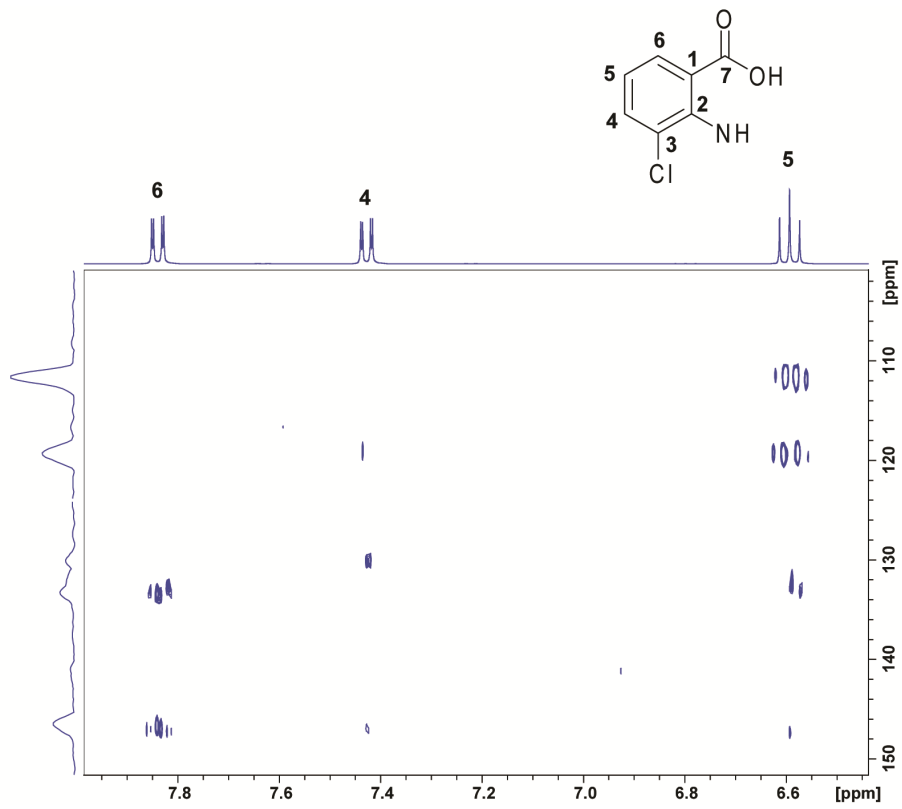

*HMBC of 3-chloroanthranilic acid*

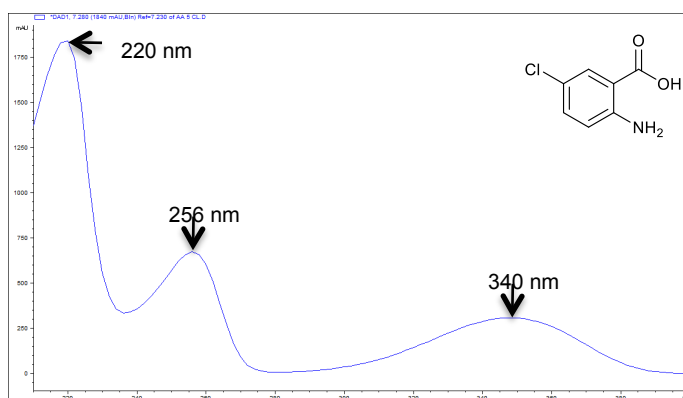

PmA\_5AA\_Cl #527 RT: 4.11 AV: 1 NL: 1.02E9  
T: FTMS + p ESI Full ms [80.00-500.00]

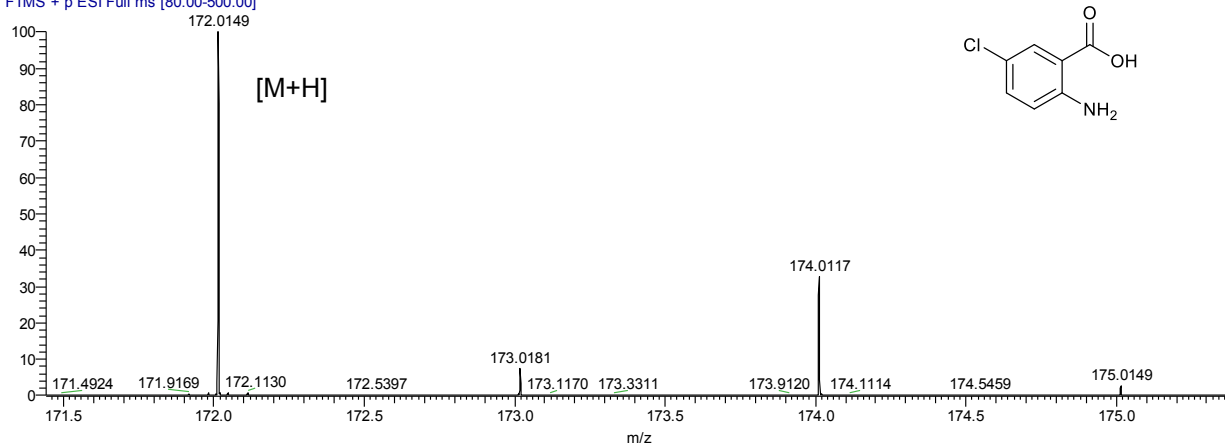

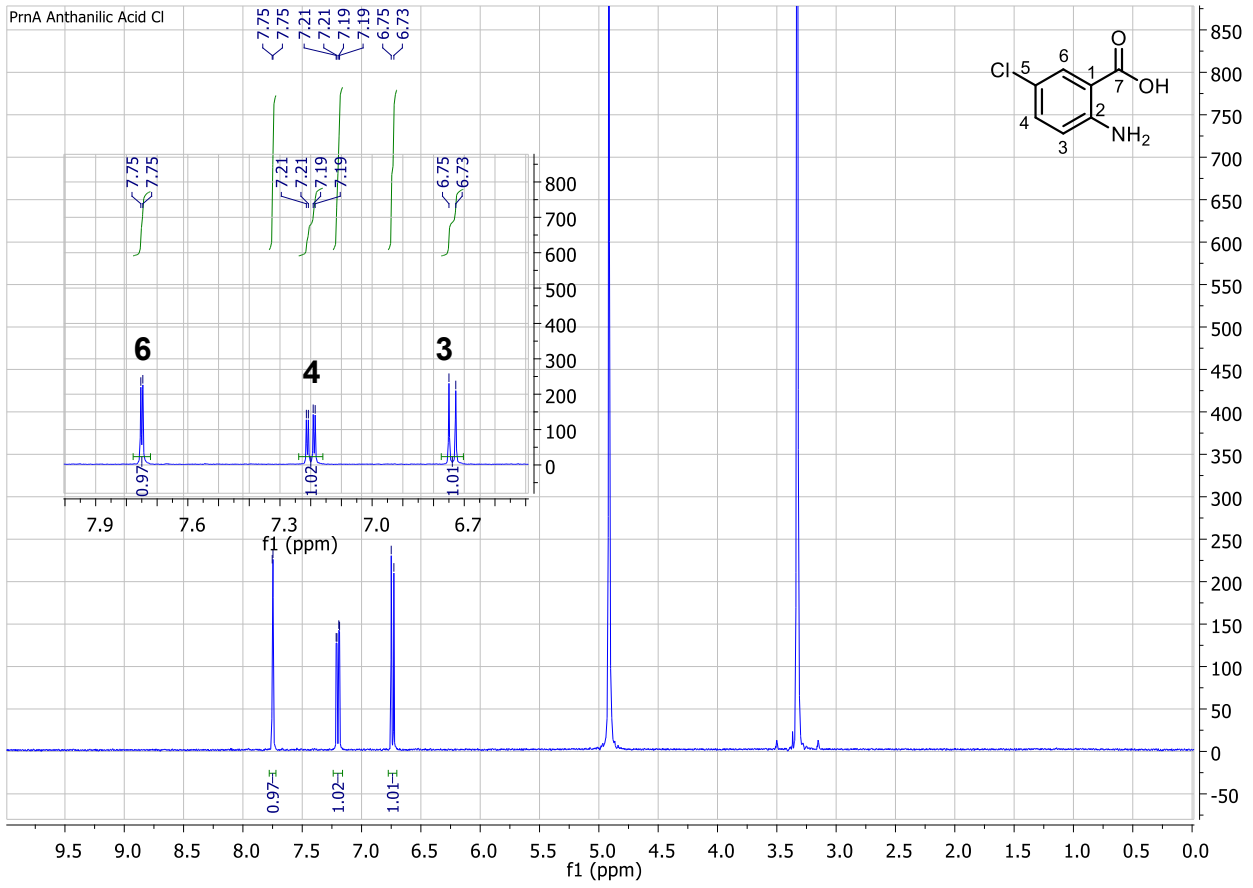

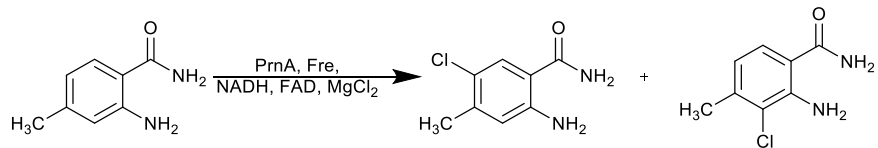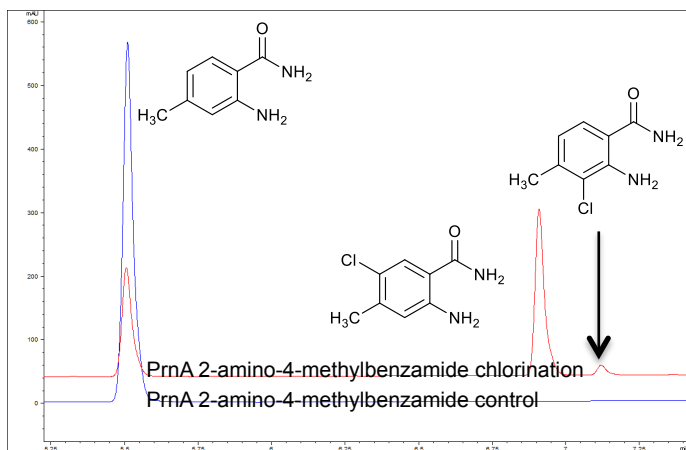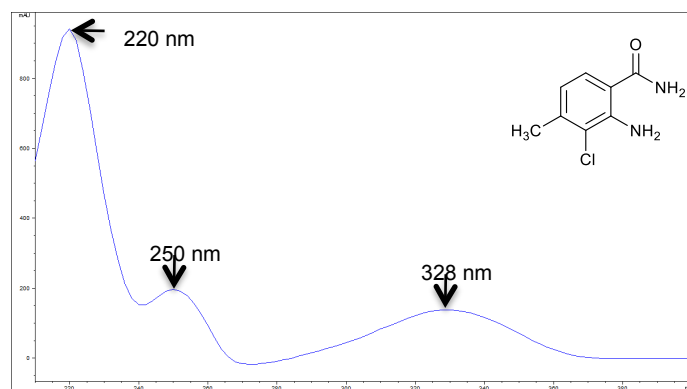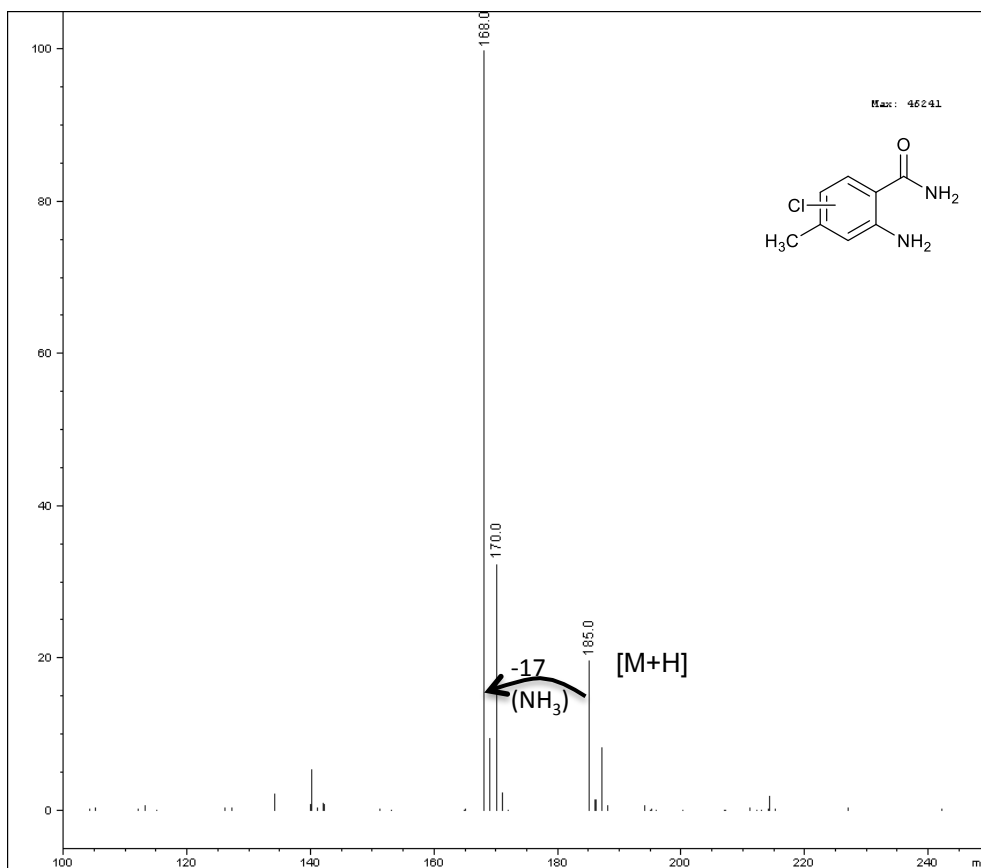



PmA\_3\_2A4MB\_Cl #474 RT: 3.69 AV: 1 NL: 4.13E8  
T: FTMS + p ESI Full ms [80.00-500.00]

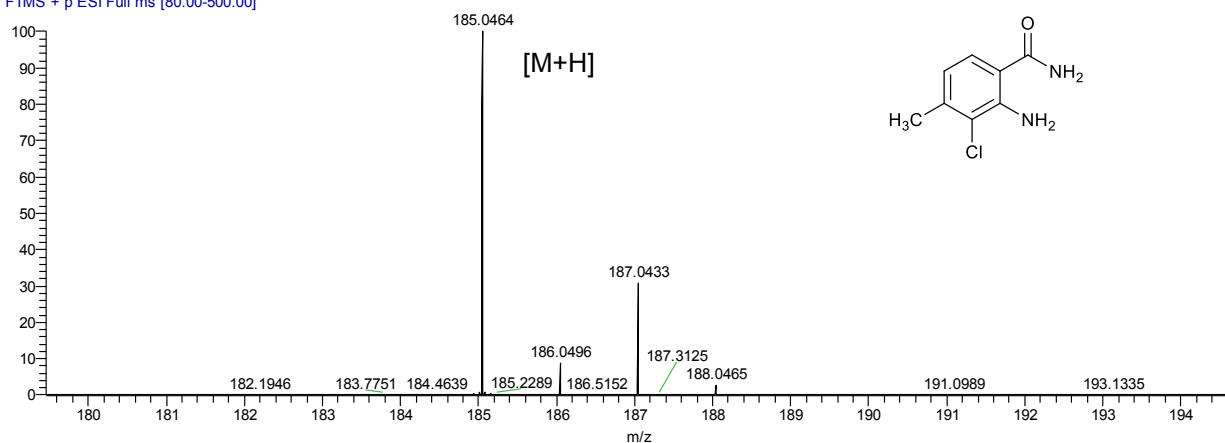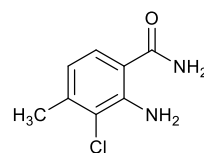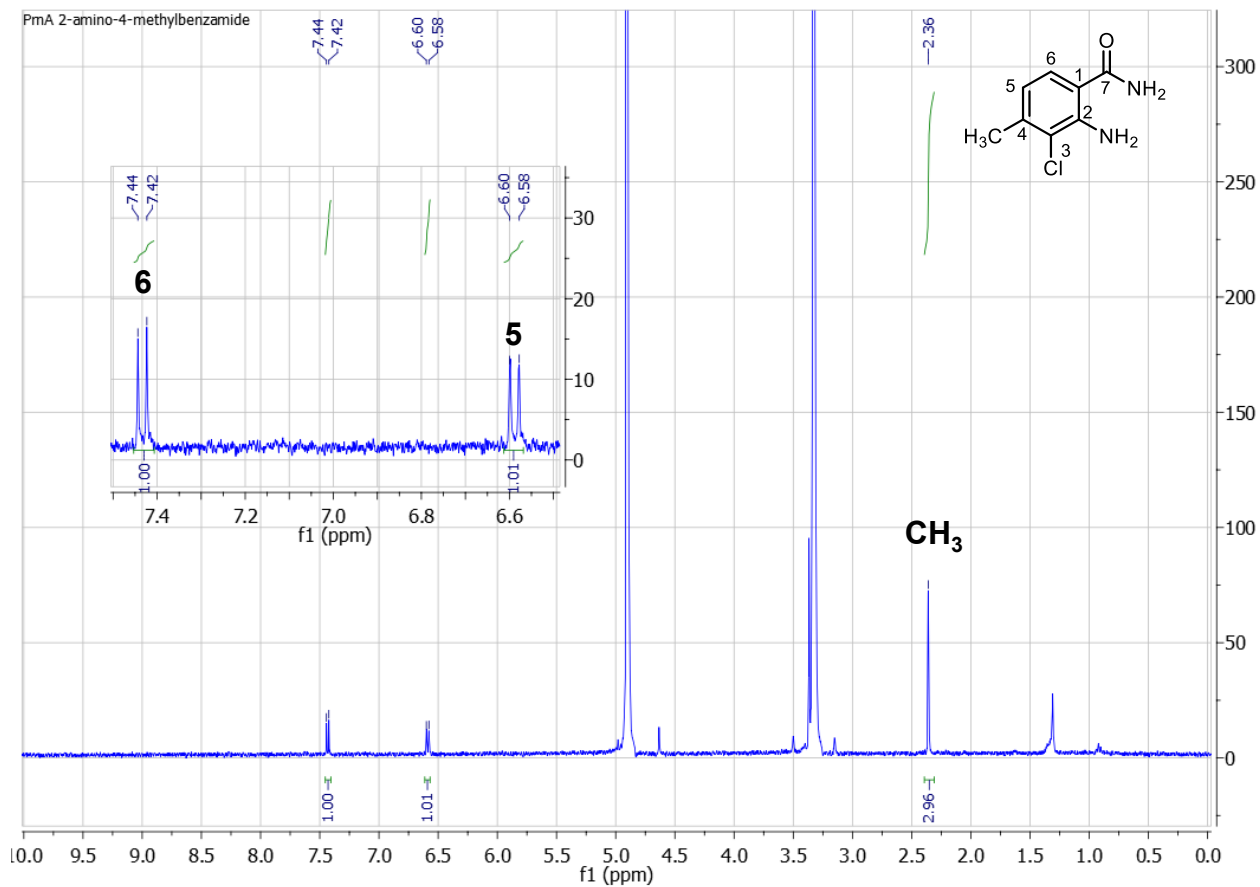

PmA\_5\_2A4MB\_Cl #476 RT: 3.71 AV: 1 NL: 3.42E8  
T: FTMS + p ESI Full ms [80.00-500.00]

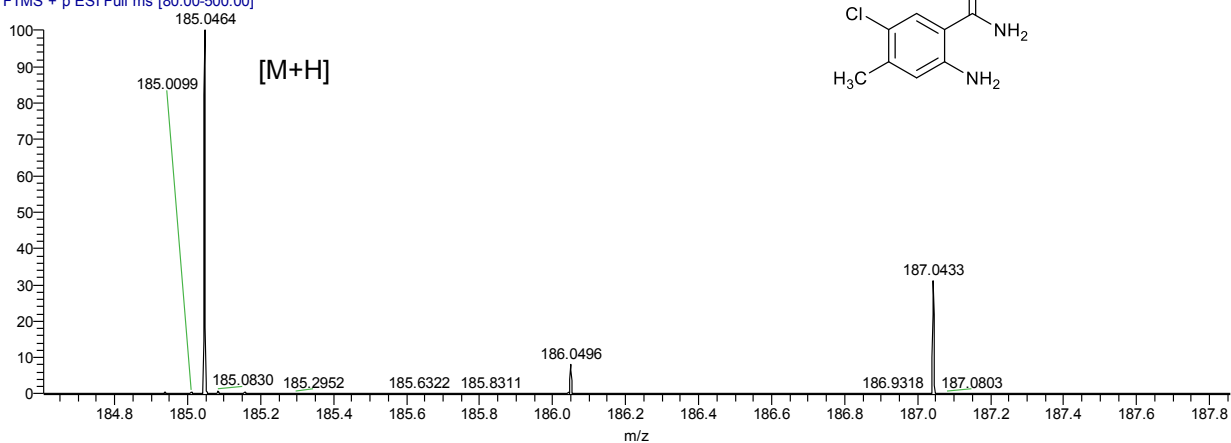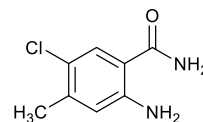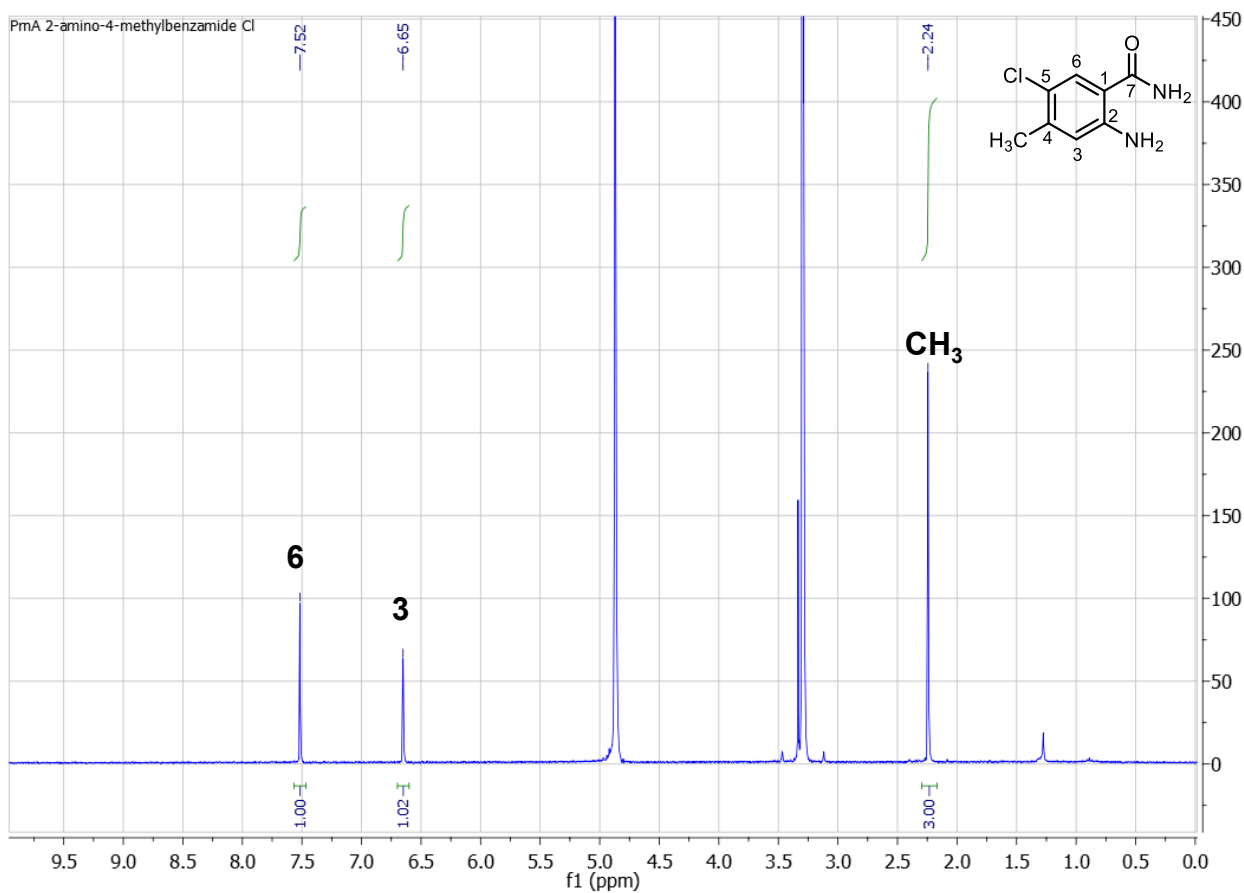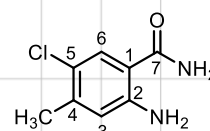

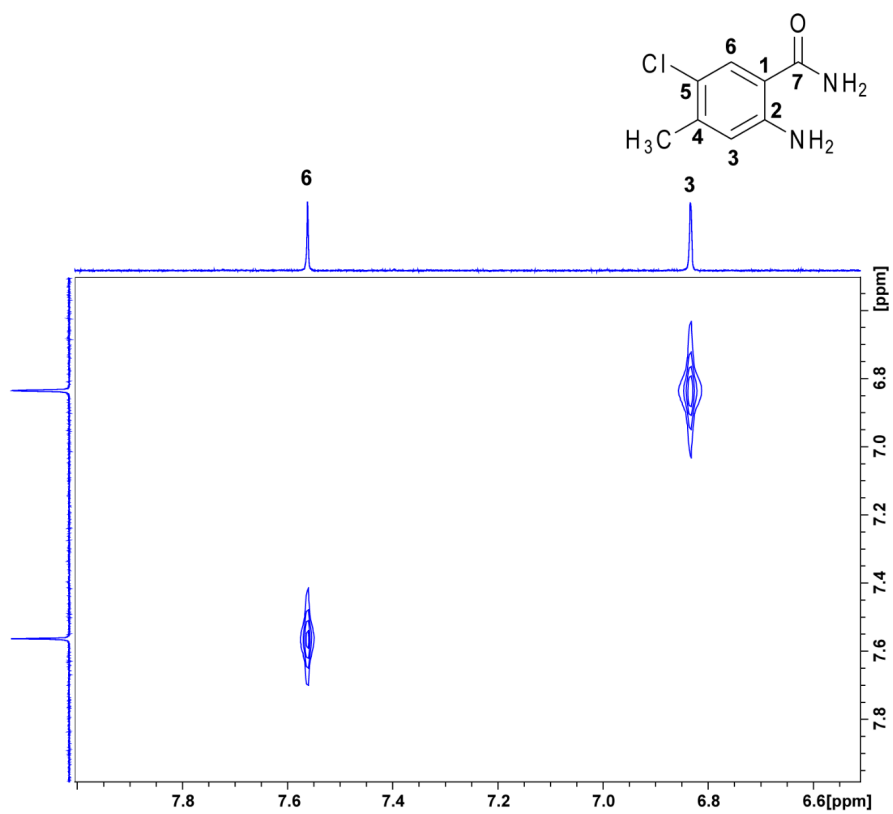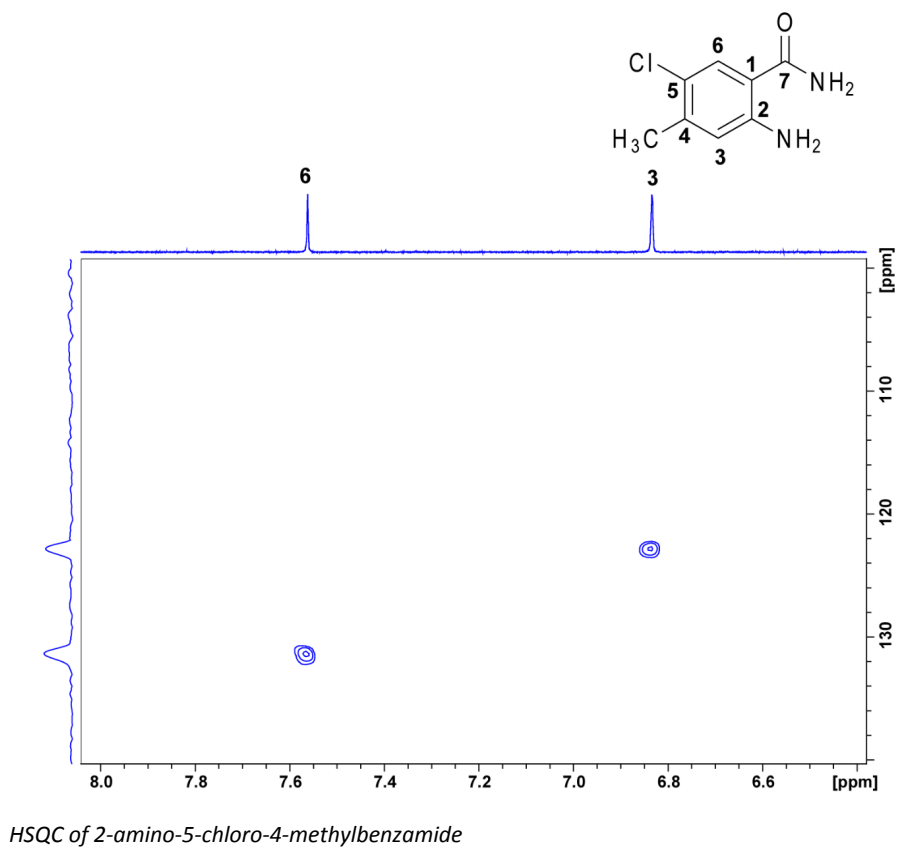

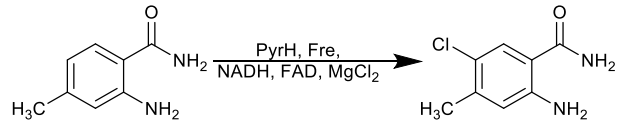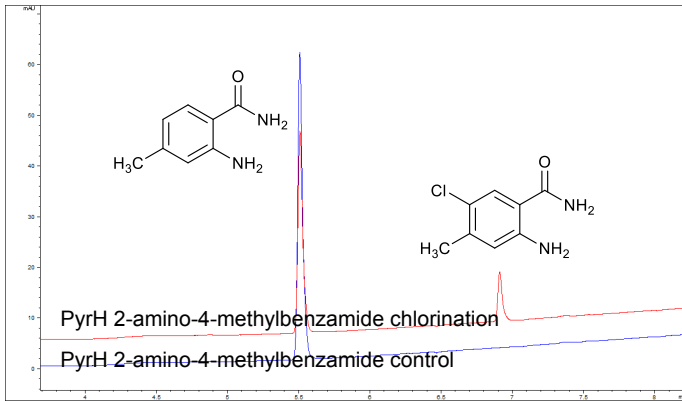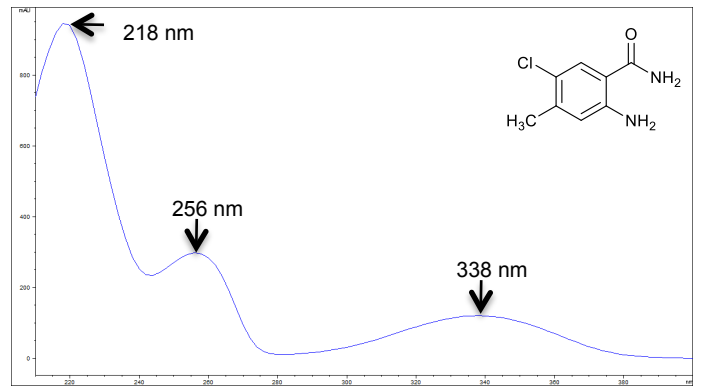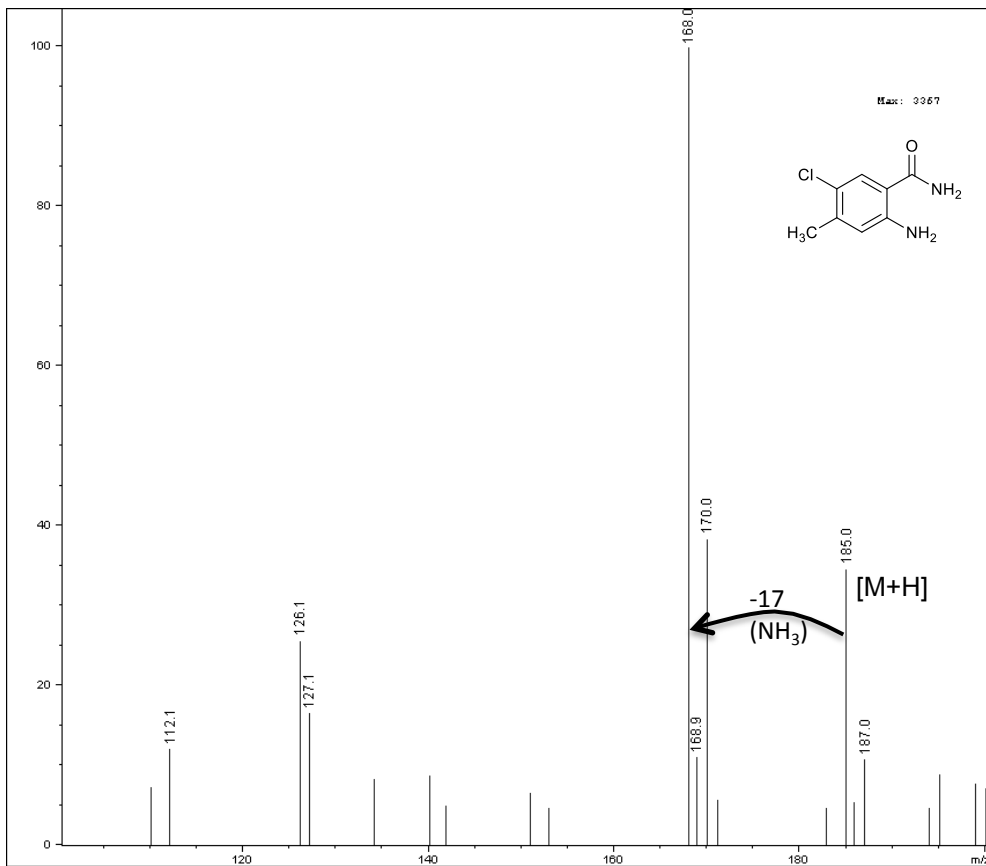

PyrH\_5\_2A4MB\_Cl #474 RT: 3.69 AV: 1 NL: 7.28E7  
T: FTMS + p ESI Full ms [80.00-500.00]

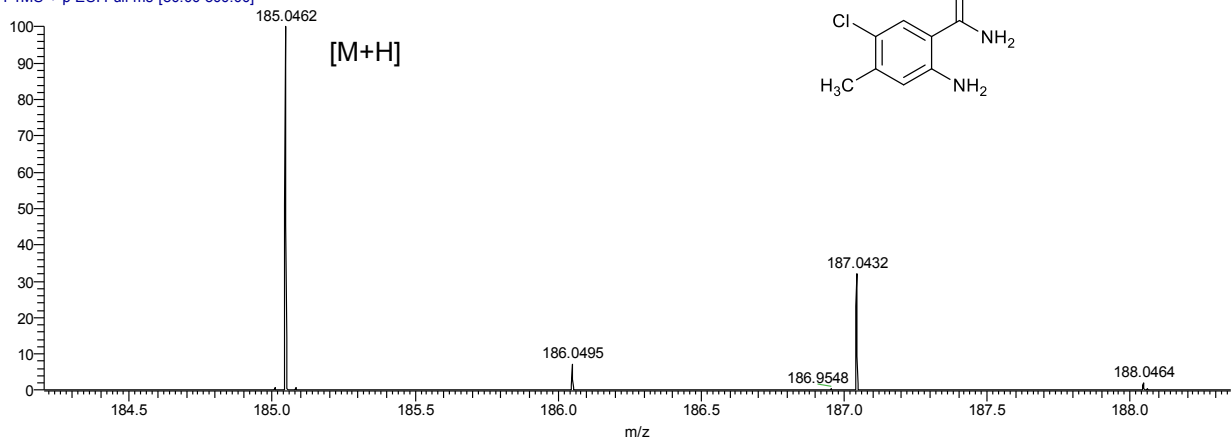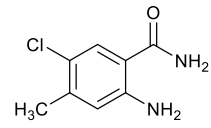

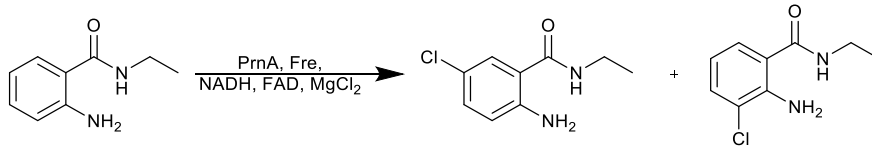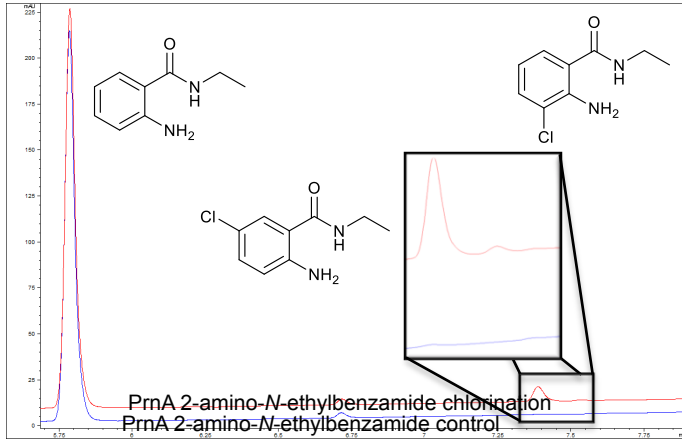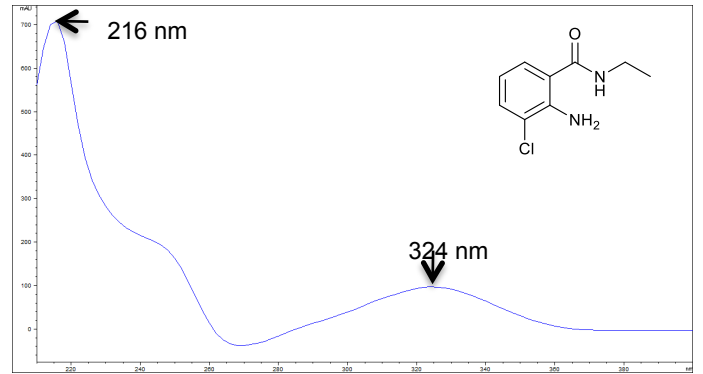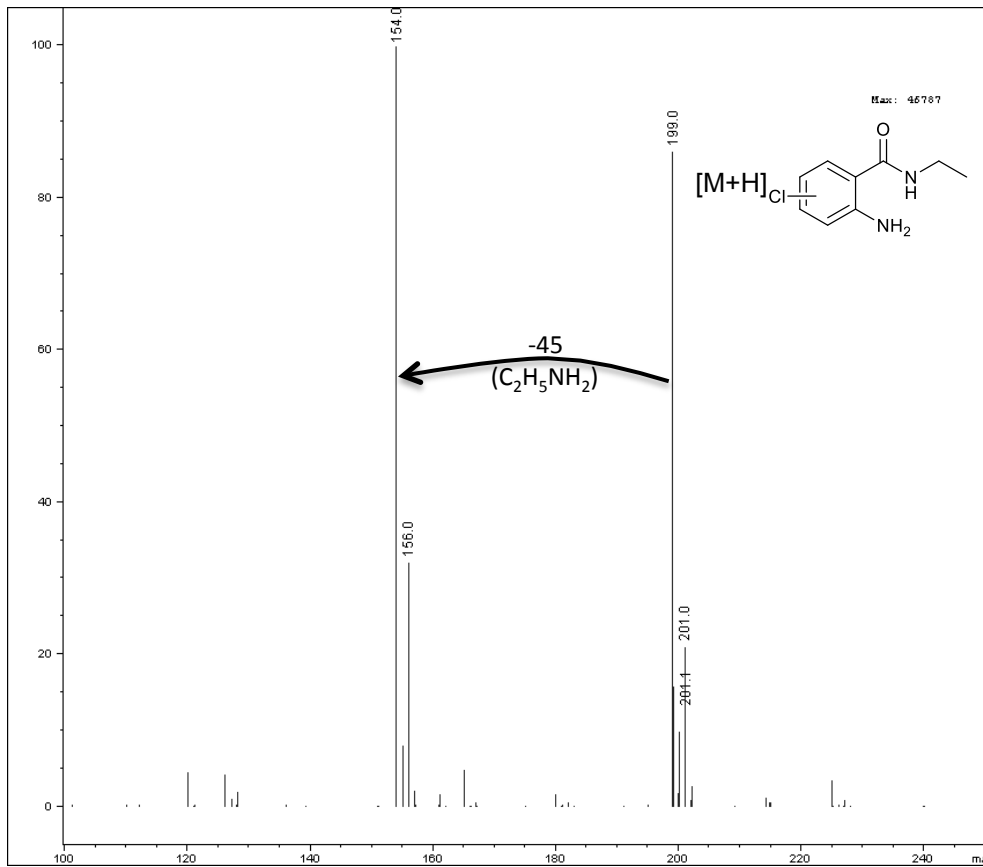

PmA\_2ANEB\_Cl #529 RT: 4.12 AV: 1 NL: 7.21E8  
T: FTMS + p ESI Full ms [80.00-500.00]

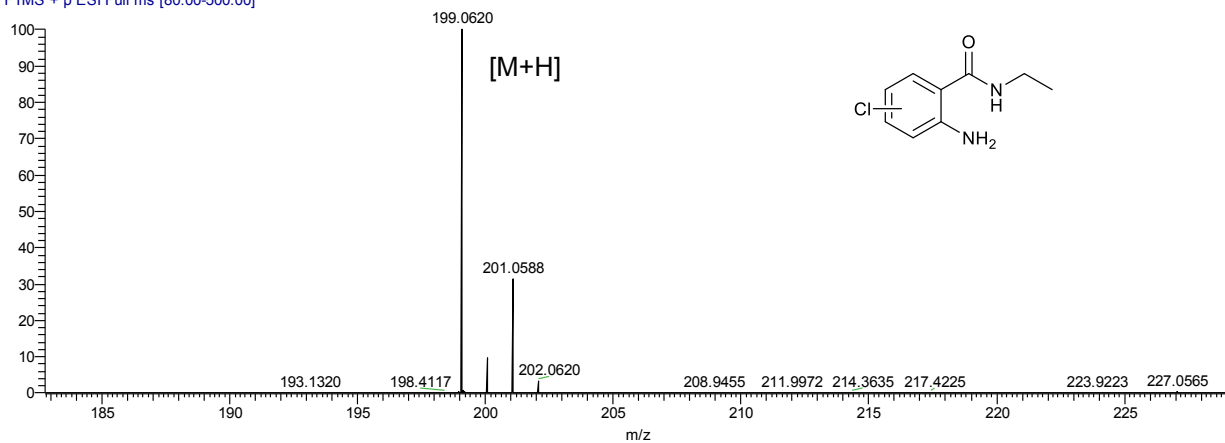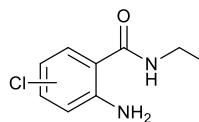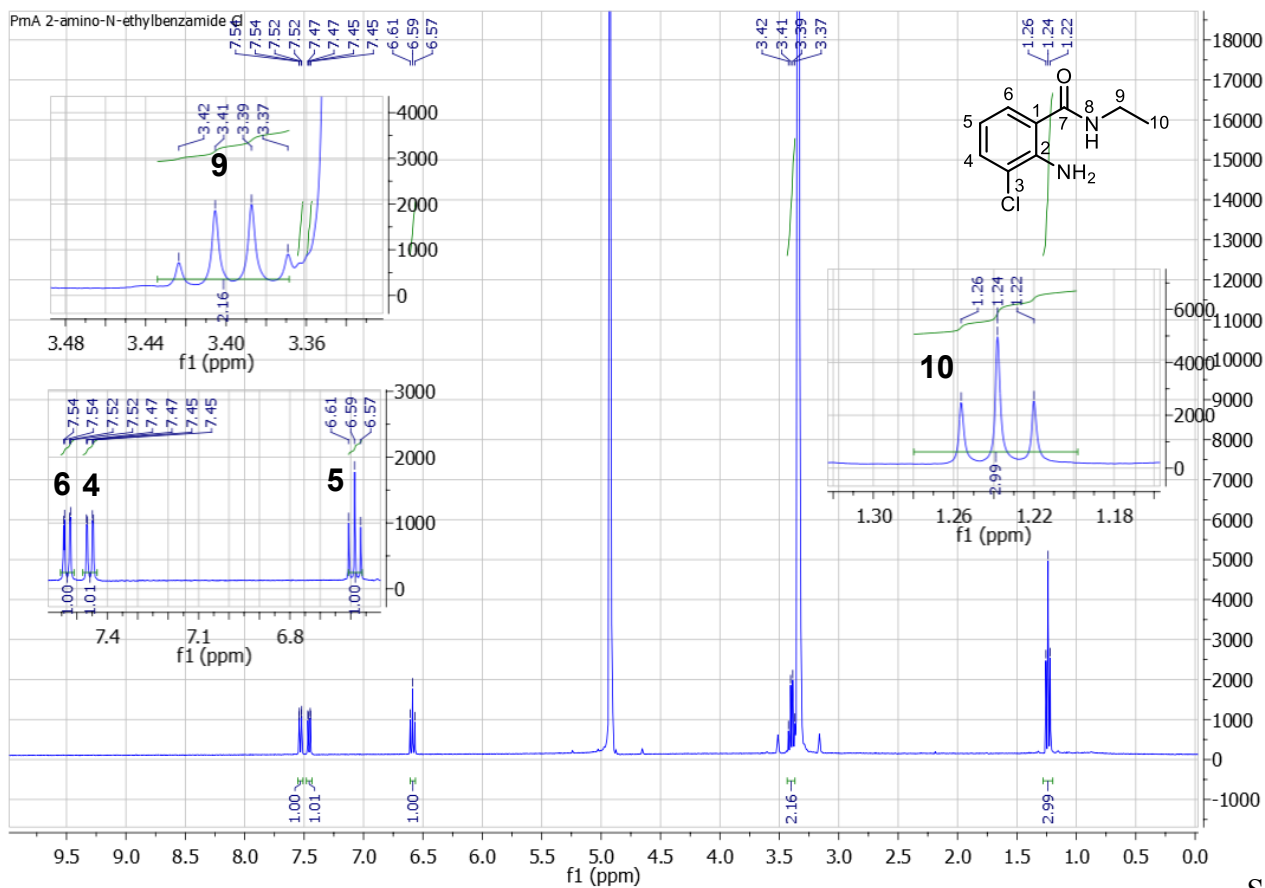

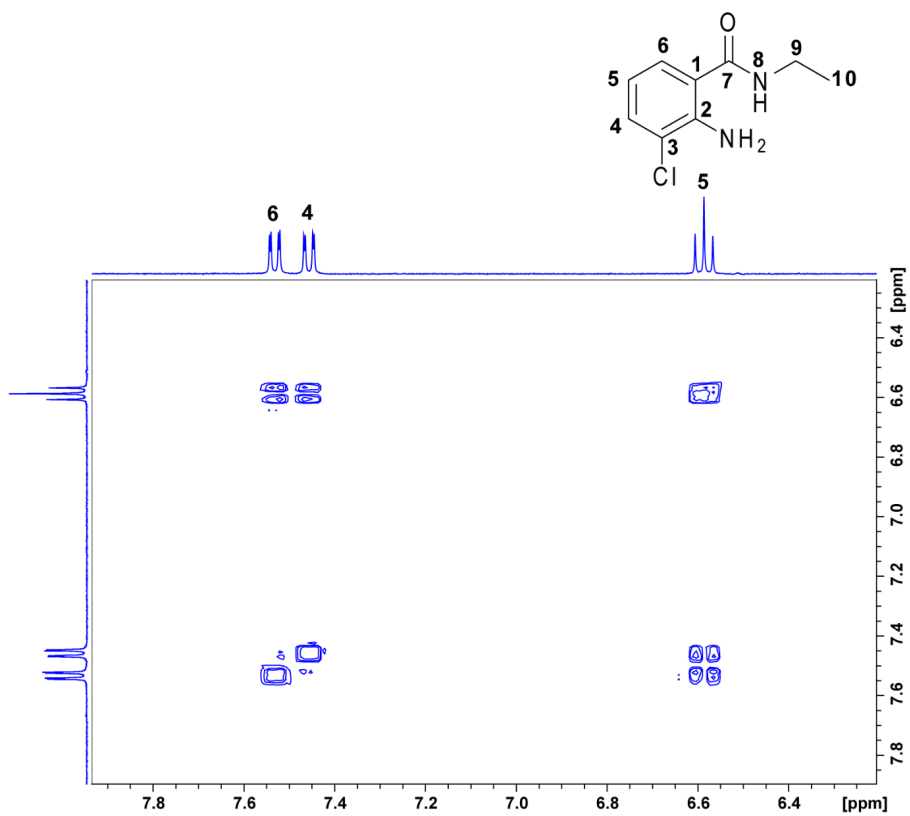

COSY of 2-amino-3-chloro-N-ethylbenzamide



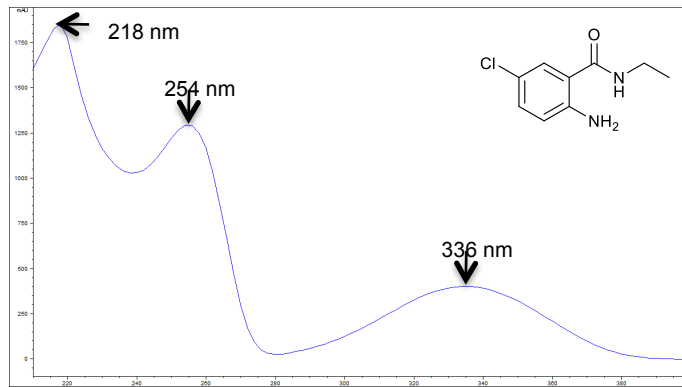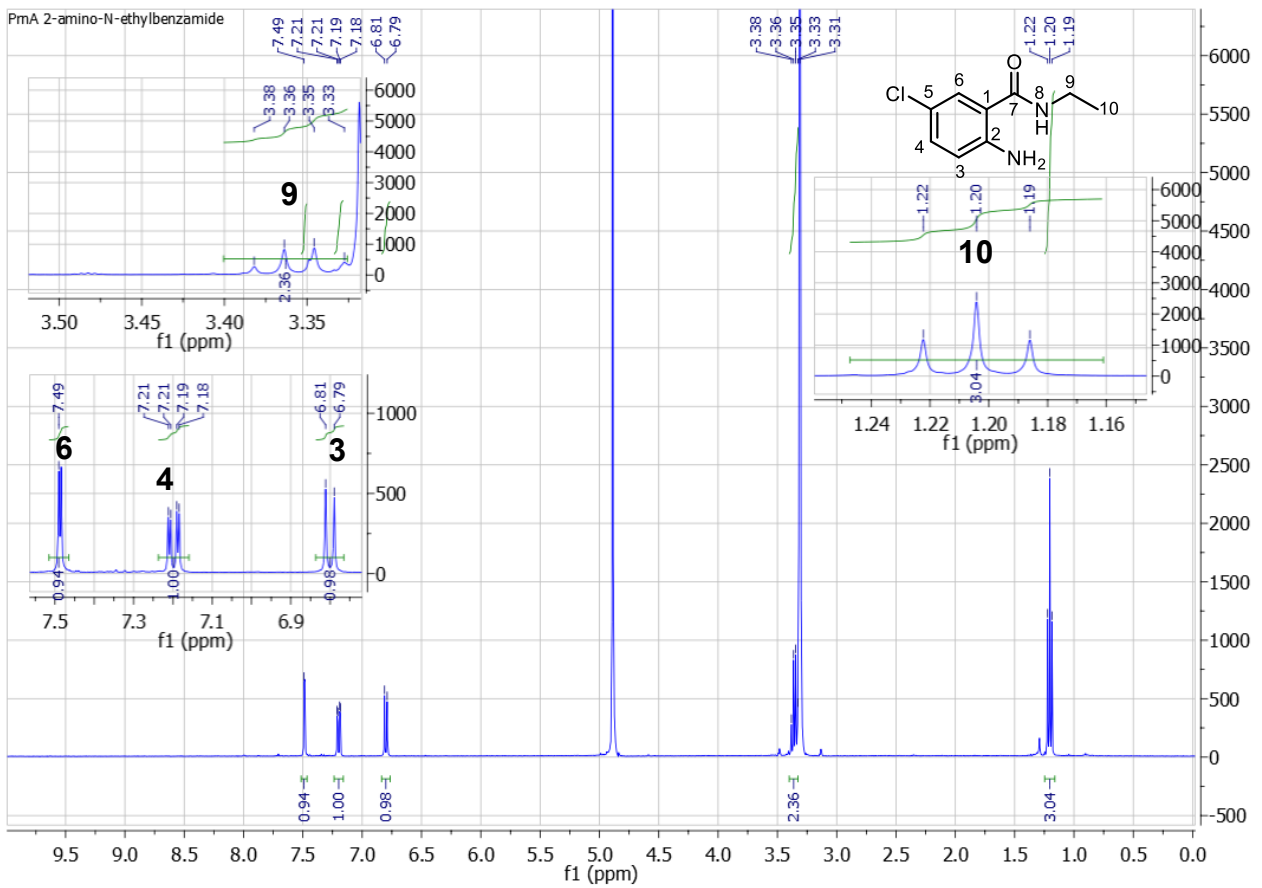

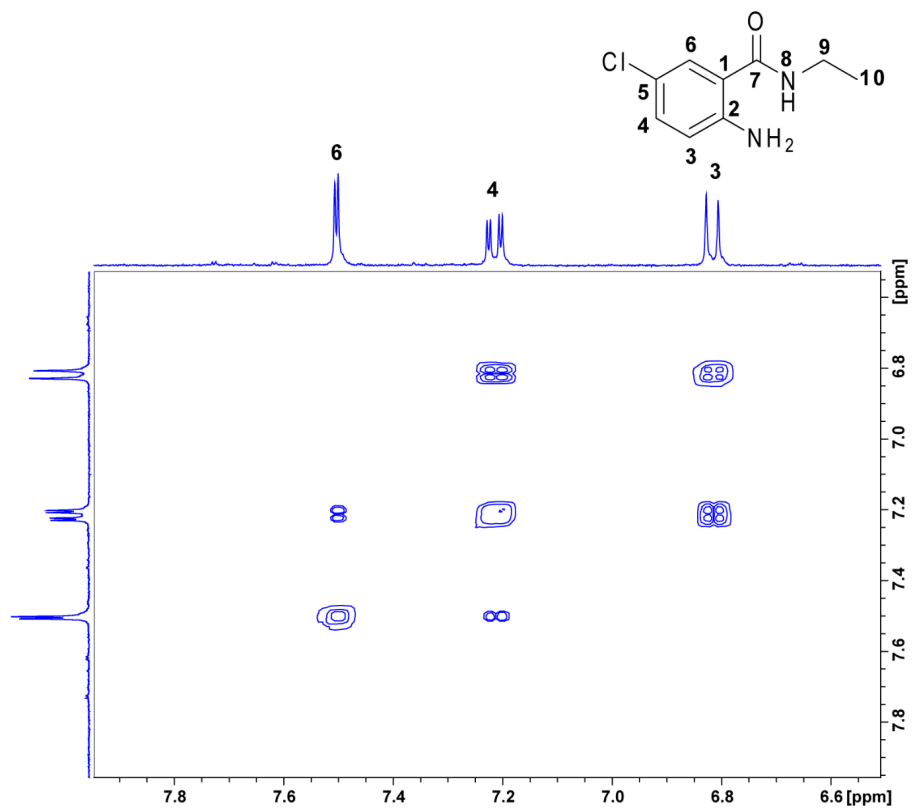

COSY of 2-amino-5-chloro-N-ethylbenzamide

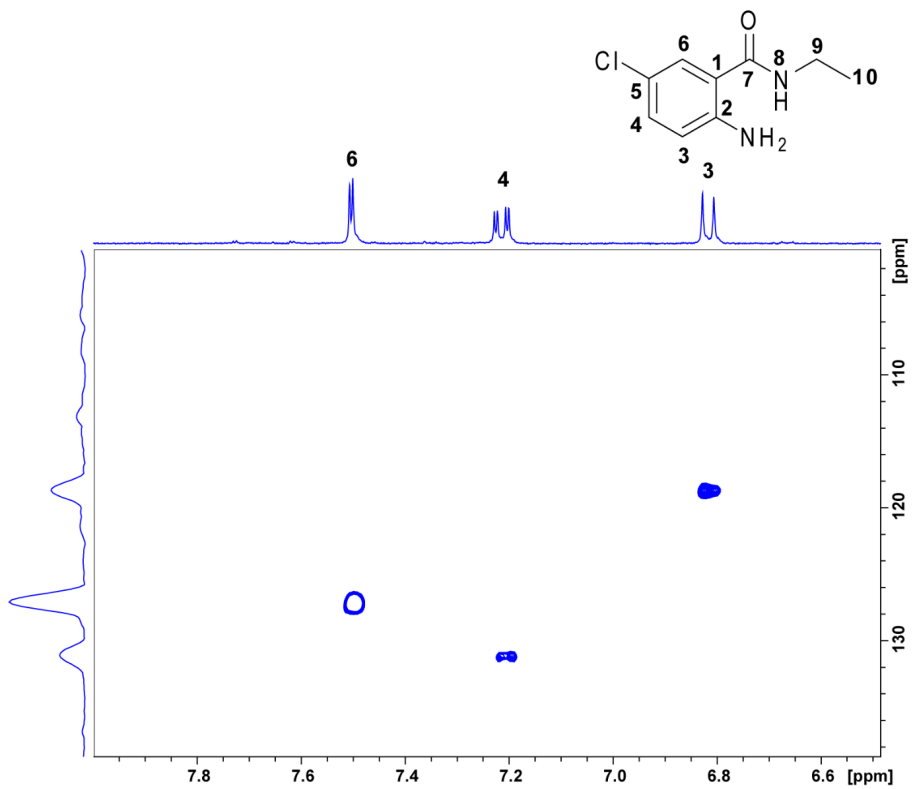

HMQC of 2-amino-5-chloro-N-ethylbenzamide

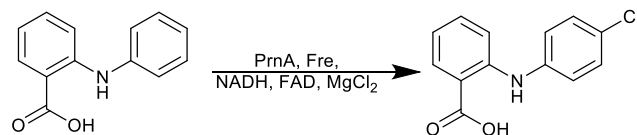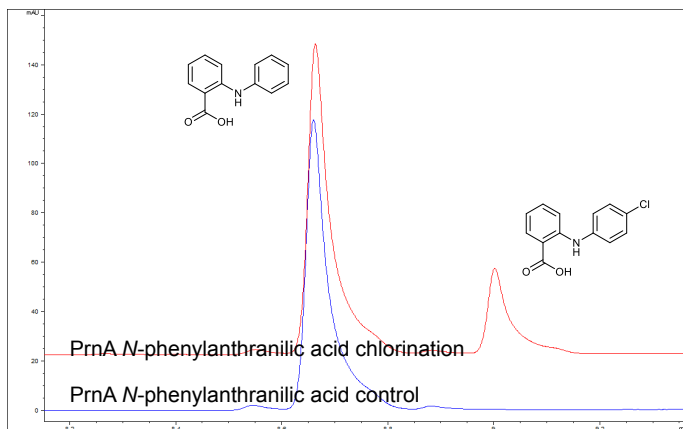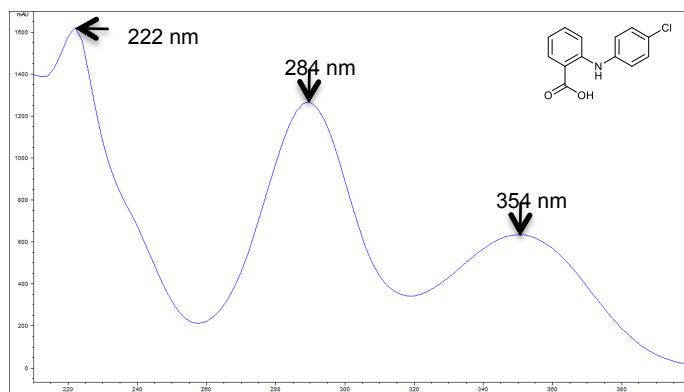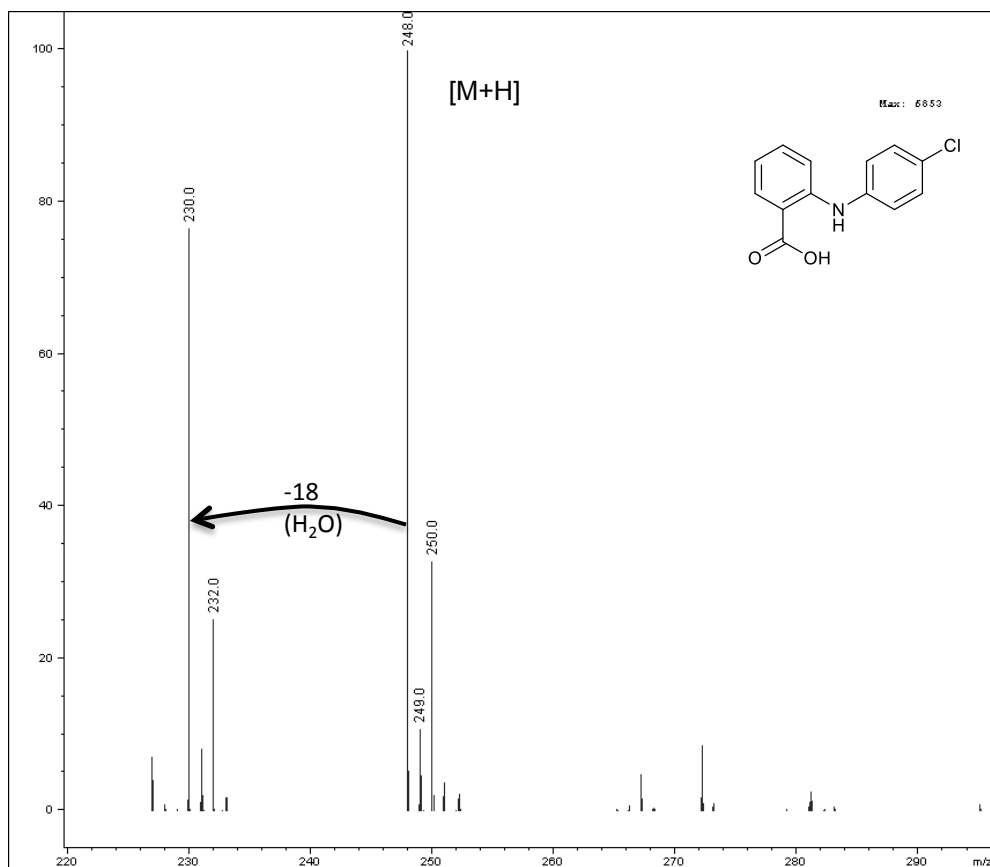

PmA NPAA

20141001\_RAS\_002 33 (0.549) AM (Cen, 4, 20.00, Ar, 5000.0, 554.26, 1.00); Sb (15, 10.00); Sm (SG, 3x5.00); Cm (30:33)

TOF MS ES-971

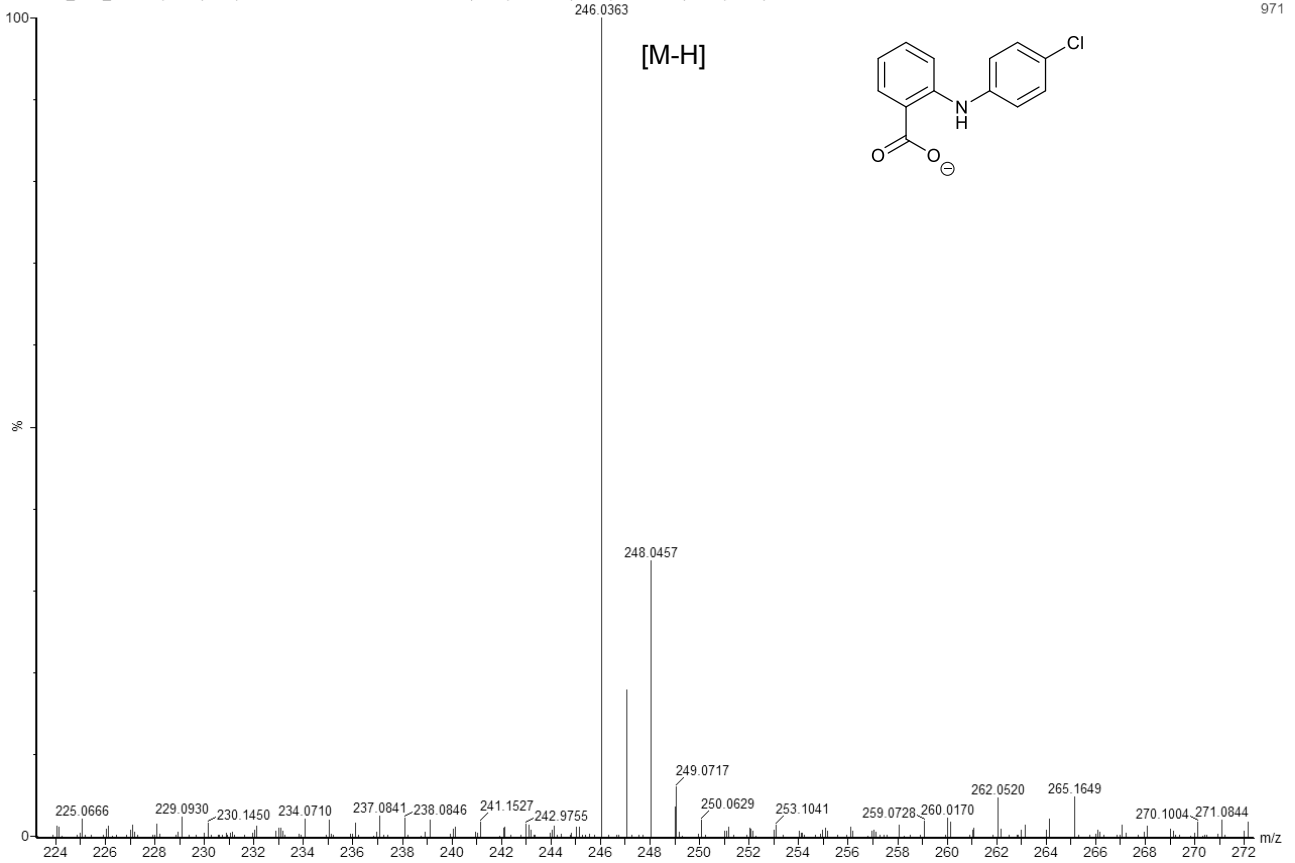

PmA N-Phenylanthranilic acid

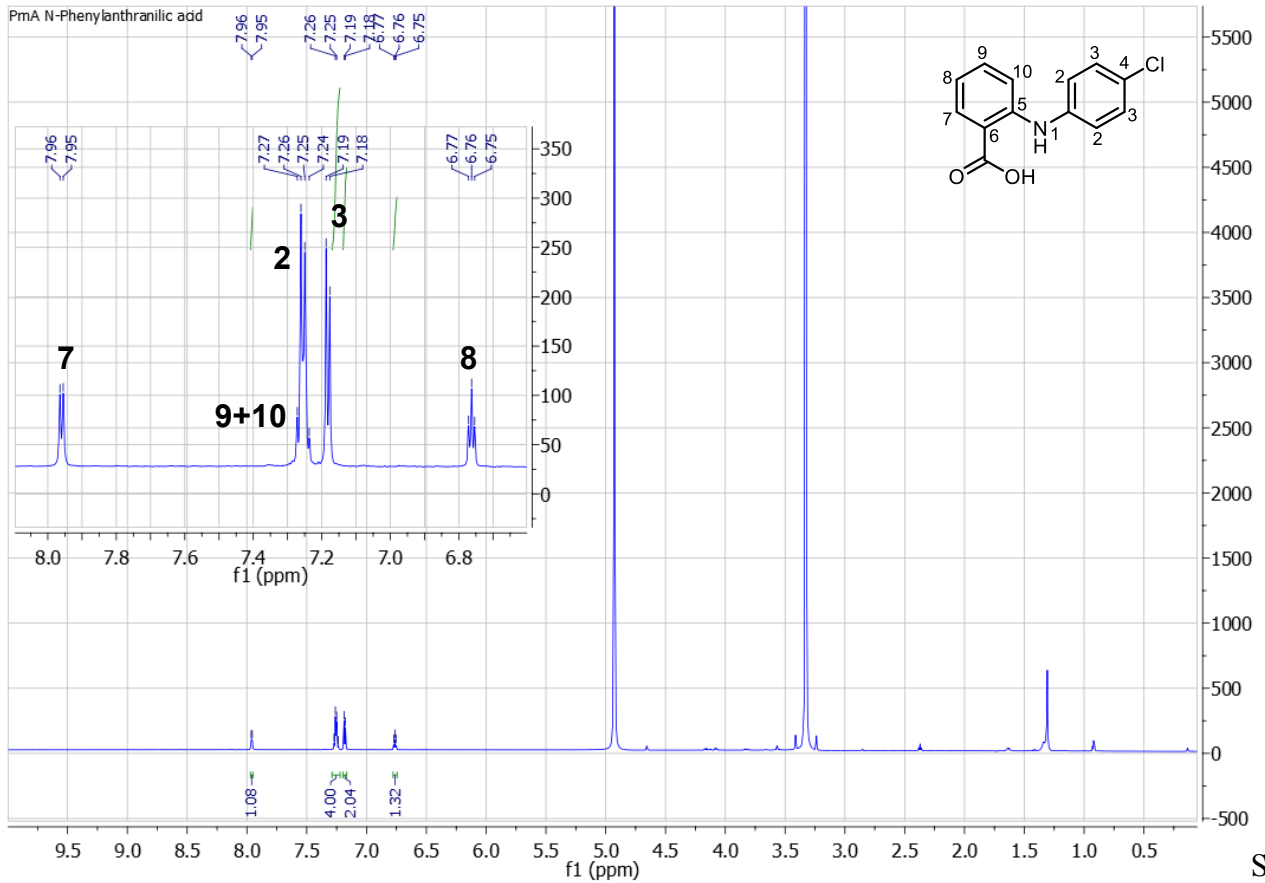

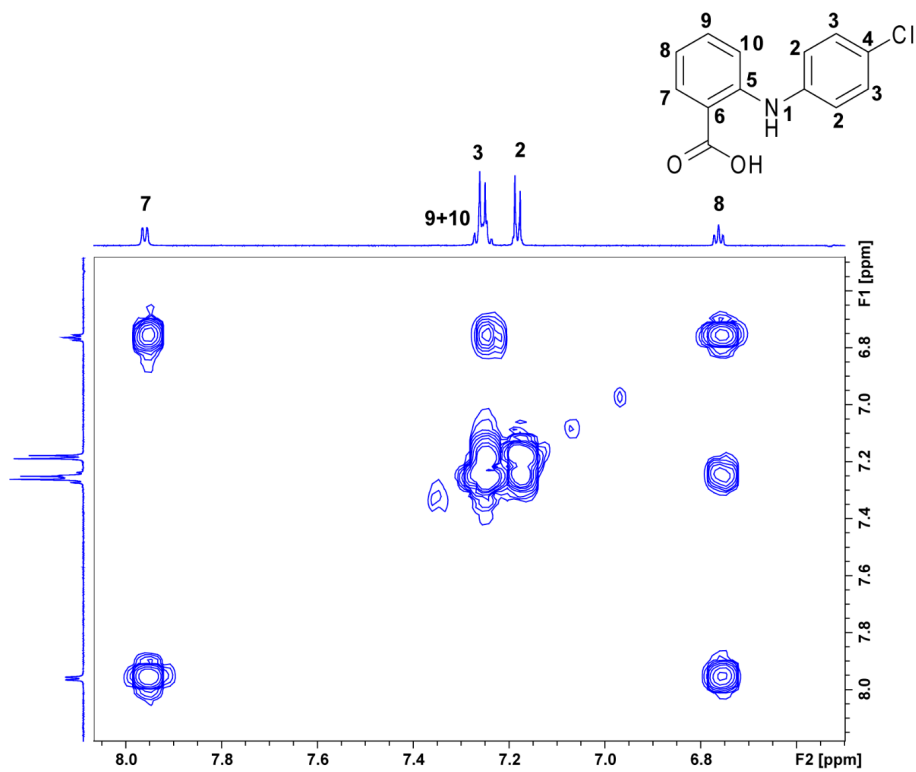

COSY of *N*-(4-chlorophenyl)anthranilic acid

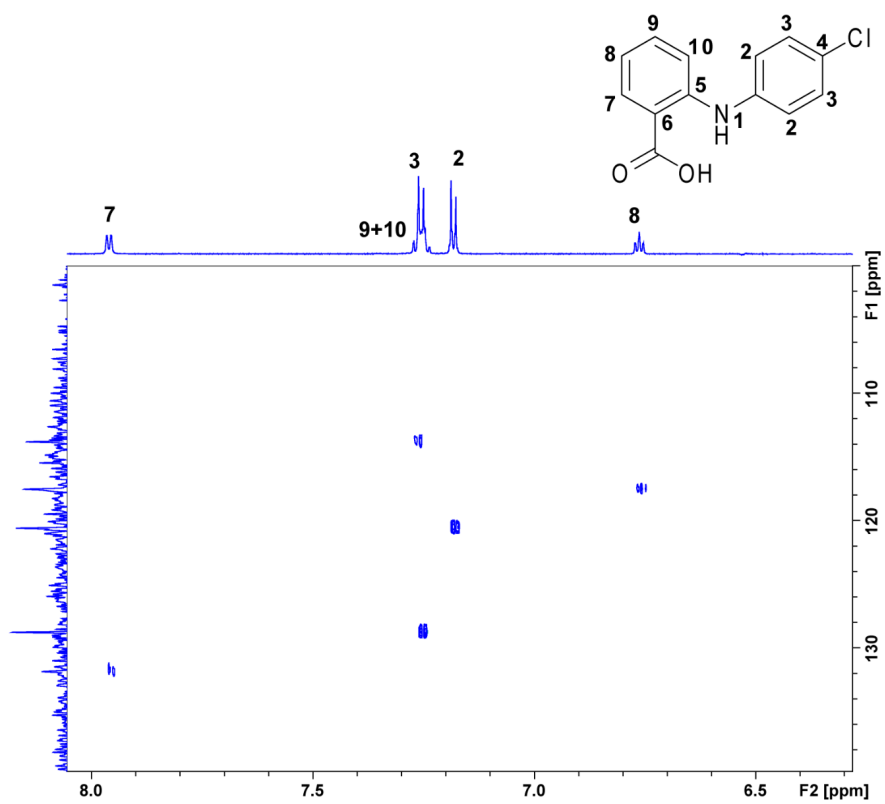

HSQC of *N*-(4-chlorophenyl)anthranilic acid

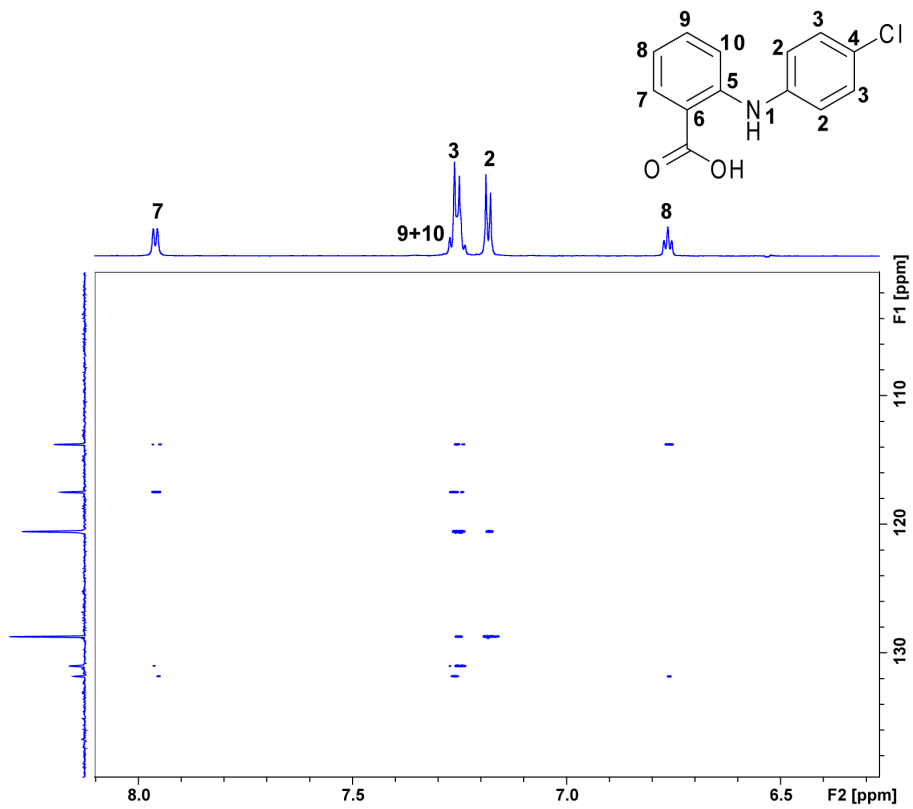

HSQC TOCSY of N-(4-chlorophenyl)anthranilic acid
